# Supplementary material for: Designing stuffed hetero-fullerene nano-clusters: C26B46N12and C14B58N12Li12
Source: Royal Society of Chemistry journal article supplement (doi:10.1039/c4ra03646h), 2014-01-01
Supplement: c4ra03646h1.pdf [file c4ra03646h1.pdf]

## Designing boron based stuffed fullerene clusters

E. D. Jemmis, K. Vidya

School of Chemistry, Indian Institute of Science Education and Research-Thiruvananthapuram,  
CET Campus, Thiruvananthapuram, 695 016, India.

E-mail [jemmis@iisertvm.ac.in](mailto:jemmis@iisertvm.ac.in)

### Supplementary material

**S.1:** Energies (with ZPE correction) and relative energies of CBN clusters formed from each of the eight pentagonal pyramid isomers calculated at B3LYP/6-31G\* level. From isomer I five B<sub>84</sub> based clusters are generated 1a-1e, out of these four are having closed B<sub>84</sub> based structure, the remaining one is an open structure where bonds are broken. Similarly from II-2a-2f (6 closed B<sub>84</sub> based structure), from III-3a-3e (0 closed B<sub>84</sub> based structure), from IV-4a-4g (6 closed B<sub>84</sub> based structure), from V-5a-5e (0 closed B<sub>84</sub> based structure), from VI-6a-6c (3 closed B<sub>84</sub> based structure), from VI-7a-7d (0 closed B<sub>84</sub> based structure), from VII-8a-8c (0 closed B<sub>84</sub> based structure). Only clusters which maintained a closed B<sub>84</sub> based structure are taken for discussion even though they are higher in relative energies. A closed B<sub>84</sub> based structure will have a B<sub>12</sub>@B<sub>12</sub>@B<sub>60</sub> structure without any bonds broken. (See Fig.1,c and Fig.2,a in text)

| S.No |    | Energy in a.u<br>(E+ZPE) | Relative energy in<br>kcal/mol |
|------|----|--------------------------|--------------------------------|
| 1    | 1a | -2789.413491             | 0.0                            |
| 2    | 1b | -2788.964934             | 281.5 (4 closed str)           |
| 3    | 1c | -2789.040433             | 234.1                          |
| 4    | 1d | -2789.100198             | 196.6                          |
| 5    | 1e | -2788.124916             | 808.6                          |
| 6    | 2a | -2789.158767             | 171.5                          |
| 7    | 2b | -2789.404572             | 17.3                           |
| 8    | 2c | -2789.432147             | 0.0 (6 closed str)             |
| 9    | 2d | -2789.321366             | 69.5                           |
| 10   | 2e | -2789.309565             | 76.9                           |
| 11   | 2f | -2789.276547             | 97.6                           |
| 12   | 3a | -2789.690762             | 80.7                           |
| 13   | 3b | -2630.924184             | 99706.7 (0 closed str)         |
| 14   | 3c | -2789.636004             | 115.1                          |
| 15   | 3d | -2789.819461             | 0.0                            |
| 16   | 3e | -2631.278209             | 99283.9                        |
| 17   | 4a | -2789.598049             | 317.8                          |
| 18   | 4b | -2789.927173             | 111.3                          |
| 19   | 4c | -2790.100976             | 2.22 (6 closed str)            |
| 20   | 4d | -2790.096527             | 5.0                            |
| 21   | 4e | -2790.104518             | 0.0                            |
| 22   | 4f | -2789.960456             | 90.4                           |
| 23   | 4g | -2790.029952             | 46.8                           |
| 24   | 5a | -2790.459241             | 0.0                            |
| 25   | 5b | -2789.937607             | 327.3                          |

|    |    |                |                      |
|----|----|----------------|----------------------|
| 26 | 5c | -2789.738183   | 452.5 (0 closed str) |
| 27 | 5d | -2789.972996   | 305.1                |
| 28 | 5e | -2789.514819   | 592.6                |
| 29 | 6a | -2789.802587   | 165.7                |
| 30 | 6b | -2790.066636   | 0.00 (3 closed str)  |
| 31 | 6c | -2790.065525   | 0.7                  |
| 32 | 7a | -2,790.336525/ | 0.0                  |
| 33 | 7b | -2789.882063   | 285.2 (0 closed str) |
| 34 | 7c | -2789.617106   | 451.4                |
| 35 | 7d | -2790.190224   | 91.8                 |
| 36 | 8a | -2790.851737   | 0.00                 |
| 37 | 8b | -2790.036969   | 511.3 (0 closed str) |
| 38 | 8c | -2790.734577   | 73.5                 |

**S.2:** Cartesian coordinates of standard geometries of  $C_2B_3NH_6$  pentagonal pyramid isomers done at B3LYP/6-31G\* level.

I)

| Atomic<br>Number | Coordinates (Angstroms) |   |   |
|------------------|-------------------------|---|---|
|                  | X                       | Y | Z |

-----

|   |           |           |           |
|---|-----------|-----------|-----------|
| 6 | -0.783565 | -0.071005 | 0.792142  |
| 6 | -0.496691 | 1.012598  | -0.230509 |
| 5 | 1.027566  | 1.099278  | 0.071078  |
| 1 | -1.788955 | -0.577798 | -1.009976 |
| 1 | 1.395038  | 2.048084  | 0.705339  |
| 1 | -1.256125 | 1.771880  | -0.395632 |
| 1 | -1.708233 | -0.078052 | 1.359605  |
| 1 | -0.163373 | -2.376424 | 0.388887  |
| 1 | 2.746578  | -0.842908 | -0.460494 |
| 5 | 1.660352  | -0.456283 | -0.146100 |
| 5 | 0.200138  | -1.247064 | 0.224793  |
| 7 | -0.854811 | -0.367714 | -0.672340 |

II)

| Atomic<br>Number | Coordinates (Angstroms) |           |           |
|------------------|-------------------------|-----------|-----------|
|                  | X                       | Y         | Z         |
| 6                | 0.349546                | -1.177713 | -0.200162 |
| 6                | 0.407438                | 1.159689  | -0.209306 |
| 5                | -1.182111               | -0.809108 | -0.340859 |
| 1                | 0.251632                | 0.001366  | 1.806869  |
| 1                | -2.014580               | -1.573164 | 0.051711  |
| 1                | -1.933000               | 1.660839  | 0.066302  |
| 1                | 0.756080                | 2.073978  | 0.275743  |
| 1                | 2.546253                | -0.062162 | -0.223700 |
| 1                | 0.654716                | -2.104801 | 0.290042  |
| 7                | -0.007511               | 0.003752  | 0.821859  |
| 5                | 1.371935                | -0.034133 | -0.437118 |
| 5                | -1.139910               | 0.860406  | -0.334657 |

III)

| Atomic<br>Number | Coordinates (Angstroms) |           |           |
|------------------|-------------------------|-----------|-----------|
|                  | X                       | Y         | Z         |
| 6                | 0.606698                | -1.038918 | -0.218986 |
| 5                | 0.230895                | 1.435590  | -0.160137 |
| 1                | -0.146168               | -0.311155 | 1.851685  |
| 1                | 0.390609                | 2.519398  | 0.318415  |
| 1                | 2.552350                | 0.218188  | -0.030184 |
| 1                | 0.853764                | -2.054373 | 0.075629  |
| 1                | -1.436680               | -1.515976 | 0.093014  |
| 1                | -2.364446               | 0.865787  | -0.037267 |
| 7                | -0.829144               | -0.776717 | -0.261519 |
| 5                | -1.216386               | 0.689541  | -0.311864 |
| 5                | 1.400539                | 0.263699  | -0.346469 |
| 6                | 0.039858                | 0.000751  | 0.827601  |

IV)

| Atomic<br>Number | Coordinates (Angstroms) |           |           |
|------------------|-------------------------|-----------|-----------|
|                  | X                       | Y         | Z         |
| 6                | 0.087559                | -1.264820 | -0.197995 |
| 5                | 0.770502                | 1.152732  | -0.279475 |
| 1                | -0.187409               | 0.053196  | 1.860397  |
| 1                | 1.105077                | 2.245009  | 0.057706  |
| 1                | 2.433712                | -0.750834 | 0.073178  |
| 1                | 0.117865                | -2.269628 | 0.219724  |
| 1                | -2.359378               | -0.807927 | -0.079746 |
| 1                | -1.366246               | 1.594155  | 0.185080  |
| 5                | 1.369721                | -0.361517 | -0.303020 |
| 5                | -1.229057               | -0.527968 | -0.317730 |
| 7                | -0.749088               | 0.886698  | -0.211716 |
| 6                | 0.069802                | 0.000305  | 0.809129  |

V)

| Atomic<br>Number | Coordinates (Angstroms) |           |           |
|------------------|-------------------------|-----------|-----------|
|                  | X                       | Y         | Z         |
| 5                | -0.032181               | 0.002848  | 0.976120  |
| 6                | -1.198132               | -0.337595 | -0.251259 |
| 6                | -0.046601               | -1.166599 | -0.248319 |
| 5                | -0.836485               | 1.162441  | -0.192667 |
| 1                | 0.149788                | -0.304632 | 2.102467  |
| 1                | -1.639215               | 2.006398  | 0.060763  |
| 1                | 1.735212                | 1.856728  | -0.037588 |
| 1                | 1.986772                | -0.758701 | -0.006063 |
| 1                | 0.057472                | -2.233901 | -0.110929 |
| 1                | -2.153539               | -0.819838 | -0.059905 |
| 5                | 0.800975                | 1.147380  | -0.242978 |
| 7                | 1.095766                | -0.326320 | -0.236237 |

VI)

| Atomic<br>Number | Coordinates (Angstroms) |           |           |
|------------------|-------------------------|-----------|-----------|
|                  | X                       | Y         | Z         |
| 5                | -0.064680               | -0.000717 | 0.955996  |
| 6                | -0.983912               | -0.769226 | -0.225600 |
| 1                | 0.031407                | -0.010382 | 2.132648  |
| 1                | -1.949629               | 1.236712  | -0.002785 |
| 1                | 0.805913                | 2.370651  | -0.145477 |
| 1                | 2.159683                | 0.068257  | 0.120488  |
| 1                | 0.950922                | -2.315666 | -0.144136 |
| 1                | -1.870473               | -1.352628 | -0.002777 |
| 6                | -1.029918               | 0.706881  | -0.224572 |
| 5                | 0.358742                | 1.280360  | -0.289796 |
| 7                | 1.185205                | 0.036510  | -0.160800 |
| 5                | 0.437684                | -1.255331 | -0.292464 |

VII)

| Atomic<br>Number | Coordinates (Angstroms) |           |           |
|------------------|-------------------------|-----------|-----------|
|                  | X                       | Y         | Z         |
| 5                | 0.000027                | -0.030143 | 0.970870  |
| 1                | 0.000252                | -0.445927 | 2.078623  |
| 1                | -2.090366               | -0.875735 | -0.066272 |
| 1                | -1.661402               | 1.993870  | 0.045709  |
| 1                | 1.659033                | 1.995903  | 0.045579  |
| 1                | 2.091471                | -0.873263 | -0.066392 |
| 1                | 0.001271                | -2.089522 | -0.050545 |
| 6                | -1.188394               | -0.295250 | -0.232913 |
| 5                | -0.837640               | 1.168462  | -0.203152 |
| 5                | 0.835981                | 1.169692  | -0.202947 |
| 6                | 1.188864                | -0.293722 | -0.232964 |
| 7                | 0.000725                | -1.101649 | -0.287898 |

VIII)

| Atomic<br>Number | Coordinates (Angstroms) |           |           |
|------------------|-------------------------|-----------|-----------|
|                  | X                       | Y         | Z         |
| 5                | -0.040159               | -0.034247 | 0.961478  |
| 1                | 0.174373                | -0.183029 | 2.114622  |
| 1                | -0.527843               | -2.211903 | -0.035727 |
| 1                | -2.544173               | -0.029366 | -0.166658 |
| 1                | -0.731505               | 2.227371  | 0.167798  |
| 1                | 2.088119                | 1.377418  | -0.191075 |
| 1                | 1.708762                | -1.272847 | 0.011761  |
| 6                | -0.418970               | -1.150184 | -0.215715 |
| 5                | -1.363914               | 0.026266  | -0.314711 |
| 7                | 0.949029                | -0.645986 | -0.232684 |
| 6                | -0.410327               | 1.231338  | -0.119043 |
| 5                | 1.037042                | 0.833447  | -0.299444 |

**S.3:** Cartesian coordinates of optimized structures of B<sub>84</sub> based CBN clusters with closed and lower energy structures taken from the 38 clusters made from each of the eight pentagonal pyramid isomers computed at B3LYP/6-31G\* level.

1)

| Atomic<br>Number | Coordinates (Angstroms) |           |           |
|------------------|-------------------------|-----------|-----------|
|                  | X                       | Y         | Z         |
| 5                | -0.104406               | 1.357747  | 0.828121  |
| 5                | 1.328831                | 0.811045  | 0.192373  |
| 5                | 0.104406                | -1.357747 | -0.828121 |
| 5                | -1.328831               | -0.811045 | -0.192373 |
| 5                | 1.305591                | -0.844940 | 0.196421  |
| 5                | -1.305591               | 0.844940  | -0.196421 |

|   |           |           |           |
|---|-----------|-----------|-----------|
| 5 | -0.143099 | -1.349746 | 0.834109  |
| 5 | 1.025370  | -0.017666 | -1.222444 |
| 5 | -1.025370 | 0.017666  | 1.222444  |
| 5 | 0.143099  | 1.349746  | -0.834109 |
| 5 | 3.399756  | -1.043424 | -2.089656 |
| 5 | -3.133828 | 1.800097  | -1.978405 |
| 5 | 0.042875  | 4.071162  | 0.711374  |
| 5 | -2.318343 | 3.199617  | -1.387252 |
| 5 | -2.629976 | 3.151667  | 0.302049  |
| 5 | 0.149744  | -2.768240 | 3.254125  |
| 5 | -2.210603 | 1.588640  | 3.186769  |
| 5 | 2.318343  | -3.199617 | 1.387252  |
| 5 | 3.133828  | -1.800097 | 1.978405  |
| 5 | 0.468549  | 2.860566  | 3.128063  |
| 5 | -1.257184 | -3.577049 | -1.790750 |
| 5 | 2.629976  | -3.151667 | -0.302049 |
| 5 | -3.399756 | 1.043424  | 2.089656  |
| 5 | -0.149744 | 2.768240  | -3.254125 |
| 5 | -1.594816 | 0.175511  | 3.973551  |
| 5 | -3.327213 | -1.502028 | -1.903795 |
| 5 | -1.798642 | -3.416471 | 1.441471  |
| 5 | -4.079595 | -0.588863 | -0.669573 |
| 5 | -0.042875 | -4.071162 | -0.711374 |
| 5 | -3.780278 | -1.461297 | 0.766488  |
| 5 | 1.542704  | 2.583778  | -2.917033 |
| 5 | 3.780278  | 1.461297  | -0.766488 |
| 5 | -0.468549 | -2.860566 | -3.128063 |
| 5 | 4.079595  | 0.588863  | 0.669573  |
| 5 | 3.327213  | 1.502028  | 1.903795  |
| 5 | 1.594816  | -0.175511 | -3.973551 |
| 5 | 1.059029  | -1.367398 | 3.894317  |
| 5 | 2.210603  | -1.588640 | -3.186769 |
| 5 | 0.158034  | 0.031816  | 4.317617  |
| 5 | 1.123976  | 1.375972  | 3.858215  |
| 5 | -1.542704 | -2.583778 | 2.917033  |
| 5 | -1.059029 | 1.367398  | -3.894317 |
| 5 | 1.257184  | 3.577049  | 1.790750  |
| 5 | 1.798642  | 3.416471  | -1.441471 |
| 5 | -1.123976 | -1.375972 | -3.858215 |
| 5 | -0.158034 | -0.031816 | -4.317617 |
| 6 | -0.604920 | 0.004461  | -1.421627 |
| 6 | 0.604920  | -0.004461 | 1.421627  |
| 6 | 2.409889  | -0.819776 | 3.139077  |
| 6 | 2.451770  | 0.743743  | 3.118998  |
| 6 | -2.451770 | -0.743743 | -3.118998 |
| 6 | -2.409889 | 0.819776  | -3.139077 |
| 6 | -2.683654 | -2.836864 | -1.202449 |
| 6 | -2.931392 | -2.798812 | 0.330346  |
| 6 | 2.931392  | 2.798812  | -0.330346 |
| 6 | 2.683654  | 2.836864  | 1.202449  |
| 6 | -3.877682 | 1.087983  | -0.707360 |
| 6 | -3.582005 | 1.851352  | 0.608810  |

|   |           |           |           |
|---|-----------|-----------|-----------|
| 6 | 3.877682  | -1.087983 | 0.707360  |
| 6 | 3.582005  | -1.851352 | -0.608810 |
| 6 | 0.758396  | -3.561080 | 1.950858  |
| 6 | -0.342921 | -3.958066 | 0.935502  |
| 6 | 0.342921  | 3.958066  | -0.935502 |
| 6 | -0.758396 | 3.561080  | -1.950858 |
| 6 | 1.135691  | -2.861051 | -2.724888 |
| 6 | 1.372165  | -3.575330 | -1.361483 |
| 6 | -1.372165 | 3.575330  | 1.361483  |
| 6 | -1.135691 | 2.861051  | 2.724888  |
| 6 | -3.393525 | -0.590801 | 2.165100  |
| 6 | -2.347126 | -1.086378 | 3.205804  |
| 6 | 2.347126  | 1.086378  | -3.205804 |
| 6 | 3.393525  | 0.590801  | -2.165100 |
| 7 | 1.935540  | -0.112597 | -2.263361 |
| 7 | 0.124232  | -2.556317 | -1.525703 |
| 7 | -2.543259 | -1.438203 | -0.398642 |
| 7 | -2.415366 | 1.631228  | -0.441190 |
| 7 | 0.332964  | 2.490222  | -1.600040 |
| 7 | -0.124232 | 2.556317  | 1.525703  |
| 7 | 2.543259  | 1.438203  | 0.398642  |
| 7 | 2.415366  | -1.631228 | 0.441190  |
| 7 | -0.332964 | -2.490222 | 1.600040  |
| 7 | -1.935540 | 0.112597  | 2.263361  |
| 7 | 1.112455  | -0.006167 | 2.693312  |
| 7 | -1.112455 | 0.006167  | -2.693312 |

2)

| Atomic<br>Number | Coordinates (Angstroms) |           |           |
|------------------|-------------------------|-----------|-----------|
|                  | X                       | Y         | Z         |
| 5                | -1.066014               | -0.833133 | -0.835918 |
| 5                | -0.514399               | 0.645432  | -1.361295 |
| 5                | 1.066014                | 0.833133  | 0.835918  |
| 5                | 0.514399                | -0.645432 | 1.361295  |
| 6                | -0.172932               | 1.502791  | -0.002916 |
| 5                | -1.496892               | 0.545695  | -0.004464 |
| 6                | 0.172932                | -1.502791 | 0.002916  |
| 5                | 1.496892                | -0.545695 | 0.004464  |
| 5                | -0.519298               | 0.646649  | 1.358856  |
| 5                | 1.071352                | 0.832038  | -0.833390 |
| 5                | -1.071352               | -0.832038 | 0.833390  |
| 5                | 0.519298                | -0.646649 | -1.358856 |
| 6                | 1.968118                | 3.175544  | -1.729325 |
| 6                | 0.791427                | -3.761939 | 1.297579  |
| 5                | 1.815354                | -3.733845 | 0.034394  |
| 6                | -2.610131               | -1.004492 | 3.003661  |
| 5                | -1.565109               | -2.327933 | -3.066596 |
| 6                | 0.826355                | -3.742181 | -1.272637 |
| 6                | 1.947074                | 3.180237  | 1.744064  |
| 6                | -2.517098               | 1.845178  | 2.683234  |

|   |           |           |           |
|---|-----------|-----------|-----------|
| 6 | -0.826355 | 3.742181  | 1.272637  |
| 5 | -1.815354 | 3.733845  | -0.034394 |
| 6 | -3.540744 | -1.164719 | -1.694725 |
| 5 | -1.577305 | -2.251976 | 3.022425  |
| 6 | -0.791427 | 3.761939  | -1.297579 |
| 6 | -1.968118 | -3.175544 | 1.729325  |
| 6 | 2.517098  | -1.845178 | -2.683234 |
| 5 | 1.565109  | 2.327933  | 3.066596  |
| 6 | 3.540744  | 1.164719  | 1.694725  |
| 6 | -1.947074 | -3.180237 | -1.744064 |
| 6 | -2.098959 | 0.559462  | -3.495101 |
| 5 | -3.277480 | 2.703608  | -0.040888 |
| 6 | -4.008069 | 0.244381  | 0.828816  |
| 5 | 1.577305  | 2.251976  | -3.022425 |
| 6 | -3.535650 | 1.691491  | -1.291892 |
| 5 | 3.277480  | -2.703608 | 0.040888  |
| 6 | 3.535650  | -1.691491 | 1.291892  |
| 6 | 2.610131  | 1.004492  | -3.003661 |
| 7 | -0.300175 | 2.856768  | -0.006910 |
| 7 | 0.300175  | -2.856768 | 0.006910  |
| 7 | -1.963565 | -1.580940 | -1.583794 |
| 7 | 0.961659  | -1.220811 | -2.539119 |
| 7 | 2.777178  | -1.078114 | -0.008459 |
| 7 | 0.985649  | -1.256235 | 2.512269  |
| 7 | -2.004715 | -1.582976 | 1.533756  |
| 7 | 1.963565  | 1.580940  | 1.583794  |
| 7 | 2.004715  | 1.582976  | -1.533756 |
| 7 | -0.985649 | 1.256235  | -2.512269 |
| 7 | -2.777178 | 1.078114  | 0.008459  |
| 7 | -0.961659 | 1.220811  | 2.539119  |
| 5 | 2.577412  | -1.863811 | 2.674652  |
| 5 | 3.990604  | -0.205443 | 0.793702  |
| 5 | -0.743454 | -3.934535 | -0.859113 |
| 5 | -0.756297 | -3.940297 | 0.860981  |
| 5 | 1.204790  | -2.902636 | 2.676148  |
| 5 | 0.590308  | -0.690908 | 4.101558  |
| 6 | 2.098959  | -0.559462 | 3.495101  |
| 6 | 0.042910  | -2.119316 | 3.515588  |
| 5 | -3.597852 | -1.134565 | 1.713862  |
| 5 | -3.247488 | -2.603901 | 0.894428  |
| 5 | -2.629925 | -0.976535 | -3.038443 |
| 5 | -3.206278 | -2.564614 | -0.909803 |
| 5 | 1.238262  | -2.844160 | -2.639980 |
| 5 | 0.517651  | -0.728141 | -4.157576 |
| 5 | 2.107318  | -0.519886 | -3.530569 |
| 6 | 0.051480  | -2.150038 | -3.525797 |
| 6 | 4.008069  | -0.244381 | -0.828816 |
| 5 | 3.538272  | -1.714625 | -1.341544 |
| 5 | 0.756297  | 3.940297  | -0.860981 |
| 5 | 0.743454  | 3.934535  | 0.859113  |
| 5 | -3.990604 | 0.205443  | -0.793702 |
| 5 | -3.538272 | 1.714625  | 1.341544  |



|   |           |          |           |
|---|-----------|----------|-----------|
| 5 | -0.590308 | 0.690908 | -4.101558 |
| 5 | -1.204790 | 2.902636 | -2.676148 |
| 5 | -2.577412 | 1.863811 | -2.674652 |
| 6 | -0.042910 | 2.119316 | -3.515588 |
| 5 | 3.597852  | 1.134565 | -1.713862 |
| 5 | 3.247488  | 2.603901 | -0.894428 |
| 5 | 2.629925  | 0.976535 | 3.038443  |
| 5 | 3.206278  | 2.564614 | 0.909803  |
| 5 | -2.107318 | 0.519886 | 3.530569  |
| 5 | -0.517651 | 0.728141 | 4.157576  |
| 5 | -1.238262 | 2.844160 | 2.639980  |
| 6 | -0.051480 | 2.150038 | 3.525797  |

3)

| Atomic<br>Number | Coordinates (Angstroms) |           |           |
|------------------|-------------------------|-----------|-----------|
|                  | X                       | Y         | Z         |
| 5                | -0.253729               | 1.379271  | 0.838462  |
| 5                | 1.281484                | 0.986639  | 0.173575  |
| 5                | 0.253729                | -1.379271 | -0.838462 |
| 5                | -1.281484               | -0.986639 | -0.173575 |
| 5                | 1.456365                | -0.736832 | 0.188434  |
| 5                | -1.456365               | 0.736832  | -0.188434 |
| 5                | -0.013118               | -1.418887 | 0.869547  |
| 5                | 1.064322                | 0.075724  | -1.262790 |
| 5                | -1.064322               | -0.075724 | 1.262790  |
| 5                | 0.013118                | 1.418887  | -0.869547 |
| 5                | 3.304742                | -1.377167 | -1.912735 |
| 5                | -3.482271               | 1.735566  | -2.041706 |
| 5                | 0.281673                | 3.980879  | 0.440883  |
| 5                | -2.543252               | 3.055678  | -1.557029 |
| 5                | -2.350538               | 3.315071  | 0.162988  |
| 5                | 0.123485                | -3.203355 | 3.342506  |
| 5                | -2.254004               | 1.519774  | 3.272189  |
| 5                | 2.543252                | -3.055678 | 1.557029  |
| 5                | 3.482271                | -1.735566 | 2.041706  |
| 5                | 0.377402                | 2.796732  | 3.392789  |
| 5                | -1.140272               | -3.454691 | -2.009051 |
| 5                | 2.350538                | -3.315071 | -0.162988 |
| 5                | -3.304742               | 1.377167  | 1.912735  |
| 5                | -0.123485               | 3.203355  | -3.342506 |
| 5                | -1.997306               | 0.145547  | 4.141338  |
| 5                | -3.301258               | -1.560522 | -2.129677 |
| 5                | -2.055103               | -3.129821 | 1.577044  |
| 5                | -4.111976               | -0.795542 | -0.845623 |
| 5                | -0.281673               | -3.980879 | -0.440883 |
| 5                | -3.800123               | -1.155867 | 0.883715  |
| 5                | 1.378078                | 2.599316  | -3.068079 |
| 5                | 3.800123                | 1.155867  | -0.883715 |
| 5                | -0.377402               | -2.796732 | -3.392789 |
| 5                | 4.111976                | 0.795542  | 0.845623  |
| 5                | 3.301258                | 1.560522  | 2.129677  |

|   |           |           |           |
|---|-----------|-----------|-----------|
| 5 | 1.997306  | -0.145547 | -4.141338 |
| 5 | 1.301799  | -1.583505 | 3.587997  |
| 5 | 2.254004  | -1.519774 | -3.272189 |
| 5 | 0.166575  | -0.414960 | 4.035601  |
| 5 | 0.965472  | 1.078638  | 3.892343  |
| 5 | -1.378078 | -2.599316 | 3.068079  |
| 5 | -1.301799 | 1.583505  | -3.587997 |
| 5 | 1.140272  | 3.454691  | 2.009051  |
| 5 | 2.055103  | 3.129821  | -1.577044 |
| 5 | -0.965472 | -1.078638 | -3.892343 |
| 5 | -0.166575 | 0.414960  | -4.035601 |
| 6 | -0.610315 | -0.032985 | -1.359712 |
| 6 | 0.610315  | 0.032985  | 1.359712  |
| 6 | 2.570839  | -0.862879 | 3.140178  |
| 6 | -2.570839 | 0.862879  | -3.140178 |
| 6 | -2.385922 | -2.672701 | -1.700097 |
| 6 | 2.385922  | 2.672701  | 1.700097  |
| 6 | -3.934843 | 0.662373  | -1.129963 |
| 6 | 3.934843  | -0.662373 | 1.129963  |
| 6 | 1.284562  | -3.035578 | 2.517065  |
| 6 | -1.284562 | 3.035578  | -2.517065 |
| 6 | 0.997772  | -2.405229 | -3.137299 |
| 6 | -0.997772 | 2.405229  | 3.137299  |
| 6 | -1.484027 | -1.093084 | 3.622272  |
| 6 | 1.484027  | 1.093084  | -3.622272 |
| 6 | -1.144168 | 0.078500  | -2.691918 |
| 6 | 0.407600  | -2.634001 | -1.699163 |
| 6 | -2.487179 | -1.870712 | -0.476158 |
| 6 | -2.806647 | 1.391974  | -0.470292 |
| 6 | 0.080779  | 2.707453  | -1.711883 |
| 6 | 2.063630  | 0.053818  | -2.426052 |
| 6 | -0.407600 | 2.634001  | 1.699163  |
| 6 | -2.063630 | -0.053818 | 2.426052  |
| 6 | -0.080779 | -2.707453 | 1.711883  |
| 6 | 2.806647  | -1.391974 | 0.470292  |
| 6 | 2.487179  | 1.870712  | 0.476158  |
| 6 | 1.144168  | -0.078500 | 2.691918  |
| 7 | -2.411604 | -0.613505 | -3.203092 |
| 7 | 2.411604  | 0.613505  | 3.203092  |
| 7 | 0.822112  | 3.707203  | -0.880313 |
| 7 | -0.822112 | -3.707203 | 0.880313  |
| 7 | 3.451820  | 0.118107  | -1.843545 |
| 7 | -3.451820 | -0.118107 | 1.843545  |
| 7 | 1.094485  | -3.692449 | -0.840026 |
| 7 | -1.094485 | 3.692449  | 0.840026  |
| 7 | -3.058486 | -2.417921 | 0.802302  |
| 7 | 3.058486  | 2.417921  | -0.802302 |
| 7 | -3.187897 | 2.207409  | 0.720698  |
| 7 | 3.187897  | -2.207409 | -0.720698 |

4)

| Atomic<br>Number | Coordinates (Angstroms) |           |           |
|------------------|-------------------------|-----------|-----------|
|                  | X                       | Y         | Z         |
| 5                | -0.188154               | 1.537508  | -0.173271 |
| 5                | 1.136730                | 0.738776  | -0.738606 |
| 5                | 0.188154                | -1.537508 | 0.173271  |
| 5                | -1.136730               | -0.738776 | 0.738606  |
| 5                | 1.460726                | -0.520819 | 0.260765  |
| 5                | -1.460726               | 0.520819  | -0.260765 |
| 5                | 0.309515                | -0.502591 | 1.440562  |
| 5                | 0.700992                | -0.771947 | -1.178429 |
| 5                | -0.700992               | 0.771947  | 1.178429  |
| 5                | -0.309515               | 0.502591  | -1.440562 |
| 5                | -3.965132               | 0.091668  | -1.406000 |
| 5                | -3.263370               | 1.515936  | -2.006420 |
| 5                | 1.591343                | -0.074045 | 3.775155  |
| 5                | 3.263370                | -1.515936 | 2.006420  |
| 5                | 3.965132                | -0.091668 | 1.406000  |
| 5                | -1.591343               | 0.074045  | -3.775155 |
| 5                | -3.208146               | -2.500373 | 0.629813  |
| 5                | -3.785491               | -0.999127 | 1.197042  |
| 5                | 0.028196                | 0.227410  | -4.176830 |
| 5                | 3.785491                | 0.999127  | -1.197042 |
| 5                | 3.208146                | 2.500373  | -0.629813 |
| 5                | 0.943815                | 2.606489  | 2.879593  |
| 5                | 1.498512                | 3.421871  | 1.499414  |
| 5                | -0.028196               | -0.227410 | 4.176830  |
| 5                | 0.738734                | 3.799108  | -1.207163 |
| 5                | -1.498512               | -3.421871 | -1.499414 |
| 6                | -0.864873               | -0.868397 | -0.841662 |
| 6                | 0.864873                | 0.868397  | 0.841662  |
| 6                | 2.832542                | 2.668060  | 1.022496  |
| 6                | -2.832542               | -2.668060 | -1.022496 |
| 6                | -2.100146               | -3.014787 | 1.733711  |
| 6                | 2.100146                | 3.014787  | -1.733711 |
| 6                | -4.084823               | 0.334821  | 0.215340  |
| 6                | 4.084823                | -0.334821 | -0.215340 |
| 6                | 2.074326                | -1.497122 | 3.177990  |
| 6                | -2.074326               | 1.497122  | -3.177990 |
| 6                | 1.366625                | -1.437827 | -2.278622 |
| 6                | 0.403637                | -2.952176 | 0.354510  |
| 6                | -2.198516               | -1.459238 | 1.378862  |
| 6                | -2.818156               | 0.916800  | -0.543602 |
| 6                | -0.625977               | 0.912599  | -2.783705 |
| 6                | -0.403637               | 2.952176  | -0.354510 |
| 6                | 2.198516                | 1.459238  | -1.378862 |
| 6                | 2.818156                | -0.916800 | 0.543602  |
| 6                | 0.625977                | -0.912599 | 2.783705  |
| 6                | -1.366625               | 1.437827  | 2.278622  |
| 6                | 1.651121                | 1.749745  | 1.600313  |
| 6                | -1.651121               | -1.749745 | -1.600313 |
| 5                | -3.271087               | -1.465684 | -1.968576 |

|   |           |           |           |
|---|-----------|-----------|-----------|
| 5 | -0.943815 | -2.606489 | -2.879593 |
| 7 | -2.016948 | -1.423035 | -3.062277 |
| 7 | 2.016948  | 1.423035  | 3.062277  |
| 5 | 3.271087  | 1.465684  | 1.968576  |
| 5 | 2.611637  | -0.761070 | -3.088105 |
| 5 | 1.877690  | -3.591034 | 0.677895  |
| 5 | -1.877690 | 3.591034  | -0.677895 |
| 5 | -1.881268 | -1.975640 | 2.917429  |
| 7 | -2.920535 | -0.801813 | 2.600140  |
| 7 | 2.920535  | 0.801813  | -2.600140 |
| 5 | 1.881268  | 1.975640  | -2.917429 |
| 5 | -3.584740 | 1.778960  | 0.661944  |
| 7 | -3.094516 | 2.467072  | -0.708199 |
| 7 | 3.094516  | -2.467072 | 0.708199  |
| 5 | 3.584740  | -1.778960 | -0.661944 |
| 5 | -0.870125 | 2.523077  | -3.048806 |
| 7 | 0.422383  | 1.702249  | -3.617248 |
| 7 | -0.422383 | -1.702249 | 3.617248  |
| 5 | 0.870125  | -2.523077 | 3.048806  |
| 7 | 0.443624  | 3.994875  | 0.373010  |
| 6 | -0.714015 | 3.577526  | -1.805822 |
| 5 | -1.125995 | 3.954677  | 0.784545  |
| 5 | -2.611637 | 0.761070  | 3.088105  |
| 7 | -0.443624 | -3.994875 | -0.373010 |
| 6 | 0.714015  | -3.577526 | 1.805822  |
| 5 | 1.125995  | -3.954677 | -0.784545 |
| 5 | -0.738734 | -3.799108 | 1.207163  |
| 7 | -0.621557 | 2.375717  | 3.228873  |
| 5 | -1.658657 | 3.099317  | 2.227250  |
| 6 | -2.844824 | 2.036445  | 2.117977  |
| 5 | -1.182068 | 1.013682  | 3.900430  |
| 5 | 1.182068  | -1.013682 | -3.900430 |
| 5 | 1.658657  | -3.099317 | -2.227250 |
| 7 | 0.621557  | -2.375717 | -3.228873 |
| 6 | 2.844824  | -2.036445 | -2.117977 |

5)

| Atomic<br>Number | Coordinates (Angstroms) |           |           |
|------------------|-------------------------|-----------|-----------|
|                  | X                       | Y         | Z         |
| 5                | -0.141612               | 1.241528  | 0.871599  |
| 5                | 1.241580                | 0.772512  | 0.178493  |
| 5                | 0.141612                | -1.241528 | -0.871599 |
| 5                | -1.241580               | -0.772512 | -0.178493 |
| 5                | 1.287179                | -0.807335 | 0.140009  |
| 5                | -1.287179               | 0.807335  | -0.140009 |
| 5                | -0.088405               | -1.318139 | 0.836593  |
| 5                | 1.066611                | 0.073204  | -1.364549 |
| 5                | -1.066611               | -0.073204 | 1.364549  |
| 5                | 0.088405                | 1.318139  | -0.836593 |

|   |           |           |           |
|---|-----------|-----------|-----------|
| 5 | -3.282472 | 1.805230  | -2.021335 |
| 5 | 0.910945  | -2.751693 | 3.219694  |
| 5 | 3.282472  | -1.805230 | 2.021335  |
| 5 | 0.392834  | 2.815363  | 3.068052  |
| 5 | -0.910945 | 2.751693  | -3.219694 |
| 5 | -1.215607 | -0.226750 | 3.934462  |
| 5 | -3.296254 | -1.428186 | -1.987432 |
| 5 | -0.392834 | -2.815363 | -3.068052 |
| 5 | 3.296254  | 1.428186  | 1.987432  |
| 5 | 1.215607  | 0.226750  | -3.934462 |
| 5 | 0.440597  | -0.144969 | 4.284400  |
| 5 | 1.251247  | 1.295036  | 3.830900  |
| 5 | -1.251247 | -1.295036 | -3.830900 |
| 5 | -0.440597 | 0.144969  | -4.284400 |
| 6 | -0.592405 | 0.028612  | -1.394858 |
| 6 | 0.592405  | -0.028612 | 1.394858  |
| 6 | 2.583365  | -0.937398 | 3.166917  |
| 6 | -2.947984 | -2.757477 | 0.257637  |
| 6 | 2.947984  | 2.757477  | -0.257637 |
| 6 | -3.579725 | 1.949066  | 0.533925  |
| 6 | 3.579725  | -1.949066 | -0.533925 |
| 6 | -0.466029 | -3.846766 | 0.851558  |
| 6 | 0.466029  | 3.846766  | -0.851558 |
| 6 | 1.400057  | -3.649596 | -1.142881 |
| 6 | -1.400057 | 3.649596  | 1.142881  |
| 6 | -3.234414 | -0.311535 | 1.745850  |
| 6 | 3.234414  | 0.311535  | -1.745850 |
| 5 | 0.154025  | -2.587642 | -1.497599 |
| 5 | -2.524438 | -1.425019 | -0.499518 |
| 5 | -2.411573 | 1.700961  | -0.564305 |
| 5 | 0.256551  | 2.482984  | -1.842726 |
| 5 | 2.041437  | -1.070777 | -3.707621 |
| 5 | -0.154025 | 2.587642  | 1.497599  |
| 5 | 2.524438  | 1.425019  | 0.499518  |
| 5 | 2.411573  | -1.700961 | 0.564305  |
| 5 | -0.256551 | -2.482984 | 1.842726  |
| 5 | -2.041437 | 1.070777  | 3.707621  |
| 5 | 1.224073  | -0.066393 | 2.748639  |
| 5 | -1.224073 | 0.066393  | -2.748639 |
| 7 | -1.081888 | -3.518785 | -1.752067 |
| 5 | 1.391538  | -3.025466 | -2.573434 |
| 6 | -0.042745 | -3.885388 | -0.611803 |
| 6 | -3.647837 | -1.270880 | 0.583495  |
| 7 | -3.915335 | -0.633375 | -0.745655 |
| 5 | -2.617717 | -2.897248 | -1.293919 |
| 7 | -2.600805 | -0.619707 | -3.126081 |
| 6 | -2.583365 | 0.937398  | -3.166917 |
| 6 | -1.361800 | 1.367085  | -3.823095 |
| 7 | 2.600805  | 0.619707  | 3.126081  |
| 6 | 1.361800  | -1.367085 | 3.823095  |
| 7 | 1.081888  | 3.518785  | 1.752067  |
| 5 | -1.391538 | 3.025466  | 2.573434  |

|   |           |           |           |
|---|-----------|-----------|-----------|
| 6 | 0.042745  | 3.885388  | 0.611803  |
| 7 | 3.915335  | 0.633375  | 0.745655  |
| 5 | 2.617717  | 2.897248  | 1.293919  |
| 6 | 3.647837  | 1.270880  | -0.583495 |
| 7 | -2.395703 | 3.081378  | -1.294805 |
| 5 | -3.980543 | 1.076959  | -0.747316 |
| 6 | -2.590987 | 3.097400  | 0.198968  |
| 6 | 2.590987  | -3.097400 | -0.198968 |
| 5 | 3.980543  | -1.076959 | 0.747316  |
| 7 | 2.395703  | -3.081378 | 1.294805  |
| 7 | 1.684573  | 2.536526  | -2.411603 |
| 5 | -0.918368 | 3.692916  | -1.923049 |
| 6 | 1.827335  | 3.215570  | -1.240198 |
| 6 | -1.827335 | -3.215570 | 1.240198  |
| 5 | 0.918368  | -3.692916 | 1.923049  |
| 7 | -1.684573 | -2.536526 | 2.411603  |
| 7 | 2.565839  | -1.880674 | -2.761087 |
| 5 | 2.114249  | 1.009698  | -2.680148 |
| 6 | 3.313578  | -1.156091 | -1.750959 |
| 6 | -3.313578 | 1.156091  | 1.750959  |
| 5 | -2.114249 | -1.009698 | 2.680148  |
| 7 | -2.565839 | 1.880674  | 2.761087  |

6)

| Atomic<br>Number | Coordinates (Angstroms) |           |           |
|------------------|-------------------------|-----------|-----------|
|                  | X                       | Y         | Z         |
| 5                | -0.274504               | 1.362108  | 0.567006  |
| 5                | 1.185198                | 0.734767  | 0.634414  |
| 5                | 0.274504                | -1.362108 | -0.567006 |
| 5                | -1.185198               | -0.734767 | -0.634414 |
| 5                | 1.000270                | -0.842976 | 0.753070  |
| 5                | -1.000270               | 0.842976  | -0.753070 |
| 5                | -0.553583               | -1.176401 | 0.770519  |
| 5                | 1.338033                | -0.194944 | -0.648119 |
| 5                | -1.338033               | 0.194944  | 0.648119  |
| 5                | 0.553583                | 1.176401  | -0.770519 |
| 5                | 3.813416                | -1.220532 | -0.466208 |
| 5                | -2.353254               | 3.164356  | -1.079012 |
| 5                | -3.813416               | 1.220532  | 0.466208  |
| 5                | -2.405507               | -3.165329 | 0.931215  |
| 5                | -3.847856               | -1.381182 | -0.563225 |
| 5                | 3.847856                | 1.381182  | 0.563225  |
| 5                | -0.574545               | -0.970923 | 3.874395  |
| 5                | -0.297582               | 1.754491  | 3.574288  |
| 5                | 0.574545                | 0.970923  | -3.874395 |
| 5                | 2.405507                | 3.165329  | -0.931215 |
| 5                | 0.297582                | -1.754491 | -3.574288 |
| 6                | 0.004469                | -0.120123 | -1.439712 |

|   |           |           |           |
|---|-----------|-----------|-----------|
| 6 | -0.004469 | 0.120123  | 1.439712  |
| 6 | 0.970633  | -0.548638 | 3.841902  |
| 6 | 1.127514  | 1.048969  | 3.718551  |
| 6 | -1.127514 | -1.048969 | -3.718551 |
| 6 | -0.970633 | 0.548638  | -3.841902 |
| 5 | -1.089349 | -2.301514 | 1.549754  |
| 5 | 1.966925  | -1.622943 | 1.538915  |
| 5 | 2.307540  | 1.508731  | 1.220279  |
| 5 | -2.660902 | 0.344937  | 1.257339  |
| 5 | -0.551178 | 2.712005  | 1.067115  |
| 5 | -1.966925 | 1.622943  | -1.538915 |
| 5 | -2.307540 | -1.508731 | -1.220279 |
| 5 | 0.551178  | -2.712005 | -1.067115 |
| 5 | 2.660902  | -0.344937 | -1.257339 |
| 5 | 1.089349  | 2.301514  | -1.549754 |
| 5 | -0.013515 | -0.260848 | -2.861558 |
| 5 | 0.013515  | 0.260848  | 2.861558  |
| 7 | -1.326851 | 0.501169  | 3.673536  |
| 7 | 1.326851  | -0.501169 | -3.673536 |
| 7 | 3.434553  | -1.847149 | 0.985549  |
| 5 | 3.253600  | -0.812392 | 2.245372  |
| 5 | 2.353254  | -3.164356 | 1.079012  |
| 6 | 1.595287  | -2.880471 | 2.452842  |
| 6 | 2.081919  | -1.489536 | 3.122145  |
| 6 | -2.081919 | 1.489536  | -3.122145 |
| 6 | -1.595287 | 2.880471  | -2.452842 |
| 7 | -3.434553 | 1.847149  | -0.985549 |
| 5 | -3.253600 | 0.812392  | -2.245372 |
| 5 | -2.033117 | 3.002516  | 1.735333  |
| 5 | 2.033117  | -3.002516 | -1.735333 |
| 7 | -0.810906 | -3.773659 | 1.070688  |
| 5 | -0.054840 | -3.251179 | 2.470567  |
| 6 | -2.530400 | -2.247268 | 2.242056  |
| 6 | -1.195569 | -2.330607 | 3.139748  |
| 6 | 1.195569  | 2.330607  | -3.139748 |
| 6 | 2.530400  | 2.247268  | -2.242056 |
| 5 | 0.054840  | 3.251179  | -2.470567 |
| 7 | 0.810906  | 3.773659  | -1.070688 |
| 5 | -2.718785 | 0.491457  | 2.895447  |
| 7 | -3.076838 | 1.756747  | 1.860310  |
| 6 | -3.330857 | -0.795477 | 2.155400  |
| 6 | -4.004462 | -0.351515 | 0.749986  |
| 5 | 2.396474  | 1.721476  | 2.873596  |
| 7 | -0.638497 | 3.004848  | 2.599722  |
| 7 | 3.436857  | 0.756484  | 2.045193  |
| 6 | 3.045794  | 2.757719  | 0.545218  |
| 6 | 2.205518  | 2.965254  | 1.878178  |
| 6 | -0.031531 | 4.009309  | 0.310263  |
| 5 | 0.702730  | 3.643836  | 1.688126  |
| 6 | -1.609986 | 3.691267  | 0.338893  |
| 6 | 4.004462  | 0.351515  | -0.749986 |
| 5 | 2.718785  | -0.491457 | -2.895447 |

|   |           |           |           |
|---|-----------|-----------|-----------|
| 6 | 3.330857  | 0.795477  | -2.155400 |
| 7 | 3.076838  | -1.756747 | -1.860310 |
| 7 | -3.436857 | -0.756484 | -2.045193 |
| 5 | -2.396474 | -1.721476 | -2.873596 |
| 6 | -2.205518 | -2.965254 | -1.878178 |
| 6 | -3.045794 | -2.757719 | -0.545218 |
| 6 | 1.609986  | -3.691267 | -0.338893 |
| 6 | 0.031531  | -4.009309 | -0.310263 |
| 7 | 0.638497  | -3.004848 | -2.599722 |
| 5 | -0.702730 | -3.643836 | -1.688126 |

7)

| Atomic<br>Number | Coordinates (Angstroms) |           |           |
|------------------|-------------------------|-----------|-----------|
|                  | X                       | Y         | Z         |
| 5                | -0.739482               | -1.454425 | -0.255519 |
| 5                | -0.743745               | -0.302496 | -1.648662 |
| 5                | 0.711646                | 1.430087  | -0.100770 |
| 5                | 0.836322                | 0.313014  | 1.244860  |
| 5                | -0.845805               | 1.247244  | -0.852522 |
| 5                | 0.836245                | -1.352928 | 0.593899  |
| 5                | -0.657964               | 1.100348  | 0.890482  |
| 5                | 0.739427                | 0.493597  | -1.572961 |
| 5                | -0.646131               | -0.587003 | 1.333197  |
| 5                | 0.660859                | -1.186725 | -1.118585 |
| 5                | -1.049720               | -3.380540 | -2.240534 |
| 5                | 0.333831                | -4.233000 | 0.099231  |
| 5                | -0.062576               | 1.326511  | 3.755817  |
| 5                | 1.184453                | 3.480976  | 2.016521  |
| 5                | 1.648613                | -1.201457 | 3.444507  |
| 5                | -1.655569               | 1.569683  | -3.029146 |
| 5                | 4.030346                | -0.514998 | -1.737482 |
| 5                | 0.501606                | -1.962965 | -3.630653 |
| 5                | 3.956773                | 1.703834  | -0.351221 |
| 6                | 1.533238                | -0.029457 | -0.222091 |
| 6                | -1.542039               | -0.017873 | -0.005376 |
| 6                | 4.242996                | 0.493961  | 0.617550  |
| 6                | 4.390916                | -0.775788 | -0.202111 |
| 5                | -1.031378               | 2.070091  | 2.284294  |
| 5                | -1.989447               | 2.543528  | -1.640260 |
| 5                | -1.723031               | -1.248694 | -3.295069 |
| 5                | -0.203092               | -1.134739 | 3.571768  |
| 5                | -1.247947               | -3.017808 | -0.495242 |
| 5                | 1.913623                | -2.795331 | 0.926536  |
| 5                | 1.392997                | 1.033407  | 2.656576  |
| 5                | 1.376241                | 2.894777  | 0.236701  |
| 5                | 0.181498                | 1.020404  | -3.564423 |
| 5                | 1.343719                | -2.732048 | -1.385694 |
| 5                | 3.036786                | 0.141551  | -0.456064 |
| 5                | -3.048994               | -0.026873 | 0.292429  |



|   |           |           |           |
|---|-----------|-----------|-----------|
| 7 | -3.671593 | -1.003001 | 1.718295  |
| 7 | 3.661066  | 1.030563  | -1.677122 |
| 5 | -0.992121 | 3.919610  | 0.083591  |
| 6 | -3.699114 | 2.346439  | -0.002404 |
| 6 | 3.898794  | -2.012384 | 0.337165  |
| 6 | -3.686887 | -0.263012 | -1.946757 |
| 6 | 3.596099  | 0.422284  | 1.942866  |
| 6 | -3.261103 | -2.665797 | -0.080526 |
| 6 | 3.184510  | 2.955870  | 0.142096  |
| 6 | -2.986479 | 1.315368  | 2.601707  |
| 6 | 3.116750  | -1.485557 | -2.512356 |
| 6 | -3.835805 | 0.511605  | 1.760607  |
| 6 | -3.981565 | -1.522994 | 0.383995  |
| 5 | -4.422324 | 1.038284  | 0.442551  |
| 5 | -4.456470 | -0.330706 | -0.594536 |
| 5 | -1.751430 | 0.678580  | 3.182844  |
| 6 | 0.399824  | 2.489836  | 2.904805  |
| 7 | -2.505561 | 2.594902  | 2.203618  |
| 5 | -1.778982 | -3.117901 | 1.981912  |
| 5 | -2.768993 | -2.555524 | -1.541908 |
| 6 | 0.075646  | -3.865956 | -1.260202 |
| 7 | -2.230429 | -3.406686 | 0.612571  |
| 7 | -2.973988 | -1.394617 | -2.396695 |
| 7 | -3.428575 | 2.354122  | -1.334188 |
| 5 | -3.278257 | 1.257636  | -2.260691 |
| 6 | -1.133357 | 0.123179  | -3.363886 |
| 6 | -0.909874 | 3.638636  | -1.480126 |
| 5 | -2.624595 | 3.120814  | 0.880159  |
| 7 | 3.253134  | -2.107827 | 1.541956  |
| 5 | 3.062018  | -2.970892 | -0.512211 |
| 6 | 0.730970  | -3.766270 | 1.450531  |
| 7 | 2.887868  | 1.496868  | 2.353275  |
| 5 | 3.046596  | -1.021445 | 2.451897  |
| 6 | 0.804149  | 0.017639  | 3.950455  |
| 7 | 2.230922  | 3.713830  | -0.682740 |
| 5 | 2.730407  | 2.794016  | 1.585590  |
| 6 | 0.248221  | 4.008860  | 0.964175  |
| 5 | 1.702268  | 3.106784  | -1.922922 |
| 7 | 2.761207  | -2.703639 | -1.857770 |
| 5 | 1.884024  | -0.962849 | -3.273913 |
| 6 | -0.819232 | -2.522647 | -3.460574 |
| 7 | 0.496491  | -2.348150 | 3.361683  |
| 6 | -0.120750 | -3.267197 | 2.426350  |
| 6 | -1.470822 | -0.767448 | 2.851039  |
| 5 | -2.556207 | -1.712457 | 2.442668  |
| 5 | 2.473549  | 1.617429  | -2.438193 |
| 6 | 0.134445  | 3.304447  | -2.369084 |
| 6 | 1.557939  | 0.582161  | -3.091962 |
| 7 | -0.388077 | 2.348004  | -3.329964 |

| Atomic<br>Number | Coordinates (Angstroms) |           |           |
|------------------|-------------------------|-----------|-----------|
|                  | X                       | Y         | Z         |
| 5                | -0.032327               | 1.262830  | 1.080742  |
| 5                | 1.372296                | 0.942392  | 0.082033  |
| 5                | 0.032327                | -1.262830 | -1.080742 |
| 5                | -1.372296               | -0.942392 | -0.082033 |
| 5                | 1.460807                | -0.788734 | -0.141942 |
| 5                | -1.460807               | 0.788734  | 0.141942  |
| 5                | 0.117350                | -1.500873 | 0.624160  |
| 5                | 0.864453                | 0.311728  | -1.414708 |
| 5                | -0.864453               | -0.311728 | 1.414708  |
| 5                | -0.117350               | 1.500873  | -0.624160 |
| 5                | 3.185345                | -1.228345 | -2.254437 |
| 5                | 0.355066                | 3.806121  | 0.631265  |
| 5                | -1.747583               | 3.646055  | -0.749652 |
| 5                | -3.185345               | 1.228345  | 2.254437  |
| 5                | -1.888951               | -3.303212 | 1.624910  |
| 5                | -0.355066               | -3.806121 | -0.631265 |
| 5                | -4.145902               | -0.084123 | 0.273588  |
| 5                | 4.145902                | 0.084123  | -0.273588 |
| 5                | 1.170792                | -1.321686 | 3.951484  |
| 5                | -1.170792               | 1.321686  | -3.951484 |
| 5                | 1.888951                | 3.303212  | -1.624910 |
| 6                | -0.818157               | 0.118015  | -1.281050 |
| 6                | 0.818157                | -0.118015 | 1.281050  |
| 6                | 2.597016                | -0.843495 | 3.464451  |
| 6                | -2.597016               | 0.843495  | -3.464451 |
| 5                | -0.021958               | -2.955872 | 1.427683  |
| 5                | 2.953500                | -1.572116 | -0.154909 |
| 5                | 2.607635                | 2.146793  | 0.074895  |
| 5                | -3.006574               | -1.282862 | 2.038350  |
| 5                | -1.933522               | 3.108053  | 1.632542  |
| 5                | -2.953500               | 1.572116  | 0.154909  |
| 5                | -2.607635               | -2.146793 | -0.074895 |
| 5                | 1.933522                | -3.108053 | -1.632542 |
| 5                | 3.006574                | 1.282862  | -2.038350 |
| 5                | 0.021958                | 2.955872  | -1.427683 |
| 5                | -1.405489               | 0.083288  | -2.691445 |
| 5                | 1.405489                | -0.083288 | 2.691445  |
| 7                | 0.344002                | -0.020540 | 3.972897  |
| 7                | -0.344002               | 0.020540  | -3.972897 |
| 7                | 3.209695                | -2.395106 | -1.325360 |
| 5                | 1.747583                | -3.646055 | 0.749652  |
| 6                | 2.618217                | -3.012420 | 1.813461  |
| 6                | -2.618217               | 3.012420  | -1.813461 |
| 7                | -3.209695               | 2.395106  | 1.325360  |
| 6                | 4.029440                | 0.631684  | 1.100556  |
| 7                | 3.091594                | 2.528180  | -1.270044 |
| 7                | -3.091594               | -2.528180 | 1.270044  |
| 6                | -4.029440               | -0.631684 | -1.100556 |

|   |           |           |           |
|---|-----------|-----------|-----------|
| 7 | -1.206955 | 3.847205  | 0.587889  |
| 6 | 1.171551  | 3.126060  | 1.835096  |
| 6 | -1.171551 | -3.126060 | -1.835096 |
| 7 | 1.206955  | -3.847205 | -0.587889 |
| 7 | -3.766681 | -0.049455 | 1.672690  |
| 6 | -1.984261 | 1.321360  | 3.292498  |
| 6 | 1.984261  | -1.321360 | -3.292498 |
| 7 | 3.766681  | 0.049455  | -1.672690 |
| 7 | -0.928799 | -3.912458 | 0.715605  |
| 6 | -1.038928 | -2.595850 | 2.800569  |
| 6 | 1.038928  | 2.595850  | -2.800569 |
| 7 | 0.928799  | 3.912458  | -0.715605 |
| 6 | 1.153341  | 1.199062  | 3.707499  |
| 5 | 2.648477  | 0.788594  | 3.500430  |
| 6 | -1.153341 | -1.199062 | -3.707499 |
| 5 | -2.648477 | -0.788594 | -3.500430 |
| 6 | -1.647301 | -1.189770 | 2.818625  |
| 5 | -1.161503 | 0.026446  | 3.598831  |
| 5 | 0.367721  | 2.353141  | 2.913421  |
| 6 | -1.210612 | 2.416654  | 2.877014  |
| 6 | 2.516145  | 2.698152  | 1.506513  |
| 5 | 3.365035  | 1.607100  | 2.216345  |
| 5 | 3.255115  | -1.646615 | 2.293220  |
| 6 | 3.865863  | -0.783112 | 1.044839  |
| 6 | 1.378230  | -3.433914 | 2.273384  |
| 5 | 0.386554  | -2.711687 | 3.328211  |
| 5 | -0.386554 | 2.711687  | -3.328211 |
| 6 | -1.378230 | 3.433914  | -2.273384 |
| 6 | -3.865863 | 0.783112  | -1.044839 |
| 5 | -3.255115 | 1.646615  | -2.293220 |
| 5 | -3.365035 | -1.607100 | -2.216345 |
| 6 | -2.516145 | -2.698152 | -1.506513 |
| 6 | 1.210612  | -2.416654 | -2.877014 |
| 5 | -0.367721 | -2.353141 | -2.913421 |
| 5 | 1.161503  | -0.026446 | -3.598831 |
| 6 | 1.647301  | 1.189770  | -2.818625 |

**S.4:** Global minimum structure and energy of  $C_{14}B_{58}N_{12}Li_{12}$  computed at B3LYP/6-31G\* level.

E=

| Atomic<br>Number | Coordinates (Angstroms) |           |           |
|------------------|-------------------------|-----------|-----------|
|                  | X                       | Y         | Z         |
| 5                | 1.105727                | 0.887288  | -0.828956 |
| 5                | 1.555883                | -0.082805 | 0.516926  |
| 5                | -1.105767               | -0.887387 | 0.828964  |
| 5                | -1.555881               | 0.082876  | -0.516838 |
| 6                | 0.218143                | -0.113413 | 1.537283  |
| 5                | 0.593069                | 1.335839  | 0.745919  |

|   |           |           |           |
|---|-----------|-----------|-----------|
| 6 | -0.218032 | 0.113345  | -1.537178 |
| 5 | -0.593068 | -1.335765 | -0.745812 |
| 5 | -1.056569 | 0.833767  | 0.945224  |
| 5 | 0.510214  | -1.463586 | 0.554162  |
| 5 | -0.510502 | 1.463777  | -0.553725 |
| 5 | 1.056616  | -0.834119 | -0.944634 |
| 6 | 1.026818  | 1.008788  | 3.832536  |
| 5 | -0.564516 | 0.623427  | 4.093150  |
| 5 | 2.014106  | -0.298867 | 3.658835  |
| 5 | 0.938059  | -1.681797 | 3.674459  |
| 5 | -0.672305 | -1.133385 | 4.036789  |
| 5 | 0.564778  | -0.623232 | -4.092792 |
| 5 | -2.014190 | 0.298769  | -3.658950 |
| 5 | 0.672390  | 1.133546  | -4.036993 |
| 5 | -0.937938 | 1.681580  | -3.674511 |
| 6 | -1.026775 | -1.008748 | -3.832306 |
| 5 | -2.045508 | -1.901338 | 3.282014  |
| 5 | -1.721542 | -3.229402 | 2.221650  |
| 5 | -2.743063 | -3.002903 | 0.818290  |
| 5 | -1.901484 | 1.587027  | 3.487598  |
| 5 | -1.526381 | 3.013395  | 2.528111  |
| 5 | -3.527123 | 1.752853  | 1.270835  |
| 5 | 2.752722  | 2.542756  | 1.976412  |
| 5 | 0.755971  | 4.072591  | 0.906808  |
| 5 | 0.148528  | 3.492486  | 2.442383  |
| 5 | 3.407756  | -0.244382 | 2.635061  |
| 5 | 3.762525  | 1.171728  | 1.746566  |
| 5 | 4.082009  | 0.666037  | 0.124481  |
| 5 | 2.011742  | -3.710672 | 0.171276  |
| 5 | -0.075525 | -3.751283 | 1.973677  |
| 5 | 0.396948  | -4.263227 | 0.382100  |
| 5 | 2.045462  | 1.901525  | -3.282193 |
| 5 | 1.721555  | 3.229394  | -2.221614 |
| 5 | 2.743086  | 3.002787  | -0.818353 |
| 5 | 1.901886  | -1.587104 | -3.487560 |
| 5 | 3.528293  | -1.751970 | -1.271248 |
| 5 | 1.525826  | -3.013795 | -2.529957 |
| 5 | -0.148855 | -3.492822 | -2.442646 |
| 5 | -0.755997 | -4.072720 | -0.907190 |
| 5 | -2.753040 | -2.542704 | -1.976377 |
| 5 | -3.407921 | 0.244678  | -2.635163 |
| 5 | -4.081872 | -0.665843 | -0.124423 |
| 5 | -3.762664 | -1.171494 | -1.746721 |
| 5 | -2.012136 | 3.711895  | -0.171964 |
| 5 | -0.396960 | 4.263301  | -0.382469 |
| 5 | 0.075504  | 3.750912  | -1.973861 |
| 7 | -2.041842 | -1.654393 | 1.595635  |
| 7 | 0.403298  | -0.246949 | 2.921097  |
| 7 | 0.943132  | -2.738377 | 1.039781  |
| 7 | 2.901891  | -0.127634 | 1.017125  |
| 7 | 1.104763  | 2.464396  | 1.457490  |
| 7 | -1.967384 | 1.514208  | 1.814777  |

|   |           |           |           |
|---|-----------|-----------|-----------|
| 7 | -0.943130 | 2.738843  | -1.039347 |
| 7 | 2.041718  | 1.654285  | -1.595802 |
| 7 | 1.967191  | -1.516970 | -1.812451 |
| 7 | -1.105034 | -2.464404 | -1.457120 |
| 7 | -2.901746 | 0.127785  | -1.017258 |
| 7 | -0.403050 | 0.246776  | -2.921002 |
| 5 | 1.385471  | 2.462939  | 3.087282  |
| 6 | 2.247607  | 3.428750  | 0.709510  |
| 6 | 4.012635  | -0.970792 | 0.089519  |
| 5 | 3.595793  | -1.588195 | 1.558319  |
| 5 | 2.534380  | -2.947740 | 1.644462  |
| 6 | 1.228723  | -2.962018 | 2.639669  |
| 6 | -3.621066 | -1.639175 | 1.111684  |
| 5 | -3.285650 | -0.924828 | 2.551996  |
| 5 | -3.241343 | 0.805946  | 2.708132  |
| 6 | -2.549004 | 3.051721  | 1.249042  |
| 6 | -2.247728 | -3.428735 | -0.709674 |
| 5 | -1.385651 | -2.462843 | -3.087162 |
| 6 | -4.012219 | 0.970875  | -0.089248 |
| 5 | -3.595546 | 1.588303  | -1.558206 |
| 5 | -2.534316 | 2.948031  | -1.644915 |
| 6 | -1.228713 | 2.961773  | -2.639860 |
| 6 | 3.621109  | 1.639166  | -1.111761 |
| 5 | 3.285344  | 0.924866  | -2.552117 |
| 5 | 3.241482  | -0.806021 | -2.708321 |
| 6 | 2.548446  | -3.050277 | -1.250038 |
| 3 | 2.066543  | 4.537407  | 2.678018  |
| 3 | 0.799194  | -0.429323 | 5.495772  |
| 3 | 5.407538  | -0.292061 | 1.665247  |
| 3 | 3.854200  | 3.076767  | -2.772149 |
| 3 | -1.762638 | 5.010679  | -1.958772 |
| 3 | -3.656564 | 2.914959  | 3.196025  |
| 3 | 1.763580  | -5.010115 | 1.957843  |
| 3 | -3.854077 | -3.076926 | 2.772041  |
| 3 | -0.798978 | 0.428800  | -5.495659 |
| 3 | -5.407639 | 0.292429  | -1.664616 |
| 3 | -2.066820 | -4.536747 | -2.678961 |
| 3 | 3.656538  | -2.916193 | -3.193650 |

**S.5:** Optimized geometry and energy of  $\text{CB}_4\text{LiNH}_6$  computed at B3LYP/6-31G\* level.

E=

| Atomic<br>Number | Coordinates (Angstroms) |           |           |
|------------------|-------------------------|-----------|-----------|
|                  | X                       | Y         | Z         |
| 6                | 0.003927                | -1.253484 | 0.171356  |
| 5                | -0.853270               | 1.183359  | 0.119634  |
| 1                | 0.000160                | -0.198082 | -1.850683 |
| 1                | -1.513680               | 1.997059  | -0.457754 |

|   |           |           |           |
|---|-----------|-----------|-----------|
| 1 | -2.328179 | -0.937883 | -0.281261 |
| 1 | 0.006535  | -2.240204 | -0.293786 |
| 1 | 2.334199  | -0.923276 | -0.281676 |
| 1 | 1.501340  | 2.006010  | -0.458207 |
| 5 | 0.845901  | 1.188455  | 0.119372  |
| 5 | 1.350542  | -0.419588 | 0.172622  |
| 7 | -0.000112 | -0.027702 | -0.845428 |
| 5 | -1.347803 | -0.427710 | 0.172864  |
| 3 | -0.000002 | 0.129534  | 1.863588  |

**S.6:** Optimized structure and energy of CBN cluster with some borons replaced by Al atoms done at B3LYP/6-31G\* level.

E=

| Atomic<br>Number | Coordinates (Angstroms) |           |           |
|------------------|-------------------------|-----------|-----------|
|                  | X                       | Y         | Z         |
| 5                | -1.375019               | -0.332417 | 0.706841  |
| 5                | -0.735222               | 1.209446  | 0.737686  |
| 5                | 1.385362                | 0.349869  | -0.696803 |
| 5                | 0.740119                | -1.192509 | -0.713205 |
| 5                | 0.937535                | 1.077193  | 0.719280  |
| 5                | -0.929971               | -1.060182 | -0.696230 |
| 5                | 1.323871                | -0.546816 | 0.681895  |
| 5                | 0.106559                | 1.427360  | -0.660640 |
| 5                | -0.101973               | -1.415899 | 0.674593  |
| 5                | -1.323745               | 0.566425  | -0.670773 |
| 5                | -1.264589               | 0.661713  | -3.873117 |
| 5                | 1.349080                | 0.157775  | -3.893823 |
| 6                | -0.010530               | 0.028829  | -1.429544 |
| 6                | 0.013681                | -0.022293 | 1.452415  |
| 6                | 0.528404                | -1.179084 | -3.840342 |
| 6                | -0.997725               | -0.883313 | -3.832815 |
| 5                | 2.491369                | -1.213596 | 1.433745  |
| 5                | 1.933716                | 1.977884  | 1.483575  |
| 5                | -1.266313               | 2.430286  | 1.521047  |
| 5                | -0.345831               | -2.741961 | 1.412121  |
| 5                | -2.706910               | -0.501609 | 1.458949  |
| 5                | -1.927583               | -1.959784 | -1.449943 |
| 5                | 1.275590                | -2.412577 | -1.486252 |
| 5                | 2.714161                | 0.493795  | -1.474720 |
| 5                | 0.347512                | 2.727852  | -1.443504 |
| 5                | -2.493518               | 1.228353  | -1.438383 |
| 5                | -0.029135               | -0.002963 | -2.877702 |
| 5                | 0.031139                | -0.045040 | 2.906449  |
| 7                | -0.209469               | -1.320507 | 3.768713  |
| 7                | 0.210088                | 1.271943  | -3.788334 |
| 6                | 2.179011                | 1.812784  | 3.147642  |
| 6                | -2.076301               | -1.746708 | -3.124935 |
| 6                | -1.080989               | 2.562499  | 3.197358  |

|    |           |           |           |
|----|-----------|-----------|-----------|
| 6  | 1.016053  | -2.477011 | -3.155574 |
| 6  | -2.674839 | -0.263033 | 3.146201  |
| 6  | 2.774808  | 0.261207  | -3.160074 |
| 6  | -0.589435 | -2.635207 | 3.082610  |
| 6  | 0.595773  | 2.594805  | -3.107666 |
| 6  | 2.347498  | -1.445800 | 3.099945  |
| 6  | -2.439888 | 1.455002  | -3.121630 |
| 6  | 1.258206  | -0.643529 | 3.806320  |
| 6  | -1.313997 | -0.152227 | 3.844324  |
| 5  | 1.098848  | 0.891182  | 3.935879  |
| 5  | -0.593862 | 1.212284  | 3.963350  |
| 5  | 2.070599  | -2.779026 | 2.387332  |
| 6  | 4.075034  | -1.217020 | 1.160396  |
| 7  | 3.448210  | -0.506490 | 2.415191  |
| 7  | 0.602317  | -3.392252 | 2.435212  |
| 6  | 0.098818  | -4.246102 | 1.141077  |
| 5  | -1.977746 | -2.777784 | 2.417325  |
| 5  | -3.239777 | 1.025652  | 2.461880  |
| 6  | -3.997366 | -1.411397 | 1.191440  |
| 7  | -3.043713 | -1.619019 | 2.466223  |
| 7  | -2.487592 | 2.436921  | 2.465818  |
| 7  | 1.577424  | 3.117123  | 2.448012  |
| 5  | -0.030409 | 3.440290  | 2.455272  |
| 6  | -2.576898 | 3.345657  | 1.204162  |
| 6  | 2.410259  | 3.491691  | 1.165590  |
| 5  | 3.327172  | 1.117064  | 2.395008  |
| 7  | -1.554351 | -3.069604 | -2.453774 |
| 5  | -3.279104 | -1.067195 | -2.407600 |
| 6  | -2.418833 | -3.465976 | -1.181614 |
| 7  | 2.455050  | -2.385438 | -2.482172 |
| 5  | 0.009746  | -3.410929 | -2.446171 |
| 6  | 2.559539  | -3.344146 | -1.225968 |
| 7  | 3.089866  | 1.619989  | -2.455212 |
| 5  | 3.287779  | -1.008509 | -2.440694 |
| 6  | 4.002476  | 1.429091  | -1.189700 |
| 6  | -0.110266 | 4.234228  | -1.187045 |
| 5  | 1.986574  | 2.769974  | -2.439246 |
| 7  | -0.613160 | 3.370180  | -2.458422 |
| 7  | -3.478056 | 0.523055  | -2.395293 |
| 5  | -2.102602 | 2.770544  | -2.397750 |
| 6  | -4.084326 | 1.214236  | -1.128035 |
| 13 | -4.521462 | 0.447682  | 0.785109  |
| 13 | -0.981161 | 4.431428  | 0.754442  |
| 13 | 3.937904  | 2.320514  | 0.712062  |
| 13 | 3.408853  | -3.020145 | 0.692838  |
| 13 | -1.827659 | -4.155971 | 0.728863  |
| 13 | 0.973607  | -4.440802 | -0.796327 |
| 13 | 4.526879  | -0.427474 | -0.745472 |
| 13 | 1.816247  | 4.154474  | -0.756878 |
| 13 | -3.418122 | 3.025652  | -0.688815 |
| 13 | -3.943733 | -2.291906 | -0.741000 |

S.7: Optimized structure and energy of CBN cluster with some carbons replaced by Si atoms done at B3LYP/6-31G\* level.

E=

| Atomic<br>Number | Coordinates (Angstroms) |           |           |
|------------------|-------------------------|-----------|-----------|
|                  | X                       | Y         | Z         |
| 5                | -0.862457               | 1.319500  | -0.027624 |
| 5                | -0.761640               | 0.393819  | 1.321556  |
| 5                | 0.862325                | -1.319537 | 0.027622  |
| 5                | 0.761504                | -0.393747 | -1.321512 |
| 5                | -0.611711               | -1.176345 | 0.858412  |
| 5                | 0.611705                | 1.176431  | -0.858305 |
| 5                | -0.612554               | -1.213536 | -0.781798 |
| 5                | 0.764771                | -0.326431 | 1.322636  |
| 5                | -0.764840               | 0.326397  | -1.322518 |
| 5                | 0.612432                | 1.213527  | 0.781869  |
| 5                | 0.837899                | -1.982253 | 3.556013  |
| 5                | -0.988576               | 3.953700  | 0.850600  |
| 5                | 0.247862                | 3.827859  | -1.686397 |
| 5                | -0.837801               | 1.982170  | -3.555942 |
| 5                | -0.363984               | -2.818237 | -3.058792 |
| 5                | 0.988752                | -3.953596 | -0.850548 |
| 5                | 0.641951                | -0.373740 | -4.104141 |
| 5                | -0.641882               | 0.373613  | 4.104162  |
| 5                | 0.364082                | 2.818276  | 3.058886  |
| 6                | 1.554349                | 0.146881  | -0.008269 |
| 6                | -1.554475               | -0.146821 | 0.008463  |
| 5                | -1.214760               | -2.409863 | -1.541667 |
| 5                | -1.224410               | -2.338823 | 1.665495  |
| 5                | -1.526260               | 0.747764  | 2.611366  |
| 5                | -1.517411               | 0.618526  | -2.639686 |
| 5                | -1.723971               | 2.606640  | -0.047280 |
| 5                | 1.224305                | 2.338886  | -1.665409 |
| 5                | 1.526145                | -0.747790 | -2.611283 |
| 5                | 1.723953                | -2.606599 | 0.047318  |
| 5                | 1.517545                | -0.618563 | 2.639712  |
| 5                | 1.214626                | 2.409797  | 1.541842  |
| 5                | 3.103514                | 0.320748  | -0.018642 |
| 5                | -3.103666               | -0.320754 | 0.018423  |
| 7                | -4.026801               | -0.225966 | -1.274899 |
| 7                | 4.026864                | 0.225602  | 1.274661  |
| 5                | -0.247720               | -3.827699 | 1.686400  |
| 6                | -3.951880               | -1.609672 | -0.685508 |
| 5                | -4.109527               | -1.591779 | 0.848532  |
| 5                | -4.278492               | -0.035710 | 1.423447  |
| 5                | -1.834375               | -1.926908 | -3.132174 |
| 6                | -0.342650               | -3.797045 | -1.770440 |
| 7                | -1.684192               | -3.705051 | -0.918655 |
| 7                | -2.031907               | -0.425690 | -3.581017 |



|    |           |           |           |
|----|-----------|-----------|-----------|
| 6  | -0.759985 | 0.471397  | -4.104865 |
| 5  | -2.218276 | 2.237106  | -2.497697 |
| 5  | -2.302080 | 3.012817  | 1.583978  |
| 6  | -1.066227 | 3.989089  | -0.751095 |
| 7  | -2.344518 | 3.230741  | -1.282952 |
| 7  | -2.246247 | 2.070045  | 2.865319  |
| 7  | -1.813833 | -2.220672 | 3.068438  |
| 5  | -1.948246 | -0.683500 | 3.613631  |
| 6  | -0.868619 | 1.898228  | 3.628238  |
| 6  | -0.398363 | -2.897916 | 3.001284  |
| 5  | -1.651441 | -3.791663 | 0.705670  |
| 7  | 1.813775  | 2.220681  | -3.068422 |
| 5  | 1.651575  | 3.791778  | -0.705728 |
| 6  | 0.398496  | 2.897898  | -3.001282 |
| 7  | 2.246199  | -2.070017 | -2.865296 |
| 5  | 1.948342  | 0.683415  | -3.613654 |
| 6  | 0.868745  | -1.898301 | -3.628116 |
| 7  | 2.344538  | -3.230517 | 1.282993  |
| 5  | 2.302572  | -3.012655 | -1.583887 |
| 6  | 1.066345  | -3.989112 | 0.751098  |
| 6  | 0.760010  | -0.471506 | 4.104937  |
| 5  | 2.218349  | -2.237231 | 2.497920  |
| 7  | 2.031970  | 0.425681  | 3.581022  |
| 7  | 1.684358  | 3.704893  | 0.918690  |
| 5  | 1.834423  | 1.926919  | 3.132263  |
| 6  | 0.342885  | 3.797108  | 1.770427  |
| 14 | -3.588130 | 0.606841  | -2.983182 |
| 14 | -3.731683 | 3.205434  | 0.090762  |
| 14 | -3.512136 | 0.498938  | 3.206368  |
| 14 | -3.135833 | -3.101273 | 1.835822  |
| 14 | -3.181969 | -2.907752 | -1.929762 |
| 14 | 3.588329  | -0.606835 | 2.983312  |
| 14 | 3.731931  | -3.204780 | -0.090630 |
| 14 | 3.511916  | -0.498303 | -3.206460 |
| 14 | 3.135838  | 3.101075  | -1.835768 |
| 14 | 3.181953  | 2.907454  | 1.929724  |
| 6  | 3.952034  | 1.609307  | 0.685485  |
| 5  | 4.278388  | 0.035733  | -1.423623 |
| 5  | 4.109464  | 1.591685  | -0.848562 |
| 14 | 4.764262  | -1.035187 | 0.083287  |
| 14 | -4.765009 | 1.034668  | -0.083883 |

**S.8:** Optimized structure and energy of CBN cluster with some nitrogens replaced by P atoms done at B3LYP/6-31G\* level.

E=

| Atomic<br>Number | Coordinates (Angstroms) |          |          |
|------------------|-------------------------|----------|----------|
|                  | X                       | Y        | Z        |
| 5                | -0.127417               | 1.395394 | 0.838020 |

|   |           |           |           |
|---|-----------|-----------|-----------|
| 5 | 1.373699  | 0.845754  | 0.213246  |
| 5 | 0.127417  | -1.395394 | -0.838020 |
| 5 | -1.373699 | -0.845754 | -0.213246 |
| 5 | 1.348415  | -0.871362 | 0.212251  |
| 5 | -1.348415 | 0.871362  | -0.212251 |
| 5 | -0.160814 | -1.392914 | 0.847922  |
| 5 | 1.081747  | -0.012788 | -1.226699 |
| 5 | -1.081747 | 0.012788  | 1.226699  |
| 5 | 0.160814  | 1.392914  | -0.847922 |
| 5 | 3.429689  | -1.172228 | -2.355316 |
| 5 | -3.197934 | 1.799214  | -2.111523 |
| 5 | 0.233457  | 4.227013  | 0.902288  |
| 5 | -2.373340 | 3.182994  | -1.507356 |
| 5 | -2.730428 | 3.345505  | 0.088829  |
| 5 | 0.224729  | -2.786086 | 3.360112  |
| 5 | -2.138979 | 1.580922  | 3.286131  |
| 5 | 2.373340  | -3.182994 | 1.507356  |
| 5 | 3.197934  | -1.799214 | 2.111523  |
| 5 | 0.465576  | 2.852363  | 3.270328  |
| 5 | -1.327148 | -3.547060 | -1.927232 |
| 5 | 2.730428  | -3.345505 | -0.088829 |
| 5 | -3.429689 | 1.172228  | 2.355316  |
| 5 | -0.224729 | 2.786086  | -3.360112 |
| 5 | -1.538190 | 0.115745  | 4.058009  |
| 5 | -3.551702 | -1.651918 | -1.944142 |
| 5 | -1.860442 | -3.508732 | 1.750199  |
| 5 | -4.131483 | -0.599114 | -0.760734 |
| 5 | -0.233457 | -4.227013 | -0.902288 |
| 5 | -4.025581 | -1.415242 | 0.661669  |
| 5 | 1.476764  | 2.575586  | -3.045433 |
| 5 | 4.025581  | 1.415242  | -0.661669 |
| 5 | -0.465576 | -2.852363 | -3.270328 |
| 5 | 4.131483  | 0.599114  | 0.760734  |
| 5 | 3.551702  | 1.651918  | 1.944142  |
| 5 | 1.538190  | -0.115745 | -4.058009 |
| 5 | 1.073724  | -1.395814 | 3.975989  |
| 5 | 2.138979  | -1.580922 | -3.286131 |
| 5 | 0.170503  | 0.012244  | 4.338690  |
| 5 | 0.996212  | 1.386148  | 4.014947  |
| 5 | -1.476764 | -2.575586 | 3.045433  |
| 5 | -1.073724 | 1.395814  | -3.975989 |
| 5 | 1.327148  | 3.547060  | 1.927232  |
| 5 | 1.860442  | 3.508732  | -1.750199 |
| 5 | -0.996212 | -1.386148 | -4.014947 |
| 5 | -0.170503 | -0.012244 | -4.338690 |
| 6 | -0.611274 | -0.005603 | -1.471258 |
| 6 | 0.611274  | 0.005603  | 1.471258  |
| 6 | -1.137756 | 0.020572  | -2.882270 |
| 6 | 0.143839  | -2.675577 | -1.636455 |
| 6 | -2.686269 | -1.544099 | -0.467654 |
| 6 | -2.542729 | 1.729049  | -0.514372 |
| 6 | 0.351865  | 2.624028  | -1.709780 |

|    |           |           |           |
|----|-----------|-----------|-----------|
| 6  | 2.047032  | -0.099528 | -2.385941 |
| 6  | -0.143839 | 2.675577  | 1.636455  |
| 6  | -2.047032 | 0.099528  | 2.385941  |
| 6  | -0.351865 | -2.624028 | 1.709780  |
| 6  | 2.542729  | -1.729049 | 0.514372  |
| 6  | 2.686269  | 1.544099  | 0.467654  |
| 6  | 1.137756  | -0.020572 | 2.882270  |
| 6  | -2.397247 | 0.978807  | -3.263120 |
| 6  | -3.920110 | 1.026047  | -0.952493 |
| 6  | -0.904088 | 3.489020  | -2.160528 |
| 6  | 2.171704  | 1.127221  | -3.403055 |
| 6  | 1.057757  | -2.778067 | -2.936679 |
| 6  | -2.743902 | -2.856166 | -1.389889 |
| 6  | 0.904088  | -3.489020 | 2.160528  |
| 6  | 3.920110  | -1.026047 | 0.952493  |
| 6  | 2.743902  | 2.856166  | 1.389889  |
| 6  | -1.057757 | 2.778067  | 2.936679  |
| 6  | -2.171704 | -1.127221 | 3.403055  |
| 6  | 2.397247  | -0.978807 | 3.263120  |
| 15 | -2.781926 | -0.831073 | -3.541733 |
| 15 | 2.781926  | 0.831073  | 3.541733  |
| 15 | -3.287849 | -3.178567 | 0.407794  |
| 15 | -4.049067 | 2.052688  | 0.654416  |
| 15 | 0.344791  | 4.482391  | -1.073156 |
| 15 | 3.835888  | 0.708879  | -2.503327 |
| 15 | 1.562911  | -4.026522 | -1.565563 |
| 15 | 4.049067  | -2.052688 | -0.654416 |
| 15 | -0.344791 | -4.482391 | 1.073156  |
| 15 | -3.835888 | -0.708879 | 2.503327  |
| 15 | -1.562911 | 4.026522  | 1.565563  |
| 15 | 3.287849  | 3.178567  | -0.407794 |

**S.9:** Optimized structures of B84 based stuffed CBN clusters formed from each of the eight pentagonal pyramid isomers calculated at B3LYP/6-31G\* level.

CBN clusters from pentagonal pyramid isomer I

1a

| Atomic<br>Number | Coordinates (Angstroms) |           |           |
|------------------|-------------------------|-----------|-----------|
|                  | X                       | Y         | Z         |
| 5                | -0.250955               | 1.268262  | 1.123855  |
| 5                | 1.192144                | 0.928412  | 0.211674  |
| 5                | 0.250955                | -1.268262 | -1.123855 |
| 5                | -1.192144               | -0.928412 | -0.211674 |
| 5                | 1.483129                | -0.739553 | 0.037216  |
| 5                | -1.483129               | 0.739553  | -0.037216 |
| 5                | 0.131599                | -1.517667 | 0.746964  |

|   |           |           |           |
|---|-----------|-----------|-----------|
| 5 | 1.031177  | 0.323660  | -1.360263 |
| 5 | -1.031177 | -0.323660 | 1.360263  |
| 5 | -0.131599 | 1.517667  | -0.746964 |
| 5 | -3.161806 | 1.840133  | -1.968916 |
| 5 | -2.589853 | 3.355677  | -1.456296 |
| 5 | 0.092370  | -2.714606 | 3.210371  |
| 5 | -2.585178 | 1.625980  | 2.843873  |
| 5 | 2.589853  | -3.355677 | 1.456296  |
| 5 | 3.161806  | -1.840133 | 1.968916  |
| 5 | 1.007800  | 2.667457  | 3.149641  |
| 5 | -1.065094 | -3.563510 | -1.728940 |
| 5 | -0.092370 | 2.714606  | -3.210371 |
| 5 | -1.027881 | 0.312004  | 4.421323  |
| 5 | -3.467173 | -1.442257 | -1.975770 |
| 5 | -4.335913 | -0.551872 | -0.808536 |
| 5 | 1.547843  | 2.404938  | -2.674815 |
| 5 | -1.007800 | -2.667457 | -3.149641 |
| 5 | 4.335913  | 0.551872  | 0.808536  |
| 5 | 3.467173  | 1.442257  | 1.975770  |
| 5 | 1.027881  | -0.312004 | -4.421323 |
| 5 | 1.132558  | -1.364377 | 3.860785  |
| 5 | 2.585178  | -1.625980 | -2.843873 |
| 5 | 0.564988  | 0.054871  | 4.625724  |
| 5 | 1.562873  | 1.303715  | 4.012735  |
| 5 | -1.547843 | -2.404938 | 2.674815  |
| 5 | -1.132558 | 1.364377  | -3.860785 |
| 5 | 1.065094  | 3.563510  | 1.728940  |
| 5 | -1.562873 | -1.303715 | -4.012735 |
| 5 | -0.564988 | -0.054871 | -4.625724 |
| 6 | -0.632748 | 0.101687  | -1.415403 |
| 6 | 0.632748  | -0.101687 | 1.415403  |
| 6 | 2.513201  | -0.947545 | 3.132371  |
| 6 | 2.646066  | 0.573709  | 3.118616  |
| 6 | -2.646066 | -0.573709 | -3.118616 |
| 6 | -2.513201 | 0.947545  | -3.132371 |
| 6 | -2.977251 | -2.689914 | 0.293012  |
| 6 | 2.977251  | 2.689914  | -0.293012 |
| 6 | -3.580009 | 1.959743  | 0.450710  |
| 6 | 3.580009  | -1.959743 | -0.450710 |
| 6 | -0.602696 | -3.573146 | 0.693616  |
| 6 | 0.602696  | 3.573146  | -0.693616 |
| 6 | 1.550379  | -3.601812 | -0.943996 |
| 6 | -1.550379 | 3.601812  | 0.943996  |
| 6 | -3.307914 | -0.327005 | 1.659938  |
| 6 | 3.307914  | 0.327005  | -1.659938 |
| 7 | 2.082662  | -0.474739 | -3.650281 |
| 7 | 0.066528  | -2.287718 | -2.209032 |
| 7 | -2.460919 | -1.500445 | -0.508554 |
| 7 | -2.734149 | 1.222024  | -0.540578 |
| 7 | -0.324381 | 2.770672  | -1.497296 |
| 7 | -0.066528 | 2.287718  | 2.209032  |
| 7 | 2.460919  | 1.500445  | 0.508554  |

|   |           |           |           |
|---|-----------|-----------|-----------|
| 7 | 2.734149  | -1.222024 | 0.540578  |
| 7 | 0.324381  | -2.770672 | 1.497296  |
| 7 | -2.082662 | 0.474739  | 3.650281  |
| 7 | 1.254647  | -0.102574 | 2.685478  |
| 7 | -1.254647 | 0.102574  | -2.685478 |
| 6 | -3.665980 | -1.264841 | 0.490368  |
| 5 | -2.740841 | -2.859844 | -1.337215 |
| 5 | 1.509447  | -2.791566 | -2.232702 |
| 5 | 2.217845  | 0.829102  | -2.665949 |
| 5 | -1.295016 | 3.530237  | -2.412088 |
| 5 | -4.265078 | 1.177859  | -0.809560 |
| 6 | -2.659322 | 3.278003  | 0.135977  |
| 6 | 1.857077  | 3.121533  | -1.227878 |
| 6 | 3.448450  | -1.109236 | -1.706933 |
| 6 | -0.021915 | -3.899196 | -0.585785 |
| 6 | 0.021915  | 3.899196  | 0.585785  |
| 5 | -1.509447 | 2.791566  | 2.232702  |
| 5 | 2.740841  | 2.859844  | 1.337215  |
| 6 | 3.665980  | 1.264841  | -0.490368 |
| 6 | 2.659322  | -3.278003 | -0.135977 |
| 5 | 4.265078  | -1.177859 | 0.809560  |
| 5 | 1.295016  | -3.530237 | 2.412088  |
| 6 | -1.857077 | -3.121533 | 1.227878  |
| 6 | -3.448450 | 1.109236  | 1.706933  |
| 5 | -2.217845 | -0.829102 | 2.665949  |

1b

| Atomic<br>Number | Coordinates (Angstroms) |           |           |
|------------------|-------------------------|-----------|-----------|
|                  | X                       | Y         | Z         |
| 5                | -0.100365               | 1.392735  | 0.810863  |
| 5                | 1.361629                | 0.816548  | 0.170268  |
| 5                | 0.100365                | -1.392735 | -0.810863 |
| 5                | -1.361629               | -0.816548 | -0.170268 |
| 5                | 1.318886                | -0.876309 | 0.185144  |
| 5                | -1.318886               | 0.876309  | -0.185144 |
| 5                | -0.166878               | -1.371696 | 0.833096  |
| 5                | 1.052945                | -0.034830 | -1.219509 |
| 5                | -1.052945               | 0.034830  | 1.219509  |
| 5                | 0.166878                | 1.371696  | -0.833096 |
| 5                | 3.529751                | -1.111745 | -2.224604 |
| 5                | 0.085653                | 4.256178  | 0.786789  |
| 5                | -2.323885               | 3.148532  | -1.410812 |
| 5                | -2.742028               | 3.288551  | 0.259221  |
| 5                | -2.179057               | 1.552156  | 3.206967  |
| 5                | 2.323885                | -3.148532 | 1.410812  |
| 5                | -1.248107               | -3.543909 | -1.833647 |
| 5                | 2.742028                | -3.288551 | -0.259221 |
| 5                | -3.529751               | 1.111745  | 2.224604  |
| 5                | -1.869730               | -3.542349 | 1.549261  |

|   |           |           |           |
|---|-----------|-----------|-----------|
| 5 | -4.051097 | -0.594796 | -0.709316 |
| 5 | -0.085653 | -4.256178 | -0.786789 |
| 5 | -3.962746 | -1.501170 | 0.747742  |
| 5 | 1.491507  | 2.567697  | -2.927802 |
| 5 | 3.962746  | 1.501170  | -0.747742 |
| 5 | 4.051097  | 0.594796  | 0.709316  |
| 5 | 0.967287  | -1.351993 | 3.721270  |
| 5 | 2.179057  | -1.552156 | -3.206967 |
| 5 | 0.092827  | 0.055201  | 4.135340  |
| 5 | 1.067588  | 1.379197  | 3.676467  |
| 5 | -1.491507 | -2.567697 | 2.927802  |
| 5 | -0.967287 | 1.351993  | -3.721270 |
| 5 | 1.248107  | 3.543909  | 1.833647  |
| 5 | 1.869730  | 3.542349  | -1.549261 |
| 5 | -1.067588 | -1.379197 | -3.676467 |
| 5 | -0.092827 | -0.055201 | -4.135340 |
| 6 | -0.571085 | 0.001247  | -1.334745 |
| 6 | 0.571085  | -0.001247 | 1.334745  |
| 6 | 2.354192  | -0.833496 | 2.995514  |
| 6 | 2.415046  | 0.735071  | 2.968194  |
| 6 | -2.415046 | -0.735071 | -2.968194 |
| 6 | -2.354192 | 0.833496  | -2.995514 |
| 6 | -2.680751 | -2.823982 | -1.276638 |
| 6 | 2.680751  | 2.823982  | 1.276638  |
| 6 | -3.882741 | 1.062772  | -0.768173 |
| 6 | 3.882741  | -1.062772 | 0.768173  |
| 6 | 0.795667  | -3.534258 | 1.993848  |
| 6 | -0.795667 | 3.534258  | -1.993848 |
| 6 | 1.112472  | -2.829690 | -2.781064 |
| 6 | -1.112472 | 2.829690  | 2.781064  |
| 6 | -2.298150 | -1.091759 | 3.245759  |
| 6 | 2.298150  | 1.091759  | -3.245759 |
| 7 | 1.923121  | -0.115727 | -2.293514 |
| 7 | 0.117875  | -2.571459 | -1.541919 |
| 7 | -2.581948 | -1.431551 | -0.405576 |
| 7 | -2.442601 | 1.639816  | -0.460580 |
| 7 | 0.324872  | 2.498823  | -1.626892 |
| 7 | -0.117875 | 2.571459  | 1.541919  |
| 7 | 2.581948  | 1.431551  | 0.405576  |
| 7 | 2.442601  | -1.639816 | 0.460580  |
| 7 | -0.324872 | -2.498823 | 1.626892  |
| 7 | -1.923121 | 0.115727  | 2.293514  |
| 7 | 1.060389  | -0.001716 | 2.592855  |
| 7 | -1.060389 | 0.001716  | -2.592855 |
| 5 | 3.562254  | 0.616445  | -2.290563 |
| 6 | 1.534971  | -0.159224 | -3.800663 |
| 6 | -0.147846 | 2.651607  | -3.104808 |
| 6 | -3.034924 | 1.734496  | -1.894818 |
| 6 | -3.210740 | -1.464126 | -1.826789 |
| 6 | -0.434330 | -2.738885 | -2.993793 |
| 5 | 0.358164  | 4.169858  | -0.999195 |
| 5 | -3.773644 | 1.953839  | 0.624412  |

|   |           |           |           |
|---|-----------|-----------|-----------|
| 5 | -3.078888 | -2.928009 | 0.324095  |
| 5 | 1.431602  | -3.753207 | -1.445222 |
| 5 | -3.562254 | -0.616445 | 2.290563  |
| 6 | -1.534971 | 0.159224  | 3.800663  |
| 5 | -1.431602 | 3.753207  | 1.445222  |
| 6 | 0.434330  | 2.738885  | 2.993793  |
| 6 | 3.210740  | 1.464126  | 1.826789  |
| 5 | 3.078888  | 2.928009  | -0.324095 |
| 5 | 3.773644  | -1.953839 | -0.624412 |
| 6 | 3.034924  | -1.734496 | 1.894818  |
| 6 | 0.147846  | -2.651607 | 3.104808  |
| 5 | -0.358164 | -4.169858 | 0.999195  |

1c

| Atomic<br>Number | Coordinates (Angstroms) |           |           |
|------------------|-------------------------|-----------|-----------|
|                  | X                       | Y         | Z         |
| 5                | -1.071475               | 0.824072  | 0.833020  |
| 5                | -0.514124               | -0.647214 | 1.356101  |
| 5                | 1.071475                | -0.824072 | -0.833020 |
| 5                | 0.514124                | 0.647214  | -1.356101 |
| 6                | -0.164685               | -1.495948 | 0.000000  |
| 5                | -1.494723               | -0.555063 | 0.000000  |
| 6                | 0.164685                | 1.495948  | 0.000000  |
| 5                | 1.494723                | 0.555063  | 0.000000  |
| 5                | -0.514124               | -0.647214 | -1.356101 |
| 5                | 1.071475                | -0.824072 | 0.833020  |
| 5                | -1.071475               | 0.824072  | -0.833020 |
| 5                | 0.514124                | 0.647214  | 1.356101  |
| 5                | 2.004908                | 3.848700  | 0.000000  |
| 6                | -2.566132               | 1.058048  | -2.947079 |
| 6                | -0.623519               | 3.868596  | 0.785615  |
| 6                | -0.623519               | 3.868596  | -0.785615 |
| 5                | -2.004908               | -3.848700 | 0.000000  |
| 6                | 2.566132                | -1.058048 | -2.947079 |
| 6                | 0.623519                | -3.868596 | 0.785615  |
| 6                | 0.623519                | -3.868596 | -0.785615 |
| 6                | 2.469193                | 1.801269  | 2.675239  |
| 6                | 2.469193                | 1.801269  | -2.675239 |
| 6                | 1.235692                | 2.771503  | -2.668704 |
| 5                | 0.004898                | 2.128873  | -3.560891 |
| 5                | -0.004898               | -2.128873 | 3.560891  |
| 6                | 1.235692                | 2.771503  | 2.668704  |
| 6                | -1.235692               | -2.771503 | 2.668704  |
| 6                | -2.469193               | -1.801269 | 2.675239  |
| 5                | -0.004898               | -2.128873 | -3.560891 |
| 5                | -3.381552               | -2.772526 | 0.000000  |
| 5                | 0.004898                | 2.128873  | 3.560891  |
| 6                | -3.956793               | -0.234197 | -0.781930 |
| 6                | -3.956793               | -0.234197 | 0.781930  |
| 5                | 3.381552                | 2.772526  | 0.000000  |

|   |           |           |           |
|---|-----------|-----------|-----------|
| 6 | -2.566132 | 1.058048  | 2.947079  |
| 6 | 3.956793  | 0.234197  | -0.781930 |
| 6 | 2.566132  | -1.058048 | 2.947079  |
| 6 | 3.956793  | 0.234197  | 0.781930  |
| 5 | -0.923890 | -3.753330 | 1.317970  |
| 5 | -0.923890 | -3.753330 | -1.317970 |
| 5 | -3.529986 | -1.716973 | 1.332062  |
| 5 | -3.529986 | -1.716973 | -1.332062 |
| 5 | -0.548688 | -0.687010 | 4.281142  |
| 5 | -2.075054 | -0.472697 | 3.545299  |
| 6 | 1.590463  | -2.278739 | 2.953469  |
| 5 | 0.923890  | 3.753330  | 1.317970  |
| 5 | 0.923890  | 3.753330  | -1.317970 |
| 5 | 3.529986  | 1.716973  | -1.332062 |
| 5 | 3.529986  | 1.716973  | 1.332062  |
| 5 | 0.548688  | 0.687010  | -4.281142 |
| 5 | 2.075054  | 0.472697  | -3.545299 |
| 5 | 0.548688  | 0.687010  | 4.281142  |
| 5 | 1.937299  | -3.241033 | 1.666859  |
| 5 | 3.341590  | -2.678292 | 0.879556  |
| 5 | 3.589870  | -1.186004 | 1.665480  |
| 5 | 3.341590  | -2.678292 | -0.879556 |
| 5 | 1.937299  | -3.241033 | -1.666859 |
| 5 | 3.589870  | -1.186004 | -1.665480 |
| 6 | 1.590463  | -2.278739 | -2.953469 |
| 5 | -0.548688 | -0.687010 | -4.281142 |
| 5 | -2.075054 | -0.472697 | -3.545299 |
| 6 | -2.469193 | -1.801269 | -2.675239 |
| 6 | -1.235692 | -2.771503 | -2.668704 |
| 5 | 2.075054  | 0.472697  | 3.545299  |
| 5 | -3.589870 | 1.186004  | 1.665480  |
| 5 | -1.937299 | 3.241033  | 1.666859  |
| 5 | -3.341590 | 2.678292  | 0.879556  |
| 6 | -1.590463 | 2.278739  | 2.953469  |
| 6 | -1.590463 | 2.278739  | -2.953469 |
| 5 | -1.937299 | 3.241033  | -1.666859 |
| 5 | -3.341590 | 2.678292  | -0.879556 |
| 5 | -3.589870 | 1.186004  | -1.665480 |
| 7 | -0.377448 | -2.837338 | 0.000000  |
| 7 | 0.377448  | 2.837338  | 0.000000  |
| 7 | -2.001082 | 1.611532  | -1.493833 |
| 7 | -2.001082 | 1.611532  | 1.493833  |
| 7 | 0.929274  | 1.197665  | 2.557772  |
| 7 | 2.760733  | 1.128543  | 0.000000  |
| 7 | 0.929274  | 1.197665  | -2.557772 |
| 7 | 2.001082  | -1.611532 | -1.493833 |
| 7 | -0.929274 | -1.197665 | -2.557772 |
| 7 | -2.760733 | -1.128543 | 0.000000  |
| 7 | -0.929274 | -1.197665 | 2.557772  |
| 7 | 2.001082  | -1.611532 | 1.493833  |



| Atomic<br>Number | Coordinates (Angstroms) |           |           |
|------------------|-------------------------|-----------|-----------|
|                  | X                       | Y         | Z         |
| 5                | 1.556062                | 0.339746  | -0.085450 |
| 5                | 0.983229                | -0.938543 | 0.834545  |
| 5                | -1.549759               | -0.339769 | 0.107631  |
| 5                | -0.974212               | 0.923881  | -0.807632 |
| 5                | -0.528433               | -0.525053 | 1.412532  |
| 5                | 0.672950                | 0.643633  | 1.296936  |
| 5                | 0.528457                | 0.514362  | -1.382070 |
| 5                | -0.661705               | -0.628327 | -1.270390 |
| 5                | -0.892384               | 1.011830  | 0.848056  |
| 5                | 0.893767                | -0.993976 | -0.822663 |
| 5                | -1.360196               | -3.763066 | 1.624557  |
| 5                | -0.113038               | 2.015456  | -3.648374 |
| 5                | 3.942414                | -0.402150 | -1.167337 |
| 5                | -3.600821               | -1.194130 | 1.783814  |
| 5                | 1.322157                | 2.586971  | -2.916086 |
| 5                | 2.379836                | 3.498675  | -0.326677 |
| 5                | 0.096440                | -2.028507 | 3.668732  |
| 5                | -1.382515               | -2.673945 | 3.044951  |
| 5                | -2.192771               | 1.451846  | 3.170446  |
| 5                | -3.549743               | 1.560547  | -1.402712 |
| 5                | 1.533467                | 3.876320  | 1.119656  |
| 5                | -1.609693               | 3.425633  | -1.628754 |
| 5                | 1.285846                | -3.530084 | -1.680874 |
| 5                | 2.940329                | -2.912445 | 0.663645  |
| 5                | 1.713139                | -3.525611 | 1.685693  |
| 5                | -2.386001               | -3.514141 | 0.269267  |
| 5                | -1.386480               | 3.646055  | 1.738091  |
| 5                | 2.428756                | 0.273594  | 3.314769  |
| 5                | -3.075874               | -1.559507 | -2.359407 |
| 7                | -1.309096               | -1.161000 | -2.369972 |
| 7                | 1.598957                | -1.870420 | -1.627798 |
| 7                | -0.722726               | -2.820494 | 0.165620  |
| 7                | -2.896493               | -0.640213 | 0.242852  |
| 7                | -1.850774               | 1.762045  | -1.472511 |
| 7                | 0.731436                | 2.821767  | -0.154880 |
| 7                | -1.608713               | 1.913502  | 1.619267  |
| 7                | 1.338033                | 1.211345  | 2.369857  |
| 7                | 1.865886                | -1.801895 | 1.466406  |
| 7                | 2.896523                | 0.643672  | -0.271055 |
| 7                | 0.893649                | 0.977595  | -2.633831 |
| 7                | -0.920687               | -1.033961 | 2.638840  |
| 6                | -3.185077               | 1.697404  | 1.896294  |
| 6                | 2.422471                | 1.373038  | -2.989241 |
| 6                | 3.171531                | -1.738969 | -1.874711 |
| 6                | -1.420204               | -3.631240 | -1.047921 |
| 6                | -2.679922               | 1.315035  | -2.770812 |
| 6                | 1.251644                | 3.518727  | -1.521055 |
| 6                | 0.380419                | 1.497963  | -0.090260 |

|   |           |           |           |
|---|-----------|-----------|-----------|
| 6 | -0.378328 | -1.497358 | 0.078412  |
| 5 | -2.911371 | 2.942726  | -0.608620 |
| 6 | -1.581620 | 2.395731  | -2.902962 |
| 6 | -2.700906 | 2.918710  | 1.076316  |
| 5 | -0.969022 | 2.652925  | 3.097121  |
| 5 | -0.085177 | 4.206332  | 0.650437  |
| 6 | -0.144081 | 3.919413  | -0.963854 |
| 6 | 2.673888  | -1.310980 | 2.771836  |
| 5 | 0.954634  | -2.626154 | -3.096739 |
| 6 | 0.044058  | -3.979741 | -0.646117 |
| 5 | 0.191197  | -4.129356 | 0.985435  |
| 5 | -2.439162 | -0.281133 | -3.311626 |
| 5 | -1.846097 | -2.767515 | -2.430118 |
| 6 | -0.652461 | -2.189304 | -3.386493 |
| 6 | -0.977453 | -0.761306 | -3.883673 |
| 6 | -3.833504 | -1.217465 | -0.881207 |
| 5 | -3.937080 | 0.372154  | 1.178372  |
| 5 | 0.234885  | 0.407729  | -4.102477 |
| 6 | 1.789370  | 0.122409  | -3.650642 |
| 6 | -1.777867 | -0.112884 | 3.652315  |
| 6 | 2.662924  | -2.932371 | -1.026835 |
| 5 | 2.198441  | -1.460735 | -3.168891 |
| 5 | 3.566223  | -1.523923 | 1.419311  |
| 6 | 1.598603  | -2.428059 | 2.913340  |
| 6 | -2.420772 | -1.383568 | 3.026940  |
| 5 | -0.231518 | -0.406125 | 4.091926  |
| 5 | -3.621459 | -2.230940 | 0.398158  |
| 6 | -4.043320 | 0.257281  | -0.447600 |
| 6 | 0.972605  | 0.760919  | 3.875368  |
| 6 | 0.667990  | 2.210912  | 3.407324  |
| 5 | 3.064669  | 1.570056  | 2.398695  |
| 5 | 1.921828  | 2.859898  | 2.540780  |
| 5 | 3.611086  | 1.147613  | -1.779946 |
| 5 | 3.611964  | 2.221214  | -0.444124 |
| 6 | 4.042816  | -0.224942 | 0.454782  |
| 6 | 3.825816  | 1.256662  | 0.876705  |

CBN clusters from pentagonal pyramid isomer II

2a

| Atomic<br>Number | Coordinates (Angstroms) |           |           |
|------------------|-------------------------|-----------|-----------|
|                  | X                       | Y         | Z         |
| 5                | -0.086238               | 1.330947  | 0.830659  |
| 5                | 1.382998                | 0.646771  | 0.469210  |
| 5                | 0.086238                | -1.330947 | -0.830659 |
| 5                | -1.382998               | -0.646771 | -0.469210 |
| 5                | 1.145348                | -0.994895 | 0.412840  |
| 5                | -1.145348               | 0.994895  | -0.412840 |
| 5                | -0.458629               | -1.329648 | 0.751421  |

|   |           |           |           |
|---|-----------|-----------|-----------|
| 5 | 1.225006  | -0.119920 | -1.011991 |
| 5 | -1.225006 | 0.119920  | 1.011991  |
| 5 | 0.458629  | 1.329648  | -0.751421 |
| 5 | 3.646280  | -1.300658 | -1.663960 |
| 5 | 0.314263  | 4.063028  | 1.022707  |
| 5 | -2.420894 | 3.420152  | -0.072552 |
| 5 | 2.420894  | -3.420152 | 0.072552  |
| 5 | -3.646280 | 1.300658  | 1.663960  |
| 5 | -2.318505 | -3.341425 | 1.102015  |
| 5 | -0.314263 | -4.063028 | -1.022707 |
| 5 | -4.057812 | -1.157757 | 0.022439  |
| 5 | 4.057812  | 1.157757  | -0.022439 |
| 5 | 0.270375  | -1.538663 | 3.958828  |
| 5 | -0.512393 | -0.056676 | 4.225027  |
| 5 | -0.270375 | 1.538663  | -3.958828 |
| 5 | 2.318505  | 3.341425  | -1.102015 |
| 5 | 0.512393  | 0.056676  | -4.225027 |
| 6 | -0.330074 | 0.097474  | -1.509667 |
| 6 | 0.330074  | -0.097474 | 1.509667  |
| 6 | 1.766955  | -1.142588 | 3.503503  |
| 6 | -1.766955 | 1.142588  | -3.503503 |
| 7 | 2.281783  | -0.240784 | -1.893449 |
| 7 | 0.171943  | -2.502942 | -1.553889 |
| 7 | -2.576381 | -1.202019 | -0.896080 |
| 7 | -2.144865 | 1.876890  | -0.768311 |
| 7 | 0.844281  | 2.486659  | -1.400904 |
| 7 | -0.171943 | 2.502942  | 1.553889  |
| 7 | 2.576381  | 1.202019  | 0.896080  |
| 7 | 2.144865  | -1.876890 | 0.768311  |
| 7 | -0.844281 | -2.486659 | 1.400904  |
| 7 | -2.281783 | 0.240784  | 1.893449  |
| 7 | 0.601005  | -0.195902 | 2.858026  |
| 7 | -0.601005 | 0.195902  | -2.858026 |
| 5 | 2.050126  | 0.433082  | 3.618264  |
| 6 | 0.601706  | 1.064167  | 3.898594  |
| 6 | -0.601706 | -1.064167 | -3.898594 |
| 5 | -2.050126 | -0.433082 | -3.618264 |
| 6 | 1.801378  | -3.257090 | 1.586969  |
| 6 | 3.594885  | -1.338166 | 1.325735  |
| 5 | 2.563865  | -2.039305 | 2.384660  |
| 5 | 3.601060  | -2.162262 | -0.092653 |
| 5 | -0.564319 | -2.777114 | 3.078497  |
| 5 | -0.807980 | -4.076457 | 0.699728  |
| 6 | 0.210920  | -3.592908 | 1.886757  |
| 6 | -2.063595 | -2.493222 | 2.480842  |
| 6 | -2.835363 | -1.032250 | 2.743717  |
| 6 | -2.500086 | 1.541174  | 2.806772  |
| 5 | -2.116493 | 0.163040  | 3.605878  |
| 5 | -3.863430 | -0.412943 | 1.627223  |
| 5 | 0.175793  | 2.483780  | 3.195619  |
| 5 | -1.353191 | 3.727969  | 1.353763  |
| 6 | 1.178078  | 3.236013  | 2.145085  |

|   |           |           |           |
|---|-----------|-----------|-----------|
| 6 | -1.358555 | 2.729607  | 2.661260  |
| 6 | 3.834257  | 0.296686  | 1.350995  |
| 6 | 2.637036  | 2.563807  | 1.757903  |
| 5 | 3.120633  | 1.197548  | 2.507111  |
| 5 | 3.261511  | 2.666046  | 0.248532  |
| 5 | -3.261511 | -2.666046 | -0.248532 |
| 5 | -3.120633 | -1.197548 | -2.507111 |
| 6 | -2.637036 | -2.563807 | -1.757903 |
| 6 | -3.834257 | -0.296686 | -1.350995 |
| 6 | -1.178078 | -3.236013 | -2.145085 |
| 6 | 1.358555  | -2.729607 | -2.661260 |
| 5 | 1.353191  | -3.727969 | -1.353763 |
| 5 | -0.175793 | -2.483780 | -3.195619 |
| 5 | 3.863430  | 0.412943  | -1.627223 |
| 5 | 2.116493  | -0.163040 | -3.605878 |
| 6 | 2.835363  | 1.032250  | -2.743717 |
| 6 | 2.500086  | -1.541174 | -2.806772 |
| 6 | -0.210920 | 3.592908  | -1.886757 |
| 6 | 2.063595  | 2.493222  | -2.480842 |
| 5 | 0.807980  | 4.076457  | -0.699728 |
| 5 | 0.564319  | 2.777114  | -3.078497 |
| 5 | -3.601060 | 2.162262  | 0.092653  |
| 5 | -2.563865 | 2.039305  | -2.384660 |
| 6 | -3.594885 | 1.338166  | -1.325735 |
| 6 | -1.801378 | 3.257090  | -1.586969 |

2b

| Atomic<br>Number | Coordinates (Angstroms) |           |           |
|------------------|-------------------------|-----------|-----------|
|                  | X                       | Y         | Z         |
| 5                | -0.088202               | 1.329842  | 0.827004  |
| 5                | 1.380621                | 0.651413  | 0.465207  |
| 5                | 0.088202                | -1.329842 | -0.827004 |
| 5                | -1.380621               | -0.651413 | -0.465207 |
| 5                | 1.145506                | -0.990511 | 0.408316  |
| 5                | -1.145506               | 0.990511  | -0.408316 |
| 5                | -0.454985               | -1.330900 | 0.751379  |
| 5                | 1.225274                | -0.115504 | -1.011898 |
| 5                | -1.225274               | 0.115504  | 1.011898  |
| 5                | 0.454985                | 1.330900  | -0.751379 |
| 5                | -2.586933               | 1.611778  | 2.814019  |
| 5                | 1.827235                | -3.367369 | 1.554636  |
| 5                | -1.212592               | -3.346086 | -2.126264 |
| 5                | -3.934283               | -0.295082 | -1.314800 |
| 5                | 2.156726                | 2.555148  | -2.483889 |
| 5                | 3.934283                | 0.295082  | 1.314800  |
| 5                | 0.300199                | -1.570653 | 3.923158  |
| 5                | 2.586933                | -1.611778 | -2.814019 |
| 5                | -0.542066               | -0.095007 | 4.196061  |
| 5                | -2.156726               | -2.555148 | 2.483889  |

|   |           |           |           |
|---|-----------|-----------|-----------|
| 5 | -0.300199 | 1.570653  | -3.923158 |
| 5 | 1.212592  | 3.346086  | 2.126264  |
| 5 | 0.542066  | 0.095007  | -4.196061 |
| 6 | -0.331110 | 0.096263  | -1.509714 |
| 6 | 0.331110  | -0.096263 | 1.509714  |
| 6 | 1.803920  | -1.122378 | 3.481755  |
| 6 | -1.803920 | 1.122378  | -3.481755 |
| 7 | 2.272922  | -0.253649 | -1.909632 |
| 7 | 0.152581  | -2.496497 | -1.565434 |
| 7 | -2.578991 | -1.191410 | -0.913159 |
| 7 | -2.131894 | 1.881189  | -0.785177 |
| 7 | 0.840681  | 2.481024  | -1.423510 |
| 7 | -0.152581 | 2.496497  | 1.565434  |
| 7 | 2.578991  | 1.191410  | 0.913159  |
| 7 | 2.131894  | -1.881189 | 0.785177  |
| 7 | -0.840681 | -2.481024 | 1.423510  |
| 7 | -2.272922 | 0.253649  | 1.909632  |
| 7 | 0.603237  | -0.193031 | 2.846406  |
| 7 | -0.603237 | 0.193031  | -2.846406 |
| 5 | 2.038917  | 0.484330  | 3.601110  |
| 6 | 0.555808  | 1.076292  | 3.892936  |
| 6 | -0.555808 | -1.076292 | -3.892936 |
| 5 | -2.038917 | -0.484330 | -3.601110 |
| 6 | -2.244552 | -3.265868 | 1.024268  |
| 6 | 0.179650  | -3.680091 | 1.861231  |
| 5 | -0.825222 | -3.951659 | 0.627953  |
| 5 | -0.558293 | -2.882478 | 3.083010  |
| 5 | -3.769123 | -0.367379 | 1.520726  |
| 5 | -2.207396 | 0.129760  | 3.629392  |
| 6 | -3.566894 | 1.248803  | 1.579022  |
| 6 | -2.927494 | -1.032355 | 2.734723  |
| 6 | -1.383859 | 2.813094  | 2.645750  |
| 6 | 0.272970  | 3.965291  | 0.958936  |
| 5 | 0.125102  | 2.559917  | 3.223773  |
| 5 | -1.301777 | 3.643760  | 1.253004  |
| 5 | 3.171961  | 2.570190  | 0.175938  |
| 5 | 3.178590  | 1.281463  | 2.515328  |
| 6 | 2.702101  | 2.618349  | 1.721014  |
| 6 | 3.932201  | 1.152966  | -0.056641 |
| 6 | 3.649970  | -1.389204 | 1.282998  |
| 6 | 2.370453  | -3.320568 | 0.022946  |
| 5 | 2.653940  | -2.069362 | 2.375723  |
| 5 | 3.472911  | -2.125024 | -0.151303 |
| 5 | 0.825222  | 3.951659  | -0.627953 |
| 6 | 2.244552  | 3.265868  | -1.024268 |
| 6 | -0.179650 | 3.680091  | -1.861231 |
| 5 | 0.558293  | 2.882478  | -3.083010 |
| 5 | -3.472911 | 2.125024  | 0.151303  |
| 6 | -2.370453 | 3.320568  | -0.022946 |
| 6 | -3.649970 | 1.389204  | -1.282998 |
| 5 | -2.653940 | 2.069362  | -2.375723 |
| 5 | -1.827235 | 3.367369  | -1.554636 |

|   |           |           |           |
|---|-----------|-----------|-----------|
| 5 | -3.171961 | -2.570190 | -0.175938 |
| 5 | -3.178590 | -1.281463 | -2.515328 |
| 6 | -3.932201 | -1.152966 | 0.056641  |
| 6 | -2.702101 | -2.618349 | -1.721014 |
| 6 | -0.272970 | -3.965291 | -0.958936 |
| 6 | 1.383859  | -2.813094 | -2.645750 |
| 5 | 1.301777  | -3.643760 | -1.253004 |
| 5 | -0.125102 | -2.559917 | -3.223773 |
| 5 | 3.769123  | 0.367379  | -1.520726 |
| 6 | 3.566894  | -1.248803 | -1.579022 |
| 6 | 2.927494  | 1.032355  | -2.734723 |
| 5 | 2.207396  | -0.129760 | -3.629392 |

2d

| Atomic<br>Number | Coordinates (Angstroms) |           |           |
|------------------|-------------------------|-----------|-----------|
|                  | X                       | Y         | Z         |
| 5                | -0.090661               | 1.357934  | 0.816080  |
| 5                | 1.403487                | 0.657619  | 0.446872  |
| 5                | 0.090661                | -1.357934 | -0.816080 |
| 5                | -1.403487               | -0.657619 | -0.446872 |
| 5                | 1.158965                | -1.012795 | 0.391893  |
| 5                | -1.158965               | 1.012795  | -0.391893 |
| 5                | -0.475286               | -1.351120 | 0.740082  |
| 5                | 1.254961                | -0.127441 | -1.004866 |
| 5                | -1.254961               | 0.127441  | 1.004866  |
| 5                | 0.475286                | 1.351120  | -0.740082 |
| 5                | 3.656253                | -1.238334 | -1.567410 |
| 5                | 0.228313                | 4.044040  | 0.932046  |
| 5                | -1.890534               | 3.423192  | -1.607278 |
| 5                | -2.437344               | 3.354355  | 0.030214  |
| 5                | -2.643385               | 1.630119  | 2.902909  |
| 5                | 1.890534                | -3.423192 | 1.607278  |
| 5                | -1.219129               | -3.413143 | -2.196239 |
| 5                | 2.437344                | -3.354355 | -0.030214 |
| 5                | -3.656253               | 1.238334  | 1.567410  |
| 5                | -2.268875               | -3.344272 | 0.984713  |
| 5                | -4.018222               | -0.314576 | -1.370207 |
| 5                | -0.228313               | -4.044040 | -0.932046 |
| 5                | -3.985814               | -1.210272 | 0.100754  |
| 5                | 2.179803                | 2.618321  | -2.550686 |
| 5                | 3.985814                | 1.210272  | -0.100754 |
| 5                | 4.018222                | 0.314576  | 1.370207  |
| 5                | 0.212377                | -1.558056 | 3.746885  |
| 5                | 2.643385                | -1.630119 | -2.902909 |
| 5                | -0.592470               | -0.037749 | 4.018628  |
| 5                | -2.179803               | -2.618321 | 2.550686  |
| 5                | -0.212377               | 1.558056  | -3.746885 |
| 5                | 1.219129                | 3.413143  | 2.196239  |
| 5                | 2.268875                | 3.344272  | -0.984713 |

|   |           |           |           |
|---|-----------|-----------|-----------|
| 5 | 0.592470  | 0.037749  | -4.018628 |
| 6 | -0.312924 | 0.091482  | -1.426726 |
| 6 | 0.312924  | -0.091482 | 1.426726  |
| 6 | 1.765990  | -1.168078 | 3.339093  |
| 6 | -1.765990 | 1.168078  | -3.339093 |
| 6 | -3.209982 | -2.596476 | -0.214781 |
| 6 | 3.209982  | 2.596476  | 0.214781  |
| 6 | -3.520099 | 2.147420  | 0.127277  |
| 6 | 3.520099  | -2.147420 | -0.127277 |
| 6 | -0.821780 | -3.999270 | 0.664334  |
| 6 | 0.821780  | 3.999270  | -0.664334 |
| 6 | 1.313747  | -3.679583 | -1.293503 |
| 6 | -1.313747 | 3.679583  | 1.293503  |
| 6 | -3.803806 | -0.374404 | 1.567236  |
| 6 | 3.803806  | 0.374404  | -1.567236 |
| 7 | 2.295214  | -0.273619 | -1.915887 |
| 7 | 0.147551  | -2.520797 | -1.568044 |
| 7 | -2.604692 | -1.192664 | -0.902246 |
| 7 | -2.146123 | 1.900946  | -0.787170 |
| 7 | 0.853136  | 2.502711  | -1.421109 |
| 7 | -0.147551 | 2.520797  | 1.568044  |
| 7 | 2.604692  | 1.192664  | 0.902246  |
| 7 | 2.146123  | -1.900946 | 0.787170  |
| 7 | -0.853136 | -2.502711 | 1.421109  |
| 7 | -2.295214 | 0.273619  | 1.915887  |
| 7 | 0.582801  | -0.184692 | 2.743060  |
| 7 | -0.582801 | 0.184692  | -2.743060 |
| 5 | 2.033250  | 0.462564  | 3.408977  |
| 6 | 0.554396  | 1.121532  | 3.748651  |
| 6 | -0.554396 | -1.121532 | -3.748651 |
| 5 | -2.033250 | -0.462564 | -3.408977 |
| 5 | 3.719039  | -1.411017 | 1.307019  |
| 6 | 2.588713  | -2.100337 | 2.275589  |
| 6 | -2.588713 | 2.100337  | -2.275589 |
| 5 | -3.719039 | 1.411017  | -1.307019 |
| 5 | 2.742927  | 2.658984  | 1.769118  |
| 6 | 3.131369  | 1.207901  | 2.395212  |
| 6 | -3.131369 | -1.207901 | -2.395212 |
| 5 | -2.742927 | -2.658984 | -1.769118 |
| 5 | -1.412682 | 2.861326  | 2.695878  |
| 6 | 0.157873  | 2.571976  | 3.103404  |
| 6 | -0.157873 | -2.571976 | -3.103404 |
| 5 | 1.412682  | -2.861326 | -2.695878 |
| 5 | -2.967406 | -1.050056 | 2.795050  |
| 6 | -2.183254 | 0.193050  | 3.501539  |
| 6 | 2.183254  | -0.193050 | -3.501539 |
| 5 | 2.967406  | 1.050056  | -2.795050 |
| 5 | 0.192186  | -3.740199 | 1.908738  |
| 6 | -0.619819 | -2.807093 | 2.967530  |
| 6 | 0.619819  | 2.807093  | -2.967530 |
| 5 | -0.192186 | 3.740199  | -1.908738 |

2e

| Atomic<br>Number | Coordinates (Angstroms) |           |           |
|------------------|-------------------------|-----------|-----------|
|                  | X                       | Y         | Z         |
| 5                | 1.462364                | 0.157021  | -0.616620 |
| 5                | 1.143507                | 0.418790  | 0.998146  |
| 5                | -1.461606               | -0.141670 | 0.620867  |
| 5                | -1.153892               | -0.425123 | -1.002752 |
| 5                | -0.400703               | 1.032832  | 1.146947  |
| 5                | 0.559311                | 1.482564  | -0.147572 |
| 5                | 0.400418                | -1.013771 | -1.132149 |
| 5                | -0.554911               | -1.458285 | 0.156096  |
| 5                | -1.046434               | 1.112859  | -0.390333 |
| 5                | 1.060726                | -1.121168 | 0.386816  |
| 5                | -0.567621               | -0.139065 | 4.196930  |
| 5                | 4.013369                | -0.772587 | -0.822912 |
| 5                | -3.289432               | 0.852981  | 2.374850  |
| 5                | 0.913213                | -1.446712 | -3.747692 |
| 5                | 1.662725                | 1.317800  | -3.671002 |
| 5                | -1.796699               | 3.228197  | 1.908961  |
| 5                | 3.472633                | 1.855680  | -1.310567 |
| 5                | -0.966552               | 0.727266  | -3.986082 |
| 5                | 0.445990                | 2.514364  | 3.263236  |
| 5                | -4.113654               | -0.660820 | 0.261768  |
| 5                | -0.874129               | 1.577461  | 3.853511  |
| 5                | -2.548523               | 3.268645  | 0.288009  |
| 5                | -3.775583               | -1.066671 | -1.422096 |
| 5                | 0.737618                | 2.682317  | -3.191223 |
| 5                | -3.302062               | 1.698760  | -1.822171 |
| 5                | -1.866537               | -1.978979 | -3.124071 |
| 5                | -2.289408               | -0.365679 | -3.560558 |
| 5                | 2.065859                | -2.945157 | 2.256881  |
| 5                | 3.391979                | -0.385141 | 2.343149  |
| 5                | 2.218293                | 0.210457  | 3.471408  |
| 5                | 2.914524                | 2.272438  | 1.893162  |
| 5                | -1.660597               | -1.347531 | 3.652157  |
| 5                | 1.223275                | 3.657753  | -1.788531 |
| 5                | -2.017972               | 2.764181  | -2.296903 |
| 5                | 2.239552                | 3.428003  | 0.711937  |
| 5                | -0.789969               | -3.996471 | -0.807444 |
| 5                | 3.128979                | 0.925447  | -2.740464 |
| 5                | -2.674334               | -3.016634 | 0.940565  |
| 5                | 0.859650                | -2.292068 | 3.369965  |
| 7                | -1.067993               | -2.732823 | 0.307176  |
| 7                | 1.947041                | -2.126550 | 0.750030  |
| 7                | -0.192509               | -1.041838 | 2.719455  |
| 7                | -2.729623               | -0.270852 | 1.162734  |
| 7                | -2.127868               | -0.819161 | -1.911883 |
| 7                | 0.201931                | 1.076618  | -2.704088 |
| 7                | -1.969521               | 2.069034  | -0.762225 |
| 7                | 1.016321                | 2.781813  | -0.306650 |



|   |           |           |           |
|---|-----------|-----------|-----------|
| 7 | 2.154292  | 0.743364  | 1.881270  |
| 7 | 2.721158  | 0.334201  | -1.169965 |
| 7 | 0.755998  | -1.897907 | -2.132200 |
| 7 | -0.708310 | 1.914214  | 2.170294  |
| 6 | -0.178584 | 3.452823  | 2.085205  |
| 6 | -2.144652 | 2.008757  | 2.906818  |
| 6 | -1.626161 | 3.652182  | -0.981679 |
| 6 | -3.485730 | 2.009643  | -0.228602 |
| 6 | 0.916430  | -0.759369 | 3.904561  |
| 6 | -0.718704 | -2.557374 | 3.096498  |
| 6 | -3.351483 | 0.111853  | -2.426254 |
| 6 | -2.769809 | -2.308612 | -1.802452 |
| 6 | 0.558975  | 0.171469  | -4.034841 |
| 6 | -0.819862 | 2.203905  | -3.331479 |
| 6 | 2.493409  | 3.185746  | -0.862823 |
| 6 | 1.987661  | 1.792558  | 3.125051  |
| 6 | 3.674237  | 0.904385  | 1.376181  |
| 6 | 0.667680  | 3.898946  | 0.809877  |
| 5 | -0.006961 | 4.091403  | -0.661876 |
| 6 | 3.959367  | 0.743009  | -0.201482 |
| 6 | 3.386775  | -0.622630 | -2.291192 |
| 6 | -2.259035 | -3.271255 | -0.623749 |
| 6 | -3.854699 | 0.858664  | 0.837651  |
| 6 | 0.093076  | 0.565953  | -1.439332 |
| 6 | -0.092998 | -0.560175 | 1.442565  |
| 6 | -0.252509 | -2.490100 | -3.266397 |
| 6 | 1.842302  | -3.054449 | -1.870458 |
| 5 | 2.347170  | -1.847279 | -2.854137 |
| 5 | 0.289809  | -3.535143 | -2.162869 |
| 5 | -3.114550 | -0.832059 | 2.768712  |
| 6 | -3.543350 | -1.629148 | 1.411296  |
| 6 | -0.183010 | -4.048342 | 0.685548  |
| 5 | -1.242214 | -3.491517 | 1.799627  |
| 5 | 1.481590  | -3.767222 | 0.857493  |
| 5 | 3.556633  | -2.173049 | 0.147359  |
| 6 | 2.402667  | -3.220640 | -0.372697 |
| 6 | 3.234564  | -1.954112 | 1.707137  |

2f

| Atomic<br>Number | Coordinates (Angstroms) |           |           |
|------------------|-------------------------|-----------|-----------|
|                  | X                       | Y         | Z         |
| 5                | 1.006921                | -0.000652 | 1.193901  |
| 5                | 0.891070                | -1.300251 | 0.171877  |
| 5                | -1.035508               | 0.011386  | -1.195206 |
| 5                | -0.900255               | 1.330110  | -0.167616 |
| 5                | -0.706356               | -1.383122 | -0.329084 |
| 5                | -0.359870               | -0.938160 | 1.231630  |
| 5                | 0.701763                | 1.392997  | 0.350458  |
| 5                | 0.352901                | 0.927845  | -1.191931 |
| 5                | -1.533331               | -0.122431 | 0.375497  |

|   |           |           |           |
|---|-----------|-----------|-----------|
| 5 | 1.575854  | 0.141230  | -0.365676 |
| 5 | 0.268019  | -2.879086 | -3.058007 |
| 5 | 0.555326  | 4.192730  | 0.527173  |
| 5 | 3.554383  | 0.112648  | 1.923399  |
| 5 | 2.951907  | 2.936224  | 0.366173  |
| 5 | -2.730291 | -1.478248 | -2.642538 |
| 5 | 0.911285  | 3.459415  | 2.058020  |
| 5 | 0.069637  | 1.519921  | 3.939015  |
| 5 | -2.916416 | -2.966519 | -0.255151 |
| 5 | 1.711008  | -0.998821 | 3.618761  |
| 5 | -1.855365 | 2.792976  | 2.482263  |
| 5 | -0.459469 | -4.099919 | -0.417114 |
| 5 | -3.078261 | 1.223604  | -2.657985 |
| 5 | -0.940137 | -3.635194 | -1.998696 |
| 5 | -3.821411 | -1.601029 | 0.435352  |
| 5 | -2.830340 | 2.624418  | -1.629285 |
| 5 | -1.343513 | 0.553274  | 3.968246  |
| 5 | -3.953460 | 1.124187  | 0.485269  |
| 5 | -1.107750 | 4.114974  | -0.114553 |
| 5 | -2.336140 | 3.467318  | 0.900207  |
| 5 | 3.684109  | -0.408212 | -2.134922 |
| 5 | 3.446088  | -2.520600 | -0.015252 |
| 5 | 2.270539  | -3.319106 | -0.996617 |
| 5 | 3.846364  | 1.658658  | -0.425627 |
| 5 | -1.822557 | 0.842340  | -3.738108 |
| 5 | 1.467047  | -3.560564 | 1.561064  |
| 5 | -0.138366 | -1.401983 | -3.827415 |
| 5 | -1.225579 | -1.207845 | 3.876477  |
| 5 | -3.532039 | 0.519673  | 2.058717  |
| 5 | 0.125166  | -3.196212 | 2.651649  |
| 5 | 2.286029  | 1.991729  | -2.789878 |
| 5 | 1.404299  | 3.274225  | -2.049217 |
| 5 | 4.146860  | -1.018665 | -0.602346 |
| 5 | 1.666576  | 0.737448  | 3.803567  |
| 5 | -0.328855 | 1.859075  | -3.684775 |
| 5 | 2.463901  | -1.272496 | -3.071154 |
| 7 | 0.677330  | 1.731130  | -2.261000 |
| 7 | 2.924518  | 0.209814  | -0.738988 |
| 7 | 0.812188  | -1.316096 | -2.416543 |
| 7 | -1.919617 | 0.024372  | -2.269566 |
| 7 | -1.661846 | 2.483241  | -0.319435 |
| 7 | -0.852029 | 1.306103  | 2.467325  |
| 7 | -2.871766 | -0.217720 | 0.699063  |
| 7 | -0.695473 | -1.731736 | 2.316853  |
| 7 | 1.686911  | -2.429003 | 0.291615  |
| 7 | 1.859883  | -0.005961 | 2.273945  |
| 7 | 1.278768  | 2.609799  | 0.670262  |
| 7 | -1.262770 | -2.616819 | -0.645470 |
| 6 | -1.669946 | -3.635643 | 0.568363  |
| 6 | -2.371236 | -2.874744 | -1.774404 |
| 6 | -3.465311 | -1.108238 | 1.933098  |
| 6 | -4.007807 | -0.224105 | -0.441450 |

|   |           |           |           |
|---|-----------|-----------|-----------|
| 6 | 2.361903  | 2.696378  | 1.875040  |
| 6 | 1.762423  | 3.703153  | -0.430409 |
| 6 | 4.107934  | 0.275020  | 0.364114  |
| 6 | 3.473708  | 1.187459  | -1.924030 |
| 6 | 1.788467  | -2.652718 | -2.510333 |
| 6 | 1.200086  | -0.463878 | -3.752751 |
| 6 | -3.262641 | 2.555780  | -0.080084 |
| 6 | -1.408670 | 3.448498  | -1.587319 |
| 6 | -0.299103 | 2.774987  | 2.969915  |
| 6 | -2.402248 | 1.346491  | 2.998051  |
| 6 | 0.238189  | -1.923684 | 3.643168  |
| 6 | 1.157765  | -3.951289 | 0.023662  |
| 6 | 2.756357  | -2.561960 | 1.465697  |
| 6 | -1.413874 | -3.165659 | 2.076628  |
| 5 | -2.305734 | -2.013289 | 2.795615  |
| 6 | 2.872455  | -1.288311 | 2.480263  |
| 6 | 2.722138  | 1.296930  | 2.669251  |
| 6 | 1.159583  | 1.154433  | -3.649905 |
| 6 | -0.156205 | 3.078296  | -2.575826 |
| 6 | -1.665911 | -0.778306 | -3.652689 |
| 6 | -3.511336 | -0.206995 | -1.978299 |
| 6 | -0.472040 | 0.717970  | 1.294584  |
| 6 | 0.453166  | -0.693180 | -1.263891 |

CBN clusters from pentagonal pyramid isomer III

3a

| Atomic<br>Number | Coordinates (Angstroms) |           |           |
|------------------|-------------------------|-----------|-----------|
|                  | X                       | Y         | Z         |
| 5                | -0.285687               | 1.294461  | 0.970732  |
| 5                | 1.305406                | 0.978346  | 0.270024  |
| 5                | 0.285687                | -1.294461 | -0.970732 |
| 5                | -1.305406               | -0.978346 | -0.270024 |
| 5                | 1.467127                | -0.740987 | 0.175849  |
| 5                | -1.467127               | 0.740987  | -0.175849 |
| 5                | -0.059788               | -1.341172 | 0.820866  |
| 5                | 1.267655                | 0.129618  | -1.254239 |
| 5                | -1.267655               | -0.129618 | 1.254239  |
| 5                | 0.059788                | 1.341172  | -0.820866 |
| 5                | 2.829244                | -1.196828 | -2.479674 |
| 5                | 0.434823                | 4.050378  | 1.090737  |
| 5                | -2.586622               | 3.291694  | -0.060189 |
| 5                | -2.829244               | 1.196828  | 2.479674  |
| 5                | -1.891251               | -2.973710 | 2.060029  |
| 5                | -0.434823               | -4.050378 | -1.090737 |
| 5                | -3.729207               | -1.541539 | 0.200706  |
| 5                | 3.729207                | 1.541539  | -0.200706 |
| 5                | 1.216320                | 1.238293  | 4.194943  |
| 5                | -1.216320               | -1.238293 | -4.194943 |

|   |           |           |           |
|---|-----------|-----------|-----------|
| 6 | -0.709224 | -0.015557 | -1.502863 |
| 6 | 0.709224  | 0.015557  | 1.502863  |
| 7 | 0.255473  | 0.052831  | 4.614862  |
| 7 | -0.255473 | -0.052831 | -4.614862 |
| 5 | 2.586622  | -3.291694 | 0.060189  |
| 6 | 3.120973  | -1.640637 | 2.348197  |
| 6 | -3.120973 | 1.640637  | -2.348197 |
| 6 | 3.238606  | 1.477111  | 2.400058  |
| 6 | -3.238606 | -1.477111 | -2.400058 |
| 6 | 0.629260  | 2.514943  | 3.537062  |
| 6 | -0.629260 | -2.514943 | -3.537062 |
| 6 | -1.019132 | 0.197589  | 4.225642  |
| 6 | 1.019132  | -0.197589 | -4.225642 |
| 6 | 0.383157  | -2.227151 | 3.391080  |
| 6 | -0.383157 | 2.227151  | -3.391080 |
| 5 | 2.724292  | 0.800409  | 3.725418  |
| 5 | 2.637878  | -0.829713 | 3.594188  |
| 6 | 1.069744  | -1.064844 | 3.919281  |
| 6 | -1.069744 | 1.064844  | -3.919281 |
| 5 | -2.724292 | -0.800409 | -3.725418 |
| 5 | -2.637878 | 0.829713  | -3.594188 |
| 5 | 2.307202  | -2.814085 | 1.698335  |
| 5 | 3.202917  | -2.195691 | -1.095374 |
| 7 | 3.681508  | -0.927218 | 1.289263  |
| 7 | 0.894425  | -2.961388 | 2.341277  |
| 5 | -1.159974 | -2.219759 | 3.349588  |
| 5 | -1.298012 | -3.470202 | 0.380270  |
| 5 | -1.635334 | 1.562556  | 3.604491  |
| 5 | -3.101276 | -1.491657 | 1.677736  |
| 7 | -1.696358 | -0.846391 | 3.644976  |
| 7 | -0.678871 | 2.524855  | 3.168147  |
| 5 | -1.192056 | 3.780423  | 0.781869  |
| 5 | 1.309451  | 3.241777  | 2.354427  |
| 5 | 2.966674  | 2.924710  | -0.819726 |
| 5 | 3.870820  | 0.580109  | 1.195166  |
| 7 | 2.526580  | 2.481125  | 1.858837  |
| 5 | -2.307202 | 2.814085  | -1.698335 |
| 7 | -3.681508 | 0.927218  | -1.289263 |
| 5 | -3.202917 | 2.195691  | 1.095374  |
| 7 | 1.696358  | 0.846391  | -3.644976 |
| 5 | 1.635334  | -1.562556 | -3.604491 |
| 5 | 3.101276  | 1.491657  | -1.677736 |
| 5 | 1.298012  | 3.470202  | -0.380270 |
| 5 | 1.891251  | 2.973710  | -2.060029 |
| 5 | 1.159974  | 2.219759  | -3.349588 |
| 7 | -0.894425 | 2.961388  | -2.341277 |
| 7 | -2.526580 | -2.481125 | -1.858837 |
| 5 | -3.870820 | -0.580109 | -1.195166 |
| 5 | -2.966674 | -2.924710 | 0.819726  |
| 5 | -1.309451 | -3.241777 | -2.354427 |
| 5 | 1.192056  | -3.780423 | -0.781869 |
| 7 | 0.678871  | -2.524855 | -3.168147 |

|   |           |           |           |
|---|-----------|-----------|-----------|
| 6 | 1.420906  | 0.003725  | 2.820570  |
| 6 | -2.500680 | -0.348545 | 2.479681  |
| 6 | -0.457674 | 2.652365  | 1.680757  |
| 6 | 2.293409  | 2.190588  | 0.449787  |
| 6 | 2.776209  | -1.494474 | 0.233821  |
| 6 | -0.312632 | -2.696202 | 1.460388  |
| 6 | -2.293409 | -2.190588 | -0.449787 |
| 6 | 0.457674  | -2.652365 | -1.680757 |
| 6 | 2.500680  | 0.348545  | -2.479681 |
| 6 | 0.312632  | 2.696202  | -1.460388 |
| 6 | -2.776209 | 1.494474  | -0.233821 |
| 6 | -1.420906 | -0.003725 | -2.820570 |

3b

| Atomic<br>Number | Coordinates (Angstroms) |           |           |
|------------------|-------------------------|-----------|-----------|
|                  | X                       | Y         | Z         |
| 5                | 1.372702                | -0.480470 | 0.776529  |
| 5                | -0.161285               | -1.165136 | 1.283885  |
| 5                | -1.372763               | 0.480458  | -0.776439 |
| 5                | 0.161207                | 1.165152  | -1.283690 |
| 5                | -1.358816               | 0.043454  | 0.901116  |
| 5                | 1.358703                | -0.043477 | -0.901011 |
| 5                | -0.633075               | 1.525221  | 0.363548  |
| 5                | -1.103556               | -1.177884 | -0.239686 |
| 5                | 1.103532                | 1.177880  | 0.239776  |
| 5                | 0.633021                | -1.525262 | -0.363412 |
| 5                | 2.651690                | 0.141495  | 3.381614  |
| 5                | -2.651711               | -0.141511 | -3.381601 |
| 6                | -0.182003               | -0.503996 | -1.494335 |
| 6                | 0.181971                | 0.503982  | 1.494413  |
| 5                | -1.216198               | 2.997465  | 0.965508  |
| 5                | -2.900168               | -0.234790 | 1.501149  |
| 5                | -0.488225               | -3.684830 | 1.834467  |
| 5                | 2.258151                | 2.274356  | 0.667206  |
| 5                | 2.860225                | -0.847320 | 1.353287  |
| 5                | 2.899830                | 0.234788  | -1.501274 |
| 5                | 0.488556                | 3.684724  | -1.834406 |
| 5                | -2.860249               | 0.847258  | -1.353328 |
| 5                | -2.258249               | -2.274276 | -0.667110 |
| 5                | 1.216355                | -2.997446 | -0.965423 |
| 5                | -0.457962               | -1.211922 | -2.938833 |
| 5                | 0.457940                | 1.211921  | 2.938856  |
| 7                | 1.934215                | 1.313184  | 3.305041  |
| 7                | -1.934239               | -1.313206 | -3.305002 |
| 5                | -0.838592               | -1.019344 | 3.679611  |
| 5                | -1.492050               | 0.476197  | 3.920773  |
| 6                | -0.854894               | 1.780845  | 3.523440  |
| 6                | 0.854769                | -1.781121 | -3.523421 |
| 5                | 0.838919                | 1.019001  | -3.679528 |
| 5                | 1.491881                | -0.476534 | -3.920839 |

|   |           |           |           |
|---|-----------|-----------|-----------|
| 5 | -3.651530 | 1.240330  | 2.037814  |
| 5 | 0.149353  | 4.072549  | 1.271572  |
| 5 | 3.888222  | 1.721123  | 1.434634  |
| 5 | 3.158506  | -2.585342 | 2.157313  |
| 5 | -2.142769 | -2.856759 | 2.182823  |
| 5 | 3.651299  | -1.240202 | -2.037902 |
| 5 | -3.888234 | -1.721142 | -1.434684 |
| 5 | -0.149118 | -4.072360 | -1.271766 |
| 5 | 2.142963  | 2.857274  | -2.182872 |
| 5 | -3.158571 | 2.585290  | -2.157363 |
| 5 | 2.597635  | 2.370063  | 2.373974  |
| 5 | -0.571721 | -2.213801 | 2.699034  |
| 5 | 3.560646  | -1.071519 | 2.867598  |
| 5 | -2.969289 | -0.108730 | 3.201210  |
| 5 | -1.460757 | 2.793441  | 2.614734  |
| 5 | 1.460535  | -2.793663 | -2.614675 |
| 5 | -2.597651 | -2.370087 | -2.373969 |
| 5 | -3.560688 | 1.071489  | -2.867636 |
| 5 | 0.572020  | 2.213434  | -2.698804 |
| 5 | 2.968950  | 0.109122  | -3.201339 |
| 6 | 2.078603  | 3.796012  | 0.157180  |
| 7 | 3.829183  | 2.192681  | 0.066717  |
| 5 | 1.807149  | 3.787528  | 1.594107  |
| 5 | 4.377385  | -0.010410 | 1.743761  |
| 7 | 3.557924  | -2.896990 | 0.763488  |
| 6 | 4.223213  | -0.529593 | 0.403197  |
| 6 | 0.792809  | -4.185413 | 1.192467  |
| 7 | -1.846576 | -3.830986 | 1.185263  |
| 5 | 1.882212  | -3.617274 | 1.943541  |
| 5 | -3.351216 | -1.667863 | 2.524723  |
| 7 | -4.152252 | 0.553068  | 0.904285  |
| 6 | -3.848840 | -1.832339 | 1.169218  |
| 6 | -3.367163 | 3.152142  | 0.426429  |
| 7 | -0.762979 | 4.250008  | 0.248272  |
| 5 | -2.990576 | 2.817572  | 1.794739  |
| 5 | 2.990478  | -2.817446 | -1.794747 |
| 6 | 3.367199  | -3.152023 | -0.426467 |
| 7 | 0.763145  | -4.250163 | -0.248449 |
| 7 | -3.828870 | -2.192792 | -0.066746 |
| 6 | -2.078491 | -3.796091 | -0.157051 |
| 5 | -1.807062 | -3.787400 | -1.593948 |
| 5 | -4.377435 | 0.010325  | -1.743838 |
| 7 | -3.557895 | 2.897083  | -0.763523 |
| 6 | -4.223397 | 0.529660  | -0.403307 |
| 6 | -0.792702 | 4.185155  | -1.192667 |
| 7 | 1.846698  | 3.831253  | -1.185165 |
| 5 | -1.882288 | 3.617184  | -1.943610 |
| 5 | 3.350939  | 1.668135  | -2.524691 |
| 6 | 3.849140  | 1.832363  | -1.169201 |
| 7 | 4.152032  | -0.552804 | -0.904434 |

3c

| Atomic<br>Number | Coordinates (Angstroms) |           |           |
|------------------|-------------------------|-----------|-----------|
|                  | X                       | Y         | Z         |
| 5                | -0.571110               | 1.499474  | 0.484111  |
| 5                | -1.597109               | 0.115223  | 0.434522  |
| 5                | 0.550837                | -1.498951 | -0.461794 |
| 5                | 1.586102                | -0.113312 | -0.422814 |
| 5                | -0.982778               | -0.899256 | -0.784126 |
| 5                | 0.972461                | 0.914509  | 0.794027  |
| 5                | 0.349793                | -0.197085 | -1.569249 |
| 5                | -0.641680               | -1.252370 | 0.782955  |
| 5                | 0.631789                | 1.266754  | -0.772746 |
| 5                | -0.357522               | 0.203431  | 1.585641  |
| 5                | 2.665711                | 1.082486  | 2.960230  |
| 5                | 1.304911                | 2.169995  | 3.165240  |
| 5                | 1.507158                | 3.382762  | 1.951836  |
| 5                | 1.047660                | 3.983263  | -0.738759 |
| 5                | -1.291099               | -2.131010 | -3.191473 |
| 5                | -2.651564               | -1.066157 | -2.977910 |
| 5                | -2.282080               | 3.661868  | -0.114923 |
| 5                | 2.998422                | -2.804559 | -1.094257 |
| 5                | -1.461666               | -3.346188 | -1.984673 |
| 5                | 4.034754                | -0.951973 | 0.757958  |
| 5                | 2.145441                | -0.441836 | -3.637393 |
| 5                | 4.175250                | 0.681336  | 0.612083  |
| 5                | 4.229698                | 0.929828  | -1.039119 |
| 5                | -4.221797               | -0.951566 | 1.016423  |
| 5                | 2.259750                | -3.669195 | 0.150740  |
| 5                | -4.167274               | -0.700161 | -0.633795 |
| 5                | -4.038888               | 0.937974  | -0.773035 |
| 5                | -1.302782               | 1.545196  | -3.690661 |
| 5                | -1.020049               | -3.968415 | 0.720205  |
| 5                | -1.005595               | 2.920716  | -2.686675 |
| 5                | -2.402524               | 2.949239  | -1.719724 |
| 5                | 1.316836                | -1.531695 | 3.705194  |
| 5                | -3.049791               | 2.801675  | 1.104578  |
| 5                | -2.108193               | 0.420697  | 3.681725  |
| 5                | 2.392813                | -2.932760 | 1.734049  |
| 5                | 0.992255                | -2.899642 | 2.699169  |
| 6                | 0.901245                | -0.699098 | 0.952156  |
| 6                | -0.907824               | 0.709412  | -0.940138 |
| 6                | -2.499524               | 0.668846  | -3.041545 |
| 6                | 2.506158                | -0.654637 | 3.040871  |
| 6                | 3.904509                | -1.532944 | -0.708207 |
| 6                | -3.931967               | 1.513980  | 0.694835  |
| 6                | 3.424686                | 1.622071  | 1.672810  |
| 6                | -3.407420               | -1.627862 | -1.695106 |
| 6                | 1.679743                | -1.342976 | 1.957378  |
| 6                | 1.050367                | -2.863371 | -0.921112 |
| 6                | 3.085281                | -0.185004 | -0.469645 |

|   |           |           |           |
|---|-----------|-----------|-----------|
| 6 | 1.854123  | 1.706758  | 1.633590  |
| 6 | -0.502356 | 0.269283  | 3.085558  |
| 6 | -1.214464 | -2.431953 | 1.487677  |
| 6 | -1.218182 | 2.802394  | 0.923220  |
| 6 | 1.211657  | 2.440230  | -1.491207 |
| 6 | 0.515179  | -0.256256 | -3.065630 |
| 6 | -1.846137 | -1.691827 | -1.642403 |
| 6 | -3.095575 | 0.177228  | 0.465625  |
| 6 | -1.679322 | 1.356481  | -1.950746 |
| 7 | 3.161650  | -1.612525 | 1.939819  |
| 7 | -3.162101 | 1.619196  | -1.938693 |
| 7 | 3.967766  | -0.423140 | -1.676683 |
| 7 | -4.000957 | 0.403736  | 1.659280  |
| 7 | 2.722408  | 2.877080  | 1.126335  |
| 7 | -2.686811 | -2.885674 | -1.152103 |
| 5 | 1.506051  | -1.953288 | -3.251711 |
| 5 | -1.505668 | 1.943985  | 3.281666  |
| 7 | 2.195002  | 2.132588  | -2.625942 |
| 6 | 0.252010  | 3.508208  | -1.931613 |
| 5 | 2.580318  | 3.229271  | -0.452547 |
| 5 | 3.294556  | 2.263189  | -1.679587 |
| 7 | 0.100066  | -1.648304 | -3.567009 |
| 6 | 0.135516  | 1.014222  | -3.853442 |
| 5 | 1.673117  | 1.186074  | -3.667408 |
| 5 | -2.548197 | -3.256894 | 0.430675  |
| 5 | -3.271834 | -2.293178 | 1.655322  |
| 7 | -2.191386 | -2.153824 | 2.630218  |
| 6 | -0.252816 | -3.495293 | 1.938410  |
| 6 | -0.127512 | -1.017534 | 3.853252  |
| 7 | -0.082539 | 1.677471  | 3.548724  |
| 5 | -1.664145 | -1.220439 | 3.673059  |
| 7 | -1.980147 | 2.758179  | 2.153478  |
| 6 | 0.497065  | 4.055212  | 0.869820  |
| 5 | -0.850224 | 4.360914  | 0.419169  |
| 6 | -0.379593 | -3.952946 | -0.920393 |
| 7 | 1.918887  | -2.784244 | -2.118998 |
| 5 | 0.885490  | -4.425832 | -0.358813 |

3e

| Atomic<br>Number | Coordinates (Angstroms) |           |           |
|------------------|-------------------------|-----------|-----------|
|                  | X                       | Y         | Z         |
| 5                | 0.488630                | 0.862779  | -1.338215 |
| 5                | 1.342534                | -0.552973 | -0.808477 |
| 5                | -0.467407               | -0.904776 | 1.373955  |
| 5                | -1.304195               | 0.533095  | 0.844748  |
| 5                | 1.294149                | -0.747042 | 0.975711  |
| 5                | -1.262465               | 0.679173  | -0.908540 |
| 5                | 0.316512                | 0.675947  | 1.506526  |
| 5                | 0.258566                | -1.648970 | -0.095452 |
| 5                | -0.231386               | 1.627996  | 0.114966  |



|   |           |           |           |
|---|-----------|-----------|-----------|
| 5 | -0.273713 | -0.712852 | -1.470284 |
| 5 | 1.430170  | -4.526145 | 0.256576  |
| 5 | -1.332295 | 1.188206  | -3.459545 |
| 5 | -2.565011 | 1.352774  | -1.939266 |
| 5 | -1.378500 | 4.574833  | -0.238225 |
| 5 | 0.136964  | 1.992468  | 3.088733  |
| 5 | 0.494226  | -1.012508 | 4.086092  |
| 5 | -2.668950 | 2.668602  | 1.796699  |
| 5 | 2.721371  | -2.662319 | -1.883210 |
| 5 | 2.651525  | 2.237458  | -1.801335 |
| 5 | -2.652567 | -2.251457 | 1.803306  |
| 6 | -1.251556 | -0.833283 | -0.105028 |
| 6 | 1.277215  | 0.801668  | 0.129752  |
| 5 | 1.317419  | 0.780501  | 3.057644  |
| 5 | 4.816288  | -0.895026 | 0.638617  |
| 5 | 2.603235  | -0.860069 | -1.917878 |
| 5 | -0.454899 | 3.241001  | 0.405918  |
| 5 | 0.067708  | 2.379584  | -2.917908 |
| 5 | -4.777822 | 0.840258  | -0.777847 |
| 5 | -2.610858 | 0.854355  | 1.887616  |
| 5 | -0.077514 | -2.344903 | 3.160789  |
| 5 | 0.474208  | -3.248994 | -0.392237 |
| 5 | -1.383242 | -0.728380 | -3.094028 |
| 5 | -2.528396 | -1.621669 | 0.184586  |
| 5 | 2.545060  | 1.594825  | -0.178327 |
| 7 | 2.418713  | 3.165948  | -0.499828 |
| 7 | -2.406047 | -3.182318 | 0.527833  |
| 5 | 2.679205  | -1.519507 | 1.796248  |
| 6 | 4.719879  | 0.407712  | 1.172380  |
| 6 | -4.760316 | -0.491303 | -1.212542 |
| 6 | 4.101434  | -0.179179 | -1.847223 |
| 6 | -4.120919 | 0.177644  | 1.730644  |
| 6 | 1.348430  | 1.665371  | -2.584906 |
| 6 | -1.356679 | -1.685963 | 2.597073  |
| 6 | 1.207853  | 3.888496  | -0.214097 |
| 6 | -1.171338 | -3.898193 | 0.266053  |
| 6 | 2.632073  | 2.356488  | 1.959853  |
| 6 | -2.620987 | -2.416020 | -1.939429 |
| 5 | 3.966440  | 1.280409  | -1.471950 |
| 5 | 4.394613  | 1.558978  | 0.168756  |
| 6 | 3.344684  | 2.595478  | 0.722756  |
| 6 | -3.327429 | -2.644480 | -0.698133 |
| 5 | -3.968447 | -1.290869 | 1.449732  |
| 5 | -4.396717 | -1.612962 | -0.181802 |
| 5 | 3.551151  | -0.001237 | 2.072104  |
| 5 | 3.255552  | -2.539625 | 0.443432  |
| 7 | 4.516404  | -2.023947 | -0.117930 |
| 7 | 2.715268  | 1.143047  | 2.605151  |
| 5 | 1.226745  | 3.053614  | 2.222055  |
| 5 | 0.227378  | 0.456688  | 4.214553  |
| 5 | -0.048732 | 4.240373  | -1.118329 |
| 5 | -2.373656 | 3.649423  | 0.513005  |

|   |           |           |           |
|---|-----------|-----------|-----------|
| 7 | 0.742624  | 3.849548  | 1.134158  |
| 7 | -0.553989 | 3.538572  | -2.385384 |
| 5 | -1.596417 | 2.604329  | -2.672313 |
| 5 | 1.272414  | 0.412613  | -3.579717 |
| 5 | 1.547890  | -1.903022 | -3.022267 |
| 5 | 4.165828  | -1.633958 | -1.526563 |
| 7 | 2.186530  | -0.682518 | -3.416673 |
| 5 | -3.577596 | -0.098486 | -2.096232 |
| 7 | -4.382412 | 1.984340  | -0.091516 |
| 5 | -3.138131 | 2.538235  | -0.655130 |
| 7 | -0.724250 | -3.876288 | -1.088690 |
| 5 | 0.100091  | -4.160696 | 1.179317  |
| 5 | 2.383427  | -3.681360 | -0.642548 |
| 5 | -0.330609 | 0.049825  | -4.093885 |
| 5 | -0.163616 | -1.919505 | -2.970883 |
| 5 | -1.207298 | -3.074633 | -2.172818 |
| 7 | -2.730175 | -1.217134 | -2.595912 |
| 7 | -2.200646 | 0.717985  | 3.376251  |
| 5 | -4.107988 | 1.607494  | 1.332079  |
| 5 | -1.594761 | 1.979185  | 3.018848  |
| 5 | -1.273312 | -0.377256 | 3.508389  |
| 5 | 1.729302  | -2.638272 | 2.460533  |
| 7 | 0.604472  | -3.444996 | 2.474751  |

CBN clusters from pentagonal pyramid isomer IV

4a

| Atomic<br>Number | Coordinates (Angstroms) |           |           |
|------------------|-------------------------|-----------|-----------|
|                  | X                       | Y         | Z         |
| 5                | -0.038985               | 1.356430  | 0.785360  |
| 5                | 1.363086                | 0.705522  | 0.224292  |
| 5                | 0.038985                | -1.356430 | -0.785360 |
| 5                | -1.363086               | -0.705522 | -0.224292 |
| 5                | 1.244360                | -0.916945 | 0.266656  |
| 5                | -1.244360               | 0.916945  | -0.266656 |
| 5                | -0.241034               | -1.267175 | 0.842407  |
| 5                | 1.036380                | -0.124942 | -1.169996 |
| 5                | -1.036380               | 0.124942  | 1.169996  |
| 5                | 0.241034                | 1.267175  | -0.842407 |
| 5                | -3.136068               | 1.811601  | -1.978292 |
| 5                | 0.235113                | -2.450506 | 3.109084  |
| 5                | 3.136068                | -1.811601 | 1.978292  |
| 5                | -0.235113               | 2.450506  | -3.109084 |
| 5                | -1.484288               | 0.144276  | 3.845104  |
| 5                | -3.216503               | -1.425673 | -1.959934 |
| 5                | 3.216503                | 1.425673  | 1.959934  |
| 5                | 0.174502                | 0.101414  | 4.192267  |
| 5                | 1.207878                | 1.342033  | 3.839660  |

|   |           |           |           |
|---|-----------|-----------|-----------|
| 5 | -1.207878 | -1.342033 | -3.839660 |
| 6 | -0.558927 | 0.002639  | -1.429930 |
| 6 | 0.558927  | -0.002639 | 1.429930  |
| 6 | 2.489736  | 0.653873  | 3.175080  |
| 6 | -2.489736 | -0.653873 | -3.175080 |
| 6 | -2.638224 | -2.769344 | -1.259277 |
| 6 | 2.638224  | 2.769344  | 1.259277  |
| 6 | -3.841561 | 1.082235  | -0.739958 |
| 6 | 3.841561  | -1.082235 | 0.739958  |
| 6 | 0.843714  | -3.399886 | 1.965791  |
| 6 | -0.843714 | 3.399886  | -1.965791 |
| 6 | -2.270724 | -1.063498 | 3.176242  |
| 6 | 2.012831  | -0.171614 | -2.229246 |
| 6 | 0.125604  | -2.614441 | -1.484338 |
| 6 | -2.590672 | -1.430486 | -0.396881 |
| 6 | -2.424245 | 1.724660  | -0.451756 |
| 6 | 0.431830  | 2.482372  | -1.581551 |
| 6 | -0.125604 | 2.614441  | 1.484338  |
| 6 | 2.590672  | 1.430486  | 0.396881  |
| 6 | 2.424245  | -1.724660 | 0.451756  |
| 6 | -0.431830 | -2.482372 | 1.581551  |
| 6 | -2.012831 | 0.171614  | 2.229246  |
| 6 | 1.070217  | 0.051707  | 2.771300  |
| 6 | -1.070217 | -0.051707 | -2.771300 |
| 5 | -2.439412 | 0.902343  | -3.220375 |
| 5 | -0.174502 | -0.101414 | -4.192267 |
| 7 | -0.969979 | 1.205087  | -3.685092 |
| 7 | 0.969979  | -1.205087 | 3.685092  |
| 5 | 2.439412  | -0.902343 | 3.220375  |
| 5 | 3.500842  | 0.619470  | -2.220973 |
| 6 | 2.270724  | 1.063498  | -3.176242 |
| 5 | -3.500842 | -0.619470 | 2.220973  |
| 5 | 1.423117  | -3.686567 | -1.434950 |
| 5 | -1.423117 | 3.686567  | 1.434950  |
| 5 | -3.004763 | -2.880394 | 0.323892  |
| 5 | 3.004763  | 2.880394  | -0.323892 |
| 5 | -3.691416 | 1.898276  | 0.645210  |
| 5 | 3.691416  | -1.898276 | -0.645210 |
| 5 | 0.293807  | 4.050877  | -1.003855 |
| 5 | -0.293807 | -4.050877 | 1.003855  |
| 7 | 3.885420  | 0.616964  | 0.756366  |
| 5 | 3.838585  | 1.447035  | -0.688903 |
| 5 | 2.666983  | -3.200607 | -0.284445 |
| 7 | 2.325331  | -3.004926 | 1.331852  |
| 7 | -1.330940 | -2.433280 | 2.858045  |
| 5 | -1.776381 | -3.427113 | 1.518999  |
| 7 | -2.090070 | 1.439310  | 3.129470  |
| 5 | -3.399598 | 1.074229  | 2.181680  |
| 7 | 1.175759  | 3.382500  | 1.818141  |
| 6 | -1.087277 | 2.796366  | 2.736592  |
| 7 | 1.330940  | 2.433280  | -2.858045 |
| 5 | 1.776381  | 3.427113  | -1.518999 |

|   |           |           |           |
|---|-----------|-----------|-----------|
| 7 | -2.325331 | 3.004926  | -1.331852 |
| 5 | -2.666983 | 3.200607  | 0.284445  |
| 7 | 2.090070  | -1.439310 | -3.129470 |
| 5 | 3.399598  | -1.074229 | -2.181680 |
| 5 | 1.484288  | -0.144276 | -3.845104 |
| 7 | -3.885420 | -0.616964 | -0.756366 |
| 5 | -3.838585 | -1.447035 | 0.688903  |
| 5 | 0.477042  | 2.700646  | 3.090765  |
| 5 | -0.477042 | -2.700646 | -3.090765 |
| 7 | -1.175759 | -3.382500 | -1.818141 |
| 5 | -0.072509 | -4.092439 | -0.764783 |
| 6 | 1.087277  | -2.796366 | -2.736592 |
| 5 | 0.072509  | 4.092439  | 0.764783  |

4b

| Atomic<br>Number | Coordinates (Angstroms) |           |           |
|------------------|-------------------------|-----------|-----------|
|                  | X                       | Y         | Z         |
| 5                | -0.072799               | 1.397605  | 0.754654  |
| 5                | 1.361898                | 0.793263  | 0.172543  |
| 5                | 0.072799                | -1.397605 | -0.754654 |
| 5                | -1.361898               | -0.793263 | -0.172543 |
| 5                | 1.267688                | -0.890654 | 0.254825  |
| 5                | -1.267688               | 0.890654  | -0.254825 |
| 5                | -0.213393               | -1.380460 | 0.901257  |
| 5                | 1.030947                | -0.077428 | -1.177264 |
| 5                | -1.030947               | 0.077428  | 1.177264  |
| 5                | 0.213393                | 1.380460  | -0.901257 |
| 5                | -2.449457               | 3.089308  | -1.408703 |
| 5                | -2.176791               | 1.503129  | 3.176184  |
| 5                | 2.449457                | -3.089308 | 1.408703  |
| 5                | -1.272253               | -3.612758 | -1.882414 |
| 5                | -4.066145               | -0.654770 | -0.650047 |
| 5                | 1.606917                | 2.798380  | -2.746112 |
| 5                | 4.066145                | 0.654770  | 0.650047  |
| 5                | 0.182060                | 0.217899  | 3.988577  |
| 5                | 1.101941                | 1.559915  | 3.556134  |
| 5                | -1.606917               | -2.798380 | 2.746112  |
| 5                | 1.272253                | 3.612758  | 1.882414  |
| 5                | -1.101941               | -1.559915 | -3.556134 |
| 6                | -0.556981               | -0.015808 | -1.359745 |
| 6                | 0.556981                | 0.015808  | 1.359745  |
| 6                | 2.527876                | 0.899084  | 2.917014  |
| 6                | -2.527876               | -0.899084 | -2.917014 |
| 6                | 1.986725                | -0.096475 | -2.260866 |
| 6                | 0.135366                | -2.669904 | -1.488901 |
| 6                | -2.619984               | -1.517038 | -0.379981 |
| 6                | -2.455889               | 1.690781  | -0.492223 |
| 6                | 0.479384                | 2.752070  | -1.491281 |
| 6                | -0.135366               | 2.669904  | 1.488901  |

|   |           |           |           |
|---|-----------|-----------|-----------|
| 6 | 2.619984  | 1.517038  | 0.379981  |
| 6 | 2.455889  | -1.690781 | 0.492223  |
| 6 | -0.479384 | -2.752070 | 1.491281  |
| 6 | -1.986725 | 0.096475  | 2.260866  |
| 6 | 1.126296  | 0.177748  | 2.634115  |
| 6 | -1.126296 | -0.177748 | -2.634115 |
| 5 | -2.489426 | 0.694684  | -3.023953 |
| 5 | -0.182060 | -0.217899 | -3.988577 |
| 7 | -1.151184 | 0.922598  | -3.643720 |
| 7 | 1.151184  | -0.922598 | 3.643720  |
| 5 | 2.489426  | -0.694684 | 3.023953  |
| 5 | 2.176791  | -1.503129 | -3.176184 |
| 5 | -3.505394 | -0.590410 | 2.139404  |
| 5 | 1.396156  | -3.703586 | -1.281248 |
| 5 | -1.396156 | 3.703586  | 1.281248  |
| 5 | -3.144229 | -2.878314 | 0.361944  |
| 5 | 3.144229  | 2.878314  | -0.361944 |
| 5 | -3.577438 | 1.920117  | 0.707726  |
| 5 | 3.577438  | -1.920117 | -0.707726 |
| 5 | -0.853534 | -3.957508 | 0.508177  |
| 7 | 1.504848  | -0.106840 | -3.724325 |
| 5 | 2.330885  | 1.232312  | -3.211904 |
| 5 | -1.013578 | 3.408686  | -2.299539 |
| 7 | 0.160846  | 3.314815  | -2.912602 |
| 7 | -3.164374 | 1.729806  | -1.887036 |
| 5 | -4.005533 | 1.059665  | -0.709561 |
| 6 | -2.623104 | 3.149586  | 0.176259  |
| 6 | 2.020096  | 3.546752  | -1.386578 |
| 5 | 0.853534  | 3.957508  | -0.508177 |
| 5 | 3.505394  | 0.590410  | -2.139404 |
| 6 | 3.306698  | -1.023122 | -2.163382 |
| 6 | -3.825366 | -1.450306 | 0.677125  |
| 5 | -2.801446 | -2.977536 | -1.281205 |
| 7 | -3.281331 | -1.567763 | -1.774566 |
| 7 | -0.419104 | -2.832492 | -2.920899 |
| 5 | 1.201222  | -2.914345 | -2.778966 |
| 6 | -0.173827 | -4.121935 | -0.882032 |
| 6 | 0.173827  | 4.121935  | 0.882032  |
| 7 | 0.419104  | 2.832492  | 2.920899  |
| 7 | 3.281331  | 1.567763  | 1.774566  |
| 6 | 3.825366  | 1.450306  | -0.677125 |
| 5 | 2.801446  | 2.977536  | 1.281205  |
| 5 | -1.201222 | 2.914345  | 2.778966  |
| 6 | 2.623104  | -3.149586 | -0.176259 |
| 7 | 3.164374  | -1.729806 | 1.887036  |
| 5 | 4.005533  | -1.059665 | 0.709561  |
| 5 | 1.013578  | -3.408686 | 2.299539  |
| 6 | -2.020096 | -3.546752 | 1.386578  |
| 7 | -0.160846 | -3.314815 | 2.912602  |
| 7 | -1.504848 | 0.106840  | 3.724325  |
| 6 | -3.306698 | 1.023122  | 2.163382  |
| 5 | -2.330885 | -1.232312 | 3.211904  |

4c

| Atomic<br>Number | Coordinates (Angstroms) |           |           |
|------------------|-------------------------|-----------|-----------|
|                  | X                       | Y         | Z         |
| 5                | 1.049753                | 0.780796  | -0.856465 |
| 5                | 1.211958                | 0.578246  | 0.761514  |
| 5                | -1.049753               | -0.780796 | 0.856465  |
| 5                | -1.211958               | -0.578246 | -0.761514 |
| 5                | -0.259716               | 0.550958  | 1.440422  |
| 5                | 0.259716                | -0.550958 | -1.440422 |
| 5                | -1.330642               | 0.717456  | 0.232574  |
| 5                | 0.538811                | -0.867651 | 1.183981  |
| 5                | -0.538811               | 0.867651  | -1.183981 |
| 5                | 1.330642                | -0.717456 | -0.232574 |
| 5                | 0.435276                | -2.675444 | -3.195768 |
| 5                | -2.550668               | 3.019130  | 0.737150  |
| 5                | -0.435276               | 2.675444  | 3.195768  |
| 5                | 2.204556                | 3.173188  | -1.622021 |
| 5                | 2.550668                | -3.019130 | -0.737150 |
| 5                | -1.142648               | 3.347999  | -2.228517 |
| 5                | -2.527060               | -2.749038 | -1.644744 |
| 5                | -2.204556               | -3.173188 | 1.622021  |
| 5                | 2.527060                | 2.749038  | 1.644744  |
| 5                | -0.397552               | 4.063421  | -0.843666 |
| 5                | 1.221111                | 4.009522  | -0.435015 |
| 5                | -1.221111               | -4.009522 | 0.435015  |
| 6                | -0.051604               | -1.521014 | -0.171231 |
| 6                | 0.051604                | 1.521014  | 0.171231  |
| 6                | 1.265252                | 3.689457  | 1.148721  |
| 6                | -1.265252               | -3.689457 | -1.148721 |
| 6                | 1.113545                | -1.678591 | 2.223789  |
| 6                | -1.971698               | -1.507768 | 1.689160  |
| 6                | -2.380786               | -1.117313 | -1.386437 |
| 6                | 0.421194                | -1.067311 | -2.774587 |
| 6                | 2.553427                | -1.391235 | -0.535359 |
| 6                | 1.971698                | 1.507768  | -1.689160 |
| 6                | 2.380786                | 1.117313  | 1.386437  |
| 6                | -0.421194               | 1.067311  | 2.774587  |
| 6                | -2.553427               | 1.391235  | 0.535359  |
| 6                | -1.113545               | 1.678591  | -2.223789 |
| 6                | 0.139702                | 2.942872  | 0.291576  |
| 6                | -0.139702               | -2.942872 | -0.291576 |
| 5                | 0.156954                | -3.690649 | -1.827598 |
| 5                | 0.397552                | -4.063421 | 0.843666  |
| 7                | 1.148887                | -3.764763 | -0.586180 |
| 7                | -1.148887               | 3.764763  | 0.586180  |
| 5                | -0.156954               | 3.690649  | 1.827598  |
| 5                | 1.142648                | -3.347999 | 2.228517  |
| 6                | -3.721966               | 0.745821  | 1.412713  |

|   |           |           |           |
|---|-----------|-----------|-----------|
| 7 | -3.237307 | 2.271135  | -0.545819 |
| 5 | -3.927307 | 0.856048  | -0.177178 |
| 5 | -2.913285 | 1.995047  | 2.043649  |
| 5 | -2.551032 | 2.439219  | -2.109412 |
| 5 | -0.936208 | 1.146910  | -3.774648 |
| 7 | -0.204105 | 2.443353  | -3.222963 |
| 6 | -2.382499 | 1.165427  | -3.075376 |
| 6 | 2.313363  | 1.023576  | -3.186525 |
| 5 | 3.405347  | 0.758824  | -2.043768 |
| 5 | 1.521053  | 2.412925  | -2.983952 |
| 7 | 3.301006  | 2.043847  | -1.113758 |
| 7 | 2.308028  | 1.648100  | 2.848428  |
| 7 | -1.746524 | 1.726500  | 3.221357  |
| 5 | 3.063710  | 0.264045  | 2.615565  |
| 5 | 3.565326  | 1.917906  | 0.560314  |
| 5 | -1.473295 | 0.257581  | 3.770021  |
| 5 | 0.813187  | 1.639590  | 3.689814  |
| 6 | 0.102336  | 0.243319  | 4.058165  |
| 6 | 3.831041  | 0.455657  | 1.211421  |
| 6 | 3.721966  | -0.745821 | -1.412713 |
| 5 | 3.927307  | -0.856048 | 0.177178  |
| 7 | 3.237307  | -2.271135 | 0.545819  |
| 5 | 2.913285  | -1.995047 | -2.043649 |
| 5 | 1.473295  | -0.257581 | -3.770021 |
| 5 | -0.813187 | -1.639590 | -3.689814 |
| 6 | -0.102336 | -0.243319 | -4.058165 |
| 7 | 1.746524  | -1.726500 | -3.221357 |
| 7 | -2.308028 | -1.648100 | -2.848428 |
| 5 | -3.063710 | -0.264045 | -2.615565 |
| 5 | -3.565326 | -1.917906 | -0.560314 |
| 6 | -3.831041 | -0.455657 | -1.211421 |
| 6 | -2.313363 | -1.023576 | 3.186525  |
| 5 | -3.405347 | -0.758824 | 2.043768  |
| 5 | -1.521053 | -2.412925 | 2.983952  |
| 7 | -3.301006 | -2.043847 | 1.113758  |
| 7 | 0.204105  | -2.443353 | 3.222963  |
| 6 | 2.382499  | -1.165427 | 3.075376  |
| 5 | 2.551032  | -2.439219 | 2.109412  |
| 5 | 0.936208  | -1.146910 | 3.774648  |

4d

| Atomic<br>Number | Coordinates (Angstroms) |           |           |
|------------------|-------------------------|-----------|-----------|
|                  | X                       | Y         | Z         |
| 5                | -0.184060               | 1.522590  | -0.151859 |
| 5                | 1.146518                | 0.739458  | -0.720097 |
| 5                | 0.184060                | -1.522590 | 0.151859  |
| 5                | -1.146518               | -0.739458 | 0.720097  |
| 5                | 1.483127                | -0.520294 | 0.257525  |
| 5                | -1.483127               | 0.520294  | -0.257525 |

|   |           |           |           |
|---|-----------|-----------|-----------|
| 5 | 0.310225  | -0.492312 | 1.412657  |
| 5 | 0.713532  | -0.763420 | -1.183025 |
| 5 | -0.713532 | 0.763420  | 1.183025  |
| 5 | -0.310225 | 0.492312  | -1.412657 |
| 5 | -3.988468 | 0.081982  | -1.422396 |
| 5 | -3.269995 | 1.483949  | -2.040672 |
| 5 | 1.569639  | 0.007649  | 3.742728  |
| 5 | 3.269995  | -1.483949 | 2.040672  |
| 5 | 3.988468  | -0.081982 | 1.422396  |
| 5 | -1.569639 | -0.007649 | -3.742728 |
| 5 | -3.225184 | -2.493947 | 0.635131  |
| 5 | -3.802670 | -0.990339 | 1.183852  |
| 5 | 0.099334  | 0.124911  | -4.026099 |
| 5 | 3.802670  | 0.990339  | -1.183852 |
| 5 | 3.225184  | 2.493947  | -0.635131 |
| 5 | 1.115573  | 2.659648  | 2.958505  |
| 5 | 1.573477  | 3.415618  | 1.521226  |
| 5 | -0.099334 | -0.124911 | 4.026099  |
| 5 | 0.719045  | 3.794077  | -1.157297 |
| 5 | -1.573477 | -3.415618 | -1.521226 |
| 6 | -0.881638 | -0.877680 | -0.857605 |
| 6 | 0.881638  | 0.877680  | 0.857605  |
| 6 | 2.878866  | 2.648111  | 1.001771  |
| 6 | -2.878866 | -2.648111 | -1.001771 |
| 6 | -2.090579 | -3.019983 | 1.712522  |
| 6 | 2.090579  | 3.019983  | -1.712522 |
| 6 | -4.119444 | 0.331481  | 0.185624  |
| 6 | 4.119444  | -0.331481 | -0.185624 |
| 6 | 2.053216  | -1.450331 | 3.204101  |
| 6 | -2.053216 | 1.450331  | -3.204101 |
| 6 | 1.391376  | -1.470746 | -2.245538 |
| 6 | 0.408955  | -2.927630 | 0.329062  |
| 6 | -2.203119 | -1.461321 | 1.367544  |
| 6 | -2.843178 | 0.924624  | -0.550283 |
| 6 | -0.622816 | 0.903108  | -2.746081 |
| 6 | -0.408955 | 2.927630  | -0.329062 |
| 6 | 2.203119  | 1.461321  | -1.367544 |
| 6 | 2.843178  | -0.924624 | 0.550283  |
| 6 | 0.622816  | -0.903108 | 2.746081  |
| 6 | -1.391376 | 1.470746  | 2.245538  |
| 6 | 1.679785  | 1.764534  | 1.615026  |
| 6 | -1.679785 | -1.764534 | -1.615026 |
| 5 | -3.325477 | -1.453407 | -1.953690 |
| 5 | -1.115573 | -2.659648 | -2.958505 |
| 7 | -2.124938 | -1.423537 | -3.049356 |
| 7 | 2.124938  | 1.423537  | 3.049356  |
| 5 | 3.325477  | 1.453407  | 1.953690  |
| 5 | 2.592917  | -0.707773 | -3.062266 |
| 5 | 0.562608  | -2.456272 | -3.314255 |
| 5 | 1.908476  | -3.549762 | 0.632519  |
| 5 | -1.908476 | 3.549762  | -0.632519 |
| 5 | -1.877345 | -1.980572 | 2.893309  |



|   |           |           |           |
|---|-----------|-----------|-----------|
| 7 | -2.899498 | -0.812171 | 2.610961  |
| 7 | 2.899498  | 0.812171  | -2.610961 |
| 5 | 1.877345  | 1.980572  | -2.893309 |
| 5 | -3.711437 | 1.802491  | 0.614330  |
| 7 | -3.128978 | 2.446491  | -0.754235 |
| 7 | 3.128978  | -2.446491 | 0.754235  |
| 5 | 3.711437  | -1.802491 | -0.614330 |
| 5 | -0.877049 | 2.495010  | -3.032903 |
| 7 | 0.456590  | 1.635864  | -3.586906 |
| 7 | -0.456590 | -1.635864 | 3.586906  |
| 5 | 0.877049  | -2.495010 | 3.032903  |
| 7 | 0.425423  | 3.960613  | 0.435748  |
| 5 | -2.957914 | 2.104411  | 2.165297  |
| 6 | -0.734089 | 3.566473  | -1.768760 |
| 5 | -1.165578 | 3.826588  | 0.876472  |
| 7 | -1.173695 | 1.004877  | 3.721029  |
| 5 | -0.562608 | 2.456272  | 3.314255  |
| 6 | -1.633065 | 3.030897  | 2.298160  |
| 5 | -2.592917 | 0.707773  | 3.062266  |
| 7 | -0.425423 | -3.960613 | -0.435748 |
| 6 | 0.734089  | -3.566473 | 1.768760  |
| 5 | 1.165578  | -3.826588 | -0.876472 |
| 5 | -0.719045 | -3.794077 | 1.157297  |
| 5 | 2.957914  | -2.104411 | -2.165297 |
| 7 | 1.173695  | -1.004877 | -3.721029 |
| 6 | 1.633065  | -3.030897 | -2.298160 |

4f

| Atomic<br>Number | Coordinates (Angstroms) |           |           |
|------------------|-------------------------|-----------|-----------|
|                  | X                       | Y         | Z         |
| 5                | 0.901379                | -0.977426 | -1.385935 |
| 5                | -0.732281               | -1.457529 | -0.814912 |
| 5                | -0.886312               | 0.558209  | 1.011812  |
| 5                | 0.692143                | 1.018406  | 0.607402  |
| 5                | -0.962518               | -1.058866 | 0.776836  |
| 5                | 0.580982                | -1.742730 | 0.168014  |
| 5                | 0.966914                | 0.821373  | -1.059942 |
| 5                | -0.584070               | 1.293655  | -0.464161 |
| 5                | -1.650656               | -0.051110 | -0.401589 |
| 5                | 1.652581                | -0.306810 | 0.028986  |
| 5                | 1.321267                | 3.676729  | -1.767166 |
| 5                | 1.959248                | -0.374374 | -3.444276 |
| 5                | 0.867166                | 2.668861  | -2.977388 |
| 5                | 4.595652                | -0.422388 | -0.306189 |
| 5                | -1.590904               | -3.626174 | 1.418829  |
| 5                | -1.069282               | 2.323841  | 3.225263  |
| 5                | -3.010383               | -0.937091 | 2.530318  |
| 5                | 4.348204                | 1.154372  | 0.186008  |
| 5                | -1.701397               | 2.214688  | -3.076406 |

|   |           |           |           |
|---|-----------|-----------|-----------|
| 5 | 0.621532  | 3.697696  | 1.444806  |
| 5 | 1.415328  | 0.239518  | 3.807479  |
| 5 | 2.109727  | 3.349262  | 0.820413  |
| 5 | -1.311842 | 0.735410  | 3.808189  |
| 5 | -2.836944 | 0.791995  | -2.979682 |
| 5 | -2.157978 | -1.893912 | -2.975483 |
| 5 | -3.432558 | -2.123654 | -1.773080 |
| 5 | -3.985782 | 1.823786  | -0.738348 |
| 5 | -0.075738 | -0.542475 | 4.008249  |
| 5 | -0.522551 | -4.036520 | 0.144308  |
| 5 | -4.199827 | 1.010707  | 0.703202  |
| 5 | 1.553957  | -3.465335 | -0.958820 |
| 5 | 0.712763  | -2.867407 | -2.427845 |
| 5 | -2.059930 | 3.446077  | 0.761002  |
| 5 | -2.863753 | 3.156402  | -0.709296 |
| 6 | -2.266018 | 2.634233  | 2.167977  |
| 6 | -1.714405 | 3.358550  | -1.855115 |
| 6 | -3.977332 | 0.653318  | -1.858398 |
| 6 | -0.900375 | -2.984301 | -2.621460 |
| 6 | -0.261545 | 1.842987  | -3.714669 |
| 6 | 2.465533  | 3.221300  | -0.745061 |
| 6 | 0.416851  | 2.835613  | 2.780930  |
| 6 | 0.093052  | -2.069519 | 3.273734  |
| 6 | 2.963461  | -2.917263 | -0.892199 |
| 6 | -2.924920 | -2.857860 | 0.771301  |
| 6 | 3.590490  | 1.062548  | 1.575138  |
| 6 | 3.233491  | 0.224185  | -2.691000 |
| 6 | 0.475542  | -0.452117 | 1.234459  |
| 6 | -0.413205 | 0.031573  | -1.627040 |
| 6 | 0.805063  | -0.716813 | 2.574445  |
| 6 | -1.588860 | 1.165690  | 2.161088  |
| 6 | -1.888261 | -1.697686 | 1.752069  |
| 6 | -3.132379 | 0.263461  | -0.523963 |
| 6 | -1.243242 | 2.610742  | -0.560587 |
| 6 | -1.338976 | -2.825143 | -1.037719 |
| 6 | 0.914270  | -3.257387 | 0.422883  |
| 6 | 1.776029  | -1.755491 | -2.705580 |
| 6 | -0.672957 | 0.171120  | -3.055943 |
| 6 | 3.084239  | -0.074876 | 0.423147  |
| 6 | 1.721985  | 1.899610  | -1.822268 |
| 6 | 1.186930  | 2.095515  | 1.467874  |
| 5 | -0.331157 | 3.932429  | -1.186555 |
| 7 | -0.583395 | 3.884481  | 0.372275  |
| 7 | 2.654891  | 2.179136  | 1.958256  |
| 5 | 1.623045  | 1.898098  | 3.177371  |
| 5 | 3.647171  | 2.182268  | -0.992699 |
| 7 | 3.124960  | 1.494769  | -2.208800 |
| 7 | 3.971466  | -1.293757 | 0.967950  |
| 5 | 3.426587  | -0.406120 | 2.118852  |
| 5 | 4.006877  | -0.850886 | -1.855240 |
| 7 | 3.158625  | -2.020591 | -1.936648 |
| 7 | 2.054030  | -3.004871 | 1.486489  |

|   |           |           |           |
|---|-----------|-----------|-----------|
| 5 | 3.195868  | -2.589897 | 0.620773  |
| 5 | -0.575381 | -4.173173 | -1.590411 |
| 7 | -2.770274 | -2.870134 | -0.717471 |
| 7 | -1.157587 | -2.734435 | 2.585163  |
| 5 | -3.830937 | -1.682300 | 1.291087  |
| 5 | -4.331772 | -0.782263 | -1.293129 |
| 7 | -4.279655 | -0.548720 | 0.285982  |
| 7 | -2.731185 | 0.405022  | 3.052054  |
| 5 | -3.379286 | 1.512253  | 2.134760  |
| 5 | 0.527310  | 0.486094  | -3.953480 |
| 7 | -1.992843 | -0.429018 | -3.339108 |
| 7 | 2.312840  | -0.941973 | 3.012754  |
| 5 | 1.605563  | -2.345950 | 2.738769  |

4g

| Atomic<br>Number | Coordinates (Angstroms) |           |           |
|------------------|-------------------------|-----------|-----------|
|                  | X                       | Y         | Z         |
| 5                | -0.051593               | 1.347355  | 0.789728  |
| 5                | 1.351423                | 0.713402  | 0.220847  |
| 5                | 0.051593                | -1.347355 | -0.789728 |
| 5                | -1.351423               | -0.713402 | -0.220847 |
| 5                | 1.250101                | -0.905057 | 0.252863  |
| 5                | -1.250101               | 0.905057  | -0.252863 |
| 5                | -0.228131               | -1.267095 | 0.822140  |
| 5                | 1.036453                | -0.110290 | -1.166387 |
| 5                | -1.036453               | 0.110290  | 1.166387  |
| 5                | 0.228131                | 1.267095  | -0.822140 |
| 5                | -3.276920               | 1.875519  | -1.942392 |
| 5                | -2.320912               | 3.123482  | -1.339568 |
| 5                | 0.199290                | -2.589099 | 3.132962  |
| 5                | -2.115954               | 1.564928  | 3.168238  |
| 5                | 2.320912                | -3.123482 | 1.339568  |
| 5                | 3.276920                | -1.875519 | 1.942392  |
| 5                | 0.419482                | 2.844548  | 3.120238  |
| 5                | -1.268312               | -3.472002 | -1.795316 |
| 5                | -0.199290               | 2.589099  | -3.132962 |
| 5                | -1.620101               | 0.113834  | 3.912725  |
| 5                | -3.323932               | -1.513628 | -1.926838 |
| 5                | -4.008209               | -0.555585 | -0.702255 |
| 5                | 1.489067                | 2.457404  | -2.883908 |
| 5                | -0.419482               | -2.844548 | -3.120238 |
| 5                | 4.008209                | 0.555585  | 0.702255  |
| 5                | 3.323932                | 1.513628  | 1.926838  |
| 5                | 0.133287                | 0.038908  | 4.171372  |
| 5                | 1.130185                | 1.353438  | 3.819606  |
| 5                | -1.489067               | -2.457404 | 2.883908  |
| 5                | 1.268312                | 3.472002  | 1.795316  |
| 5                | -1.130185               | -1.353438 | -3.819606 |

|   |           |           |           |
|---|-----------|-----------|-----------|
| 6 | -0.561337 | 0.007522  | -1.428649 |
| 6 | 0.561337  | -0.007522 | 1.428649  |
| 6 | 2.473231  | 0.715914  | 3.152923  |
| 6 | -2.473231 | -0.715914 | -3.152923 |
| 6 | -2.677189 | -2.840123 | -1.149800 |
| 6 | 2.677189  | 2.840123  | 1.149800  |
| 6 | -3.903040 | 1.113923  | -0.630791 |
| 6 | 3.903040  | -1.113923 | 0.630791  |
| 6 | 0.789358  | -3.493793 | 1.904485  |
| 6 | -0.789358 | 3.493793  | -1.904485 |
| 6 | 1.172019  | -2.870829 | -2.682411 |
| 6 | -1.172019 | 2.870829  | 2.682411  |
| 6 | -2.402553 | -1.090716 | 3.129058  |
| 6 | 1.950000  | -0.191668 | -2.281359 |
| 6 | 0.067967  | -2.575621 | -1.548087 |
| 6 | -2.594401 | -1.390306 | -0.459158 |
| 6 | -2.417516 | 1.704675  | -0.540141 |
| 6 | 0.405005  | 2.440316  | -1.618646 |
| 6 | -0.067967 | 2.575621  | 1.548087  |
| 6 | 2.594401  | 1.390306  | 0.459158  |
| 6 | 2.417516  | -1.704675 | 0.540141  |
| 6 | -0.405005 | -2.440316 | 1.618646  |
| 6 | -1.950000 | 0.191668  | 2.281359  |
| 6 | 1.070315  | 0.035778  | 2.763901  |
| 6 | -1.070315 | -0.035778 | -2.763901 |
| 5 | -2.500827 | 0.867022  | -3.161506 |
| 5 | -0.133287 | -0.038908 | -4.171372 |
| 7 | -1.009261 | 1.247461  | -3.646906 |
| 7 | 1.009261  | -1.247461 | 3.646906  |
| 5 | 2.500827  | -0.867022 | 3.161506  |
| 5 | 3.389674  | 0.602934  | -2.019477 |
| 7 | 3.279275  | -0.984255 | -2.043061 |
| 5 | 2.115954  | -1.564928 | -3.168238 |
| 5 | 1.620101  | -0.113834 | -3.912725 |
| 6 | 2.402553  | 1.090716  | -3.129058 |
| 7 | -3.279275 | 0.984255  | 2.043061  |
| 5 | -3.389674 | -0.602934 | 2.019477  |
| 7 | -0.021794 | -3.913369 | -0.710277 |
| 5 | 1.417007  | -3.505763 | -1.271776 |
| 7 | 0.021794  | 3.913369  | 0.710277  |
| 5 | -1.417007 | 3.505763  | 1.271776  |
| 5 | -2.823134 | -2.766099 | 0.409713  |
| 7 | -3.656118 | -1.409819 | 0.685300  |
| 7 | 3.656118  | 1.409819  | -0.685300 |
| 5 | 2.823134  | 2.766099  | -0.409713 |
| 5 | -3.498229 | 1.793405  | 0.717716  |
| 7 | -2.566979 | 3.030001  | 0.302752  |
| 7 | 2.566979  | -3.030001 | -0.302752 |
| 5 | 3.498229  | -1.793405 | -0.717716 |
| 5 | 0.302144  | 3.872462  | -0.841179 |
| 7 | 1.695544  | 3.281186  | -1.444857 |
| 7 | -1.695544 | -3.281186 | 1.444857  |

5            -0.302144 -3.872462 0.841179

CBN clusters from pentagonal pyramid isomer V

5a

| Atomic<br>Number | Coordinates (Angstroms) |           |           |
|------------------|-------------------------|-----------|-----------|
|                  | X                       | Y         | Z         |
| 5                | 0.020411                | 1.335467  | -1.808962 |
| 5                | 0.552143                | 2.217681  | -0.345601 |
| 5                | 0.375056                | -0.293236 | 1.105699  |
| 5                | -0.276083               | -1.085524 | -0.303589 |
| 5                | -0.077678               | 1.404622  | 1.093399  |
| 5                | 0.509583                | -0.305395 | -1.718658 |
| 5                | -1.145917               | 0.099737  | 0.569763  |
| 5                | 1.494398                | 0.983677  | 0.616922  |
| 5                | -1.056963               | 0.085192  | -1.157111 |
| 5                | 1.636387                | 0.872479  | -1.113148 |
| 5                | 1.673226                | 0.920520  | 3.452812  |
| 5                | 5.115044                | 2.452026  | -2.045544 |
| 5                | 4.424254                | 0.472566  | -2.740130 |
| 5                | -1.940996               | -1.519209 | -3.265586 |
| 5                | -3.101327               | -2.389840 | 1.004021  |
| 5                | -1.468639               | -2.091657 | 2.987848  |
| 5                | -2.139881               | -3.266485 | -1.290320 |
| 5                | 3.259536                | 2.934673  | 2.316382  |
| 5                | 3.472746                | -2.485602 | -0.462053 |
| 5                | 4.503163                | 3.444758  | 0.176301  |
| 5                | 1.879314                | -3.220260 | 1.430481  |
| 6                | 1.254993                | -0.612912 | -0.216104 |
| 6                | -1.063561               | 1.455811  | -0.329487 |
| 6                | -3.523545               | 2.409071  | 0.927519  |
| 6                | 1.397267                | -3.713119 | 0.053168  |
| 6                | 2.238328                | -3.213496 | -1.058781 |
| 5                | -2.486513               | -0.582800 | 1.146338  |
| 5                | -0.365277               | 2.126666  | 2.595632  |
| 5                | -0.019868               | 3.867878  | -0.178527 |
| 5                | -2.301425               | -0.545269 | -1.854339 |
| 5                | -0.756848               | 2.197023  | -3.051959 |
| 5                | 0.750364                | -1.135611 | -3.152067 |
| 5                | -0.810486               | -2.623227 | -0.316795 |
| 5                | 0.225085                | -1.425563 | 2.267372  |
| 5                | 2.813827                | 1.032054  | 1.638035  |
| 5                | 3.254071                | 0.482439  | -1.376827 |
| 5                | 1.928774                | -1.990249 | 0.033107  |
| 5                | -2.532018               | 2.004754  | -0.362925 |
| 7                | -3.956906               | 1.243399  | -1.155810 |

|   |           |           |           |
|---|-----------|-----------|-----------|
| 7 | 3.056816  | -2.336155 | 1.105857  |
| 7 | 0.240568  | 1.278675  | 3.674803  |
| 5 | -0.845175 | 0.325458  | 3.684757  |
| 6 | -2.672777 | 2.263058  | 2.209748  |
| 6 | 1.649370  | -2.800344 | -2.426046 |
| 7 | -0.457597 | -2.025499 | -3.417808 |
| 6 | -2.022969 | 4.362815  | -0.140114 |
| 7 | 3.946896  | 3.554624  | 1.392818  |
| 7 | -2.205936 | -3.326091 | 0.252309  |
| 6 | -0.015256 | -4.071518 | -0.228977 |
| 7 | 5.177390  | 1.571073  | -3.046985 |
| 6 | -2.632967 | 2.758899  | -2.835819 |
| 6 | 0.860614  | -2.956848 | 2.619947  |
| 7 | -0.492140 | -1.179074 | 3.674902  |
| 7 | -2.786279 | -2.122070 | -2.104220 |
| 6 | -3.782067 | 0.068326  | -2.119365 |
| 6 | 3.230020  | -1.113095 | 1.956355  |
| 7 | 2.612937  | 1.925125  | 2.930484  |
| 7 | -2.767450 | -1.670499 | 2.300057  |
| 6 | -4.064070 | -0.126578 | 1.002902  |
| 6 | 4.068767  | -1.239801 | -1.136540 |
| 7 | 5.025379  | 3.296818  | -1.013797 |
| 5 | -3.609939 | 2.645238  | -1.616631 |
| 5 | -3.329243 | 3.495069  | -0.224420 |
| 6 | -3.999107 | 1.176248  | 0.329228  |
| 6 | -3.736191 | -1.206112 | -1.419184 |
| 5 | -2.752110 | 0.143246  | -3.359558 |
| 5 | 2.119638  | -0.756503 | 3.124198  |
| 6 | 3.851875  | -0.048332 | 1.307605  |
| 6 | -3.422482 | -0.279834 | 2.369517  |
| 5 | -3.964682 | -1.357041 | 0.118845  |
| 5 | 4.246394  | -0.078536 | -0.198202 |
| 6 | 3.676512  | -0.837325 | -2.529199 |
| 6 | -1.541718 | 3.095375  | 2.291164  |
| 5 | -2.477513 | 0.830548  | 2.917114  |
| 5 | 2.326286  | -1.539072 | -3.095665 |
| 6 | 0.219117  | -3.023286 | -2.667863 |
| 6 | -1.057426 | 4.416499  | -1.205302 |
| 5 | -1.146304 | 4.089258  | 1.110818  |
| 5 | -0.646902 | -3.805095 | -1.623862 |
| 6 | -0.947377 | -3.801404 | 0.847019  |
| 6 | -2.118025 | 1.605928  | -3.501741 |
| 5 | -1.362304 | 3.681346  | -2.587007 |
| 5 | -0.586676 | -3.259459 | 2.268267  |
| 6 | 1.044274  | -1.804023 | 3.535117  |

5b

| Atomic<br>Number | Coordinates (Angstroms) |   |   |
|------------------|-------------------------|---|---|
|                  | X                       | Y | Z |

---

|   |           |           |           |
|---|-----------|-----------|-----------|
| 5 | -0.233522 | 1.515718  | 0.736653  |
| 5 | 1.273976  | 1.051766  | 0.012384  |
| 5 | 0.303453  | -1.494407 | -0.738145 |
| 5 | -1.235177 | -1.017752 | -0.065347 |
| 5 | 1.593225  | -0.655358 | 0.287097  |
| 5 | -1.489229 | 0.724884  | -0.245913 |
| 5 | 0.083360  | -1.339722 | 1.088986  |
| 5 | 1.163426  | -0.044633 | -1.361433 |
| 5 | -1.096305 | 0.046388  | 1.344485  |
| 5 | -0.036438 | 1.349507  | -1.139535 |
| 5 | -1.500062 | 0.975431  | -3.352646 |
| 6 | -0.547286 | -0.251904 | -1.440625 |
| 6 | 0.625297  | 0.261217  | 1.401215  |
| 6 | 3.082667  | -0.307156 | 3.452281  |
| 6 | -2.622859 | -0.952436 | -3.081254 |
| 6 | -2.981983 | 0.395200  | -3.267459 |
| 5 | -0.600912 | -4.295306 | 1.091397  |
| 5 | 3.294474  | -1.078030 | 0.527805  |
| 5 | 2.540882  | 1.923313  | 0.502963  |
| 5 | -2.959273 | -1.302650 | 2.714981  |
| 5 | -1.500203 | 3.461702  | 1.857384  |
| 5 | -3.048749 | 1.301238  | -0.597049 |
| 5 | -2.508290 | -1.887749 | -0.593175 |
| 5 | 1.529404  | -3.441194 | -1.709311 |
| 5 | 2.937501  | 1.319205  | -2.782899 |
| 5 | 0.447317  | 4.223144  | -1.081326 |
| 5 | -0.995597 | -0.649252 | -3.061202 |
| 5 | 1.079587  | 0.626483  | 2.997995  |
| 6 | -2.809500 | -2.818488 | 2.567471  |
| 5 | -3.394180 | 1.523912  | 2.279053  |
| 5 | 3.478618  | -1.548938 | -2.282998 |
| 6 | 2.661988  | 2.833187  | -2.653596 |
| 6 | 1.562326  | -3.559414 | 2.049078  |
| 5 | -1.850637 | -3.910167 | 2.032295  |
| 5 | 1.675351  | 3.869860  | -2.060751 |
| 6 | -1.733323 | 3.459049  | -1.924135 |
| 6 | 4.440387  | -0.036128 | 0.246458  |
| 5 | 2.931611  | -2.885432 | 2.014891  |
| 5 | -3.070052 | 2.733014  | -1.666617 |
| 6 | -4.414344 | 0.183155  | -0.796731 |
| 6 | 2.677636  | 3.260206  | 1.566735  |
| 5 | 4.239935  | 1.465173  | 0.645376  |
| 5 | -4.176897 | -1.414592 | -0.884954 |
| 6 | -2.642116 | -3.278361 | -1.635082 |
| 6 | -2.959515 | 2.992583  | 2.012488  |
| 5 | 1.291647  | 3.327967  | 2.071139  |
| 5 | -1.239371 | -3.372660 | -2.088913 |
| 5 | -3.373028 | -1.994359 | -2.175995 |
| 6 | -2.864396 | -3.494680 | -0.250277 |
| 7 | -3.788281 | -2.445186 | 0.266223  |
| 7 | 1.734039  | -4.072617 | -0.285847 |
| 7 | 4.911804  | -1.257928 | -1.916304 |

|   |           |           |           |
|---|-----------|-----------|-----------|
| 5 | 0.181742  | -2.747098 | -2.322472 |
| 6 | 2.966511  | -2.927120 | -1.750927 |
| 6 | 2.948503  | -3.251715 | -0.396700 |
| 6 | 3.543304  | 2.273464  | -1.787658 |
| 5 | 2.396144  | -0.253664 | -2.773776 |
| 5 | -0.867808 | 2.272206  | -2.399765 |
| 6 | -1.140324 | 4.051993  | -0.764664 |
| 7 | 1.863129  | 4.147956  | -0.654717 |
| 7 | -3.557389 | 2.721703  | -0.346304 |
| 6 | -4.709393 | 0.692825  | 0.457989  |
| 5 | -3.802585 | 0.987449  | -2.135173 |
| 5 | 3.228893  | -1.656334 | 3.113179  |
| 6 | 4.860492  | -0.590446 | -0.895083 |
| 7 | 3.497037  | -2.592159 | 0.671367  |
| 7 | -1.983270 | -4.138857 | 0.618761  |
| 6 | 0.996232  | -4.098555 | 0.842806  |
| 5 | 0.817776  | -2.284525 | 2.365206  |
| 5 | -2.340646 | 0.235151  | 2.774579  |
| 6 | -3.599777 | -2.178384 | 1.664587  |
| 7 | -4.689382 | 1.057498  | 1.600969  |
| 7 | -1.792281 | 4.162720  | 0.453612  |
| 6 | -2.978227 | 3.385828  | 0.684187  |
| 5 | -0.128576 | 2.708997  | 2.330735  |
| 5 | 3.461886  | 1.945984  | 2.023559  |
| 6 | 2.817566  | 3.542518  | 0.173519  |
| 7 | 3.754999  | 2.553131  | -0.399975 |
| 7 | 0.076500  | -1.704322 | -3.490925 |
| 5 | 1.205069  | -0.985555 | -3.541998 |
| 6 | 2.701618  | 0.947346  | 3.009690  |
| 7 | 0.009516  | 1.635840  | 3.489346  |
| 5 | 1.518792  | -1.005802 | 3.313437  |
| 5 | -1.135303 | 0.941262  | 3.545951  |

5c

| Atomic<br>Number | Coordinates (Angstroms) |           |           |
|------------------|-------------------------|-----------|-----------|
|                  | X                       | Y         | Z         |
| 5                | 1.646583                | -0.264571 | -0.020401 |
| 5                | 0.956804                | 1.367888  | -0.217634 |
| 5                | -1.646583               | 0.264571  | 0.020401  |
| 5                | -0.956804               | -1.367888 | 0.217634  |
| 5                | -0.561522               | 1.058682  | -1.027623 |
| 5                | 0.561522                | -1.058682 | 1.027623  |
| 5                | -0.812436               | -0.584885 | -1.271339 |
| 5                | -0.541271               | 1.388776  | 0.666279  |
| 5                | 0.541271                | -1.388776 | -0.666279 |
| 5                | 0.812436                | 0.584885  | 1.271339  |
| 5                | 0.000213                | 3.877091  | 0.374915  |
| 5                | 3.799821                | -0.588102 | 1.500024  |
| 5                | 2.285989                | -3.133293 | 0.888724  |



|   |           |           |           |
|---|-----------|-----------|-----------|
| 5 | -0.000213 | -3.877091 | -0.374915 |
| 5 | -3.312554 | -1.034200 | -1.486938 |
| 5 | -3.799821 | 0.588102  | -1.500024 |
| 5 | -1.587203 | -3.714274 | -0.950017 |
| 5 | 1.587203  | 3.714274  | 0.950017  |
| 5 | 3.312554  | 1.034200  | 1.486938  |
| 5 | -2.839770 | 0.078513  | 3.509710  |
| 6 | -0.739338 | -0.104438 | 1.364539  |
| 6 | 0.739338  | 0.104438  | -1.364539 |
| 6 | 0.837919  | 1.359353  | -4.010565 |
| 6 | -0.837919 | -1.359353 | 4.010565  |
| 5 | -1.764101 | -1.086765 | -2.486516 |
| 5 | -1.161788 | 2.152406  | -1.998974 |
| 5 | 1.331829  | 3.108728  | -0.509982 |
| 5 | 0.963733  | -2.754436 | -1.441276 |
| 5 | 3.389442  | -0.084941 | 0.046568  |
| 5 | 1.161788  | -2.152406 | 1.998974  |
| 5 | -1.331829 | -3.108728 | 0.509982  |
| 5 | -3.389442 | 0.084941  | -0.046568 |
| 5 | -0.963733 | 2.754436  | 1.441276  |
| 5 | 1.764101  | 1.086765  | 2.486516  |
| 5 | -1.291896 | -0.294432 | 2.782714  |
| 5 | 1.291896  | 0.294432  | -2.782714 |
| 7 | 1.565253  | -0.893055 | -3.871515 |
| 7 | -1.565253 | 0.893055  | 3.871515  |
| 5 | -2.285989 | 3.133293  | -0.888724 |
| 6 | -0.210872 | 2.296149  | -3.518825 |
| 6 | 0.210872  | -2.296149 | 3.518825  |
| 6 | 2.542169  | 2.369349  | -2.368431 |
| 6 | -2.542169 | -2.369349 | 2.368431  |
| 6 | 3.501666  | -0.552926 | -2.206071 |
| 6 | -3.501666 | 0.552926  | 2.206071  |
| 6 | 1.296933  | -2.183998 | -3.272264 |
| 6 | -1.296933 | 2.183998  | 3.272264  |
| 6 | -0.921121 | -0.482544 | -4.060892 |
| 6 | 0.921121  | 0.482544  | 4.060892  |
| 5 | 2.839770  | -0.078513 | -3.509710 |
| 5 | 2.315954  | 1.471483  | -3.603206 |
| 6 | 0.433320  | -0.020025 | -4.206099 |
| 6 | -0.027970 | -2.668215 | -3.173868 |
| 6 | 0.027970  | 2.668215  | 3.173868  |
| 6 | -1.914315 | 0.462658  | -3.684366 |
| 6 | 1.914315  | -0.462658 | 3.684366  |
| 6 | 0.134446  | 3.289133  | -2.520975 |
| 6 | -0.134446 | -3.289133 | 2.520975  |
| 6 | 3.262466  | 1.849962  | -1.280975 |
| 6 | -3.262466 | -1.849962 | 1.280975  |
| 6 | 3.192949  | -1.801581 | -1.619046 |
| 6 | -3.192949 | 1.801581  | 1.619046  |
| 7 | -1.488195 | -3.245751 | 1.965858  |
| 5 | -2.735287 | -2.218241 | -0.199507 |
| 5 | -3.136951 | 1.910775  | 0.021853  |

|   |           |           |           |
|---|-----------|-----------|-----------|
| 7 | -3.780810 | -0.479033 | 1.267174  |
| 7 | -2.217350 | 2.672090  | 2.314112  |
| 5 | 0.438004  | 3.678138  | 2.014282  |
| 5 | 3.152626  | -0.009613 | 2.804296  |
| 7 | 1.171575  | 1.844302  | 3.657883  |
| 7 | 1.573185  | -1.889465 | 3.479011  |
| 5 | 0.928021  | -3.810025 | 1.380567  |
| 5 | 2.735287  | 2.218241  | 0.199507  |
| 7 | 1.488195  | 3.245751  | -1.965858 |
| 7 | -1.573185 | 1.889465  | -3.479011 |
| 5 | -0.928021 | 3.810025  | -1.380567 |
| 5 | -3.152626 | 0.009613  | -2.804296 |
| 7 | -1.171575 | -1.844302 | -3.657883 |
| 7 | 2.217350  | -2.672090 | -2.314112 |
| 5 | -0.438004 | -3.678138 | -2.014282 |
| 5 | 3.136951  | -1.910775 | -0.021853 |
| 7 | 3.780810  | 0.479033  | -1.267174 |
| 6 | -0.433320 | 0.020025  | 4.206099  |
| 5 | -2.315954 | -1.471483 | 3.603206  |

5e

| Atomic<br>Number | Coordinates (Angstroms) |           |           |
|------------------|-------------------------|-----------|-----------|
|                  | X                       | Y         | Z         |
| 5                | -0.141612               | 1.241528  | 0.871599  |
| 5                | 1.241580                | 0.772512  | 0.178493  |
| 5                | 0.141612                | -1.241528 | -0.871599 |
| 5                | -1.241580               | -0.772512 | -0.178493 |
| 5                | 1.287179                | -0.807335 | 0.140009  |
| 5                | -1.287179               | 0.807335  | -0.140009 |
| 5                | -0.088405               | -1.318139 | 0.836593  |
| 5                | 1.066611                | 0.073204  | -1.364549 |
| 5                | -1.066611               | -0.073204 | 1.364549  |
| 5                | 0.088405                | 1.318139  | -0.836593 |
| 5                | -3.282472               | 1.805230  | -2.021335 |
| 5                | 0.910945                | -2.751693 | 3.219694  |
| 5                | 3.282472                | -1.805230 | 2.021335  |
| 5                | 0.392834                | 2.815363  | 3.068052  |
| 5                | -0.910945               | 2.751693  | -3.219694 |
| 5                | -1.215607               | -0.226750 | 3.934462  |
| 5                | -3.296254               | -1.428186 | -1.987432 |
| 5                | -0.392834               | -2.815363 | -3.068052 |
| 5                | 3.296254                | 1.428186  | 1.987432  |
| 5                | 1.215607                | 0.226750  | -3.934462 |
| 5                | 0.440597                | -0.144969 | 4.284400  |
| 5                | 1.251247                | 1.295036  | 3.830900  |
| 5                | -1.251247               | -1.295036 | -3.830900 |

|   |           |           |           |
|---|-----------|-----------|-----------|
| 5 | -0.440597 | 0.144969  | -4.284400 |
| 6 | -0.592405 | 0.028612  | -1.394858 |
| 6 | 0.592405  | -0.028612 | 1.394858  |
| 6 | 2.583365  | -0.937398 | 3.166917  |
| 6 | -2.947984 | -2.757477 | 0.257637  |
| 6 | 2.947984  | 2.757477  | -0.257637 |
| 6 | -3.579725 | 1.949066  | 0.533925  |
| 6 | 3.579725  | -1.949066 | -0.533925 |
| 6 | -0.466029 | -3.846766 | 0.851558  |
| 6 | 0.466029  | 3.846766  | -0.851558 |
| 6 | 1.400057  | -3.649596 | -1.142881 |
| 6 | -1.400057 | 3.649596  | 1.142881  |
| 6 | -3.234414 | -0.311535 | 1.745850  |
| 6 | 3.234414  | 0.311535  | -1.745850 |
| 5 | 0.154025  | -2.587642 | -1.497599 |
| 5 | -2.524438 | -1.425019 | -0.499518 |
| 5 | -2.411573 | 1.700961  | -0.564305 |
| 5 | 0.256551  | 2.482984  | -1.842726 |
| 5 | 2.041437  | -1.070777 | -3.707621 |
| 5 | -0.154025 | 2.587642  | 1.497599  |
| 5 | 2.524438  | 1.425019  | 0.499518  |
| 5 | 2.411573  | -1.700961 | 0.564305  |
| 5 | -0.256551 | -2.482984 | 1.842726  |
| 5 | -2.041437 | 1.070777  | 3.707621  |
| 5 | 1.224073  | -0.066393 | 2.748639  |
| 5 | -1.224073 | 0.066393  | -2.748639 |
| 7 | -1.081888 | -3.518785 | -1.752067 |
| 5 | 1.391538  | -3.025466 | -2.573434 |
| 6 | -0.042745 | -3.885388 | -0.611803 |
| 6 | -3.647837 | -1.270880 | 0.583495  |
| 7 | -3.915335 | -0.633375 | -0.745655 |
| 5 | -2.617717 | -2.897248 | -1.293919 |
| 7 | -2.600805 | -0.619707 | -3.126081 |
| 6 | -2.583365 | 0.937398  | -3.166917 |
| 6 | -1.361800 | 1.367085  | -3.823095 |
| 7 | 2.600805  | 0.619707  | 3.126081  |
| 6 | 1.361800  | -1.367085 | 3.823095  |
| 7 | 1.081888  | 3.518785  | 1.752067  |
| 5 | -1.391538 | 3.025466  | 2.573434  |
| 6 | 0.042745  | 3.885388  | 0.611803  |
| 7 | 3.915335  | 0.633375  | 0.745655  |
| 5 | 2.617717  | 2.897248  | 1.293919  |
| 6 | 3.647837  | 1.270880  | -0.583495 |
| 7 | -2.395703 | 3.081378  | -1.294805 |
| 5 | -3.980543 | 1.076959  | -0.747316 |
| 6 | -2.590987 | 3.097400  | 0.198968  |
| 6 | 2.590987  | -3.097400 | -0.198968 |
| 5 | 3.980543  | -1.076959 | 0.747316  |
| 7 | 2.395703  | -3.081378 | 1.294805  |
| 7 | 1.684573  | 2.536526  | -2.411603 |
| 5 | -0.918368 | 3.692916  | -1.923049 |
| 6 | 1.827335  | 3.215570  | -1.240198 |

|   |           |           |           |
|---|-----------|-----------|-----------|
| 6 | -1.827335 | -3.215570 | 1.240198  |
| 5 | 0.918368  | -3.692916 | 1.923049  |
| 7 | -1.684573 | -2.536526 | 2.411603  |
| 7 | 2.565839  | -1.880674 | -2.761087 |
| 5 | 2.114249  | 1.009698  | -2.680148 |
| 6 | 3.313578  | -1.156091 | -1.750959 |
| 6 | -3.313578 | 1.156091  | 1.750959  |
| 5 | -2.114249 | -1.009698 | 2.680148  |
| 7 | -2.565839 | 1.880674  | 2.761087  |

CBN clusters from pentagonal pyramid isomer VI

6a

| Atomic<br>Number | Coordinates (Angstroms) |           |           |
|------------------|-------------------------|-----------|-----------|
|                  | X                       | Y         | Z         |
| 5                | -0.104623               | 1.291748  | 0.784732  |
| 5                | 1.273783                | 0.767070  | 0.230001  |
| 5                | 0.104623                | -1.291748 | -0.784732 |
| 5                | -1.273783               | -0.767070 | -0.230001 |
| 5                | 1.242900                | -0.814227 | 0.238703  |
| 5                | -1.242900               | 0.814227  | -0.238703 |
| 5                | -0.156095               | -1.277787 | 0.798792  |
| 5                | 0.985101                | -0.023869 | -1.122920 |
| 5                | -0.985101               | 0.023869  | 1.122920  |
| 5                | 0.156095                | 1.277787  | -0.798792 |
| 5                | 1.025820                | -1.322717 | 3.840683  |
| 5                | 1.163126                | 1.348163  | 3.792352  |
| 5                | -1.025820               | 1.322717  | -3.840683 |
| 5                | -1.163126               | -1.348163 | -3.792352 |
| 6                | -0.548422               | 0.003206  | -1.380226 |
| 6                | 0.548422                | -0.003206 | 1.380226  |
| 6                | 2.399440                | -0.851517 | 3.233559  |
| 6                | 2.481244                | 0.716165  | 3.201735  |
| 6                | -2.481244               | -0.716165 | -3.201735 |
| 6                | -2.399440               | 0.851517  | -3.233559 |
| 5                | -0.377081               | -2.481978 | 1.616112  |
| 5                | 2.402455                | -1.677864 | 0.491495  |
| 5                | 2.560765                | 1.439779  | 0.438508  |
| 5                | -1.943694               | 0.140599  | 2.221627  |
| 5                | -0.122692               | 2.568282  | 1.518488  |
| 5                | -2.402455               | 1.677864  | -0.491495 |
| 5                | -2.560765               | -1.439779 | -0.438508 |
| 5                | 0.122692                | -2.568282 | -1.518488 |
| 5                | 1.943694                | -0.140599 | -2.221627 |
| 5                | 0.377081                | 2.481978  | -1.616112 |
| 5                | -1.119445               | 0.007700  | -2.724707 |
| 5                | 1.119445                | -0.007700 | 2.724707  |
| 7                | 0.221515                | 0.064502  | 4.030697  |

|   |           |           |           |
|---|-----------|-----------|-----------|
| 7 | -0.221515 | -0.064502 | -4.030697 |
| 6 | 2.311986  | -3.029637 | 1.344450  |
| 6 | -2.311986 | 3.029637  | -1.344450 |
| 6 | 3.913155  | 0.634775  | 0.707099  |
| 6 | -3.913155 | -0.634775 | -0.707099 |
| 6 | 1.169769  | 3.454899  | 1.788021  |
| 6 | -1.169769 | -3.454899 | -1.788021 |
| 6 | -2.062739 | 1.475367  | 3.105309  |
| 6 | 2.062739  | -1.475367 | -3.105309 |
| 6 | -1.420641 | -2.555413 | 2.811526  |
| 6 | 1.420641  | 2.555413  | -2.811526 |
| 7 | -2.223793 | -1.101748 | 3.145897  |
| 5 | -1.327474 | 0.192638  | 3.766591  |
| 5 | -3.432190 | -0.568513 | 2.084048  |
| 6 | -3.266243 | 1.041350  | 2.161977  |
| 6 | 0.091592  | 3.993526  | 0.782792  |
| 5 | 0.489755  | 2.777780  | 3.072337  |
| 5 | -1.407569 | 3.608538  | 1.248735  |
| 7 | -1.146556 | 2.803266  | 2.673134  |
| 7 | 2.623339  | 2.813661  | 1.196209  |
| 6 | 3.737608  | 1.421880  | -0.658503 |
| 5 | 3.275066  | 1.422358  | 1.956128  |
| 5 | 2.914525  | 2.803029  | -0.440643 |
| 5 | 3.045546  | -1.767356 | 2.039895  |
| 5 | 3.528188  | -1.879600 | -0.713535 |
| 7 | 3.815354  | -1.038970 | 0.710772  |
| 6 | 2.612908  | -3.110808 | -0.204560 |
| 6 | -1.742662 | -3.349900 | 1.496576  |
| 5 | 0.120860  | -2.666236 | 3.213069  |
| 5 | -0.393257 | -3.969073 | 0.849014  |
| 7 | 0.779336  | -3.492628 | 1.895959  |
| 7 | 2.223793  | 1.101748  | -3.145897 |
| 6 | 3.266243  | -1.041350 | -2.161977 |
| 5 | 3.432190  | 0.568513  | -2.084048 |
| 5 | 1.327474  | -0.192638 | -3.766591 |
| 5 | 0.393257  | 3.969073  | -0.849014 |
| 6 | 1.742662  | 3.349900  | -1.496576 |
| 5 | -0.120860 | 2.666236  | -3.213069 |
| 7 | -0.779336 | 3.492628  | -1.895959 |
| 7 | -3.815354 | 1.038970  | -0.710772 |
| 5 | -3.045546 | 1.767356  | -2.039895 |
| 5 | -3.528188 | 1.879600  | 0.713535  |
| 6 | -2.612908 | 3.110808  | 0.204560  |
| 6 | -3.737608 | -1.421880 | 0.658503  |
| 5 | -2.914525 | -2.803029 | 0.440643  |
| 5 | -3.275066 | -1.422358 | -1.956128 |
| 7 | -2.623339 | -2.813661 | -1.196209 |
| 7 | 1.146556  | -2.803266 | -2.673134 |
| 5 | 1.407569  | -3.608538 | -1.248735 |
| 5 | -0.489755 | -2.777780 | -3.072337 |
| 6 | -0.091592 | -3.993526 | -0.782792 |

6c

| Atomic<br>Number | Coordinates (Angstroms) |           |           |
|------------------|-------------------------|-----------|-----------|
|                  | X                       | Y         | Z         |
| 5                | -0.081923               | 1.311632  | 0.765200  |
| 5                | 1.295236                | 0.746512  | 0.209394  |
| 5                | 0.081923                | -1.311632 | -0.765200 |
| 5                | -1.295236               | -0.746512 | -0.209394 |
| 5                | 1.227624                | -0.845775 | 0.232648  |
| 5                | -1.227624               | 0.845775  | -0.232648 |
| 5                | -0.190849               | -1.276926 | 0.802935  |
| 5                | 0.995775                | -0.057406 | -1.118583 |
| 5                | -0.995775               | 0.057406  | 1.118583  |
| 5                | 0.190849                | 1.276926  | -0.802935 |
| 5                | 3.298633                | -1.103363 | -2.041150 |
| 5                | 0.115902                | 3.999386  | 0.661746  |
| 5                | -2.520866               | 3.149426  | 0.290592  |
| 5                | -3.298633               | 1.103363  | 2.041150  |
| 5                | -1.832434               | -3.324109 | 1.414595  |
| 5                | -0.115902               | -3.999386 | -0.661746 |
| 5                | -3.722851               | -1.372623 | 0.767157  |
| 5                | 3.722851                | 1.372623  | -0.767157 |
| 5                | 0.930906                | -1.369757 | 3.664006  |
| 5                | 1.117178                | 1.414051  | 3.598227  |
| 5                | -0.930906               | 1.369757  | -3.664006 |
| 5                | 1.832434                | 3.324109  | -1.414595 |
| 5                | -1.117178               | -1.414051 | -3.598227 |
| 6                | -0.529368               | 0.002336  | -1.334510 |
| 6                | 0.529368                | -0.002336 | 1.334510  |
| 6                | 2.349054                | -0.892961 | 3.067627  |
| 6                | 2.457756                | 0.723512  | 3.030455  |
| 6                | -2.457756               | -0.723512 | -3.030455 |
| 6                | -2.349054               | 0.892961  | -3.067627 |
| 5                | -0.401087               | -2.485726 | 1.624102  |
| 5                | 2.400455                | -1.691322 | 0.489303  |
| 5                | 2.573719                | 1.436951  | 0.427140  |
| 5                | -1.955054               | 0.157473  | 2.220735  |
| 5                | -0.099068               | 2.582710  | 1.515324  |
| 5                | -2.400455               | 1.691322  | -0.489303 |
| 5                | -2.573719               | -1.436951 | -0.427140 |
| 5                | 0.099068                | -2.582710 | -1.515324 |
| 5                | 1.955054                | -0.157473 | -2.220735 |
| 5                | 0.401087                | 2.485726  | -1.624102 |
| 5                | -1.076984               | 0.004656  | -2.649713 |
| 5                | 1.076984                | -0.004656 | 2.649713  |
| 7                | 0.148343                | 0.088541  | 3.914931  |
| 7                | -0.148343               | -0.088541 | -3.914931 |
| 7                | 3.509139                | -1.869934 | -0.626401 |
| 5                | 3.887503                | -0.977937 | 0.763443  |
| 5                | 2.520866                | -3.149426 | -0.290592 |

|   |           |           |           |
|---|-----------|-----------|-----------|
| 6 | 2.352536  | -3.077710 | 1.301748  |
| 6 | 3.099721  | -1.770794 | 1.906668  |
| 6 | -3.099721 | 1.770794  | -1.906668 |
| 6 | -2.352536 | 3.077710  | -1.301748 |
| 7 | -3.509139 | 1.869934  | 0.626401  |
| 5 | -3.887503 | 0.977937  | -0.763443 |
| 5 | 2.618465  | 2.876198  | 1.286768  |
| 6 | 3.968914  | 0.678757  | 0.657061  |
| 6 | 3.272309  | 1.513091  | 1.844345  |
| 7 | 2.923054  | 2.755419  | -0.369512 |
| 7 | -2.923054 | -2.755419 | 0.369512  |
| 6 | -3.272309 | -1.513091 | -1.844345 |
| 6 | -3.968914 | -0.678757 | -0.657061 |
| 5 | -2.618465 | -2.876198 | -1.286768 |
| 7 | -1.336337 | 3.573102  | 1.304603  |
| 5 | -1.169113 | 2.795137  | 2.774323  |
| 6 | 1.162650  | 3.534979  | 1.772796  |
| 6 | 0.411213  | 2.812147  | 2.996948  |
| 6 | -0.411213 | -2.812147 | -2.996948 |
| 6 | -1.162650 | -3.534979 | -1.772796 |
| 7 | 1.336337  | -3.573102 | -1.304603 |
| 5 | 1.169113  | -2.795137 | -2.774323 |
| 5 | -2.214764 | -1.189779 | 3.190538  |
| 7 | -3.361658 | -0.550082 | 2.136547  |
| 6 | -2.153506 | 1.481674  | 3.107716  |
| 6 | -1.490613 | 0.150070  | 3.724186  |
| 6 | 1.490613  | -0.150070 | -3.724186 |
| 6 | 2.153506  | -1.481674 | -3.107716 |
| 5 | 2.214764  | 1.189779  | -3.190538 |
| 7 | 3.361658  | 0.550082  | -2.136547 |
| 7 | -0.386335 | -3.913117 | 0.912433  |
| 5 | 0.872220  | -3.517639 | 1.952605  |
| 6 | -1.470430 | -2.622680 | 2.804425  |
| 6 | 0.106910  | -2.719506 | 3.105189  |
| 6 | -0.106910 | 2.719506  | -3.105189 |
| 6 | 1.470430  | 2.622680  | -2.804425 |
| 5 | -0.872220 | 3.517639  | -1.952605 |
| 7 | 0.386335  | 3.913117  | -0.912433 |

CBN clusters from pentagonal pyramid isomer VII

7b

| Atomic<br>Number | Coordinates (Angstroms) |           |           |
|------------------|-------------------------|-----------|-----------|
|                  | X                       | Y         | Z         |
| 5                | -1.288556               | -0.151942 | -1.085303 |
| 5                | -1.162081               | 1.186783  | -0.003622 |
| 5                | 1.290145                | 0.223460  | 0.914936  |
| 5                | 1.226047                | -1.150034 | -0.124701 |

|   |           |           |           |
|---|-----------|-----------|-----------|
| 5 | -0.304336 | 0.717937  | 1.479011  |
| 5 | 0.304678  | -0.733285 | -1.529791 |
| 5 | 0.108514  | -0.967582 | 1.251659  |
| 5 | 0.488851  | 1.539482  | 0.224408  |
| 5 | -0.498791 | -1.522950 | -0.225730 |
| 5 | -0.034457 | 0.955757  | -1.414376 |
| 5 | 2.651964  | 2.108189  | -2.650983 |
| 5 | 3.985871  | 1.668870  | -0.524776 |
| 6 | 1.339673  | 0.400574  | -0.720089 |
| 6 | -1.310588 | -0.344083 | 0.617246  |
| 6 | 4.183588  | 0.472768  | -1.496792 |
| 6 | 3.339422  | 0.685145  | -2.767380 |
| 5 | 0.266177  | -1.901491 | 2.613661  |
| 5 | -0.871760 | 1.270284  | 3.032942  |
| 5 | -2.409020 | 2.248728  | 0.058128  |
| 5 | -0.901639 | -3.101739 | -0.051607 |
| 5 | -2.582722 | 0.060209  | -2.194496 |
| 5 | 0.850419  | -1.756185 | -2.936975 |
| 5 | 2.504156  | -2.251347 | -0.131962 |
| 5 | 2.670899  | 0.123070  | 1.748019  |
| 5 | 0.978581  | 3.007060  | 0.575599  |
| 5 | -0.769171 | 2.205922  | -3.042764 |
| 5 | 2.614389  | 0.935140  | -1.339168 |
| 5 | -2.686231 | -0.662465 | 1.209705  |
| 7 | -3.422634 | -2.076682 | 1.142053  |
| 7 | 3.057849  | 2.589162  | -1.267017 |
| 6 | -3.144964 | -1.529234 | 2.534550  |
| 6 | -4.086207 | -1.012952 | 0.361907  |
| 5 | -3.651715 | -0.073763 | 2.689353  |
| 5 | -4.204099 | 0.297916  | 1.147409  |
| 5 | -0.186130 | -3.811629 | 1.641485  |
| 5 | -2.421129 | -3.186077 | -1.313256 |
| 5 | -3.902932 | 1.123722  | -1.301784 |
| 5 | -2.302836 | 3.188616  | 1.726280  |
| 5 | -0.096135 | 0.058474  | 3.925290  |
| 5 | -0.009151 | -0.475088 | -3.452757 |
| 5 | 2.069279  | -3.054999 | -2.063868 |
| 5 | 3.923662  | -1.189851 | 1.571902  |
| 5 | 2.800128  | 2.925145  | 1.362041  |
| 5 | 0.019690  | 3.622920  | -1.968680 |
| 7 | -2.496415 | -1.279579 | -2.996623 |
| 6 | -3.204026 | -2.013492 | -1.983030 |
| 6 | -2.969029 | 1.590968  | -2.384558 |
| 5 | -3.876226 | -0.914649 | -1.179348 |
| 5 | 4.356041  | 0.456962  | 1.601544  |
| 6 | 3.840887  | 1.736673  | 1.084178  |
| 7 | 2.459708  | -0.270567 | 3.180158  |
| 6 | 2.740958  | -1.555216 | 2.570110  |
| 6 | -0.997031 | -3.492857 | -2.029358 |
| 6 | -1.529088 | -3.861954 | 1.294079  |
| 7 | -0.090700 | -3.942104 | -1.090795 |
| 5 | -2.629025 | -3.301289 | 0.443714  |



|   |           |           |           |
|---|-----------|-----------|-----------|
| 5 | 2.283275  | 3.574869  | -0.331932 |
| 6 | 0.866763  | 4.085751  | -0.711622 |
| 6 | 2.219605  | 2.578349  | 2.716667  |
| 7 | 0.035248  | 4.159873  | 0.563683  |
| 7 | 1.703071  | -2.530100 | 2.520695  |
| 6 | 1.312300  | -3.496977 | 1.521554  |
| 6 | -0.597763 | -1.409663 | 3.832334  |
| 5 | -1.884254 | -1.744793 | 3.356985  |
| 5 | 0.993064  | 2.290810  | -2.981810 |
| 6 | 0.092304  | 1.074781  | -3.268459 |
| 6 | -1.500630 | 3.599793  | -1.779761 |
| 7 | -2.076561 | 2.615767  | -2.662391 |
| 7 | 1.742100  | 1.814076  | 3.532690  |
| 6 | 1.454621  | 0.466913  | 3.759701  |
| 6 | -2.000965 | 2.294011  | 2.990977  |
| 5 | -2.901631 | 1.245709  | 3.341317  |
| 5 | 2.857782  | -0.725479 | -3.230139 |
| 6 | 2.488920  | -2.066916 | -3.000024 |
| 6 | -1.266370 | -1.518617 | -3.413750 |
| 7 | -0.518746 | -2.675047 | -3.079077 |
| 7 | -2.065160 | 3.660360  | -0.546400 |
| 6 | -1.347534 | 3.888568  | 0.631339  |
| 6 | -4.121465 | 1.625296  | 0.157066  |
| 5 | -3.753978 | 2.747592  | 1.014866  |
| 5 | 4.401582  | -0.873879 | -0.837300 |
| 6 | 3.992088  | -1.793574 | 0.117255  |
| 6 | 1.311590  | -3.801613 | -1.004069 |
| 7 | 1.925344  | -3.605186 | 0.296443  |

7c

| Atomic<br>Number | Coordinates (Angstroms) |           |           |
|------------------|-------------------------|-----------|-----------|
|                  | X                       | Y         | Z         |
| 5                | -1.358622               | 0.979119  | -0.805025 |
| 5                | -1.055535               | -0.616088 | -1.534903 |
| 5                | 0.973662                | -1.088663 | 0.311558  |
| 5                | 0.726477                | 0.484903  | 1.003497  |
| 5                | 0.619506                | -0.975629 | -1.379394 |
| 5                | -0.955514               | 0.838627  | 0.863115  |
| 5                | 1.481234                | 0.349834  | -0.529643 |
| 5                | -0.524313               | -1.743423 | -0.338899 |
| 5                | 0.219109                | 1.582142  | -0.279775 |
| 5                | -1.781240               | -0.494386 | 0.089094  |
| 6                | -0.419645               | -0.767653 | 1.036855  |
| 6                | 0.144124                | 0.597888  | -1.632644 |
| 5                | 3.178955                | 0.599350  | -0.677472 |
| 5                | 1.662082                | -1.637425 | -2.469200 |
| 5                | -1.801016               | -0.999574 | -2.993489 |
| 5                | 0.645139                | 3.218677  | -0.408234 |

|   |           |           |           |
|---|-----------|-----------|-----------|
| 5 | -2.804548 | 1.887197  | -0.968837 |
| 5 | -1.623786 | 1.551530  | 2.206753  |
| 5 | 1.546729  | 0.787605  | 2.390478  |
| 5 | 2.148494  | -2.002134 | 0.930962  |
| 5 | -0.857112 | -3.489399 | 0.015663  |
| 5 | -3.250597 | -0.977495 | 0.859000  |
| 5 | -0.680147 | -1.447170 | 2.356445  |
| 5 | 0.460007  | 1.023785  | -3.151056 |
| 7 | 1.961799  | 2.851027  | -2.403047 |
| 7 | -1.677072 | -2.505130 | 2.511354  |
| 6 | 2.841483  | 1.876274  | -2.539868 |
| 6 | -1.559991 | 2.879197  | -3.012617 |
| 5 | 2.187832  | 0.601621  | -3.247566 |
| 5 | -1.215774 | 1.408607  | -3.535699 |
| 6 | -1.660026 | 4.199517  | -0.822182 |
| 6 | 1.684681  | -3.703221 | 1.021921  |
| 6 | 2.725987  | 3.206813  | -0.050398 |
| 6 | -3.048236 | -3.113022 | 0.384610  |
| 6 | 4.066152  | -1.057388 | -0.944509 |
| 6 | -3.799744 | 0.534747  | 2.196206  |
| 6 | -0.093937 | -3.077796 | -3.350415 |
| 6 | -0.215422 | 2.168173  | 3.461598  |
| 6 | -3.474839 | 0.196397  | -2.855337 |
| 6 | 3.053677  | -0.322485 | 2.626538  |
| 7 | -2.217050 | 0.350170  | -3.551543 |
| 6 | -1.219240 | -2.469548 | -3.406255 |
| 5 | -2.535147 | -2.621465 | -2.480872 |
| 5 | -3.692511 | -1.291662 | -2.545430 |
| 5 | 2.649148  | -2.976525 | -1.880279 |
| 5 | 1.181259  | -3.344897 | -2.678215 |
| 6 | 3.383982  | -1.605790 | -2.122959 |
| 7 | 2.655559  | -0.783986 | -3.110522 |
| 7 | 3.835979  | 1.637354  | -1.605868 |
| 6 | 3.789026  | 2.218629  | -0.276423 |
| 5 | 4.354725  | 1.229295  | 0.732133  |
| 5 | 4.789619  | -0.069215 | -0.215644 |
| 5 | 1.880916  | 3.471623  | 1.245590  |
| 5 | 0.200589  | 3.997388  | 1.300892  |
| 6 | -0.467232 | 4.211878  | -0.105959 |
| 7 | 1.948359  | 3.486916  | -1.138519 |
| 7 | -1.521178 | 3.684279  | -2.154087 |
| 6 | -3.855169 | 1.181407  | -1.846264 |
| 5 | -4.526416 | 1.382577  | -0.599785 |
| 5 | -2.532259 | 3.292595  | 0.058704  |
| 5 | 2.877302  | -3.316088 | 0.049743  |
| 5 | 3.817180  | -1.966597 | 0.412090  |
| 7 | 1.406437  | -3.468972 | 2.377762  |
| 6 | 3.291269  | -1.420349 | 1.727196  |
| 6 | 0.617386  | -4.031289 | 0.049422  |
| 7 | -1.995582 | -3.191046 | 1.273297  |
| 5 | -2.208821 | -3.463987 | -0.958050 |
| 5 | 1.450604  | -4.017122 | -1.209090 |

|   |           |           |           |
|---|-----------|-----------|-----------|
| 5 | -4.396717 | 1.271554  | 1.020343  |
| 5 | -4.280833 | -1.816732 | -1.146761 |
| 7 | -3.253746 | -0.713196 | 2.359610  |
| 6 | -4.074825 | -2.135546 | 0.240375  |
| 6 | -3.434515 | 1.872580  | 2.076787  |
| 7 | -1.051418 | 1.031961  | 3.486266  |
| 5 | -0.817243 | 3.254808  | 2.469102  |
| 5 | -2.411561 | 3.038949  | 1.775031  |
| 5 | 3.534731  | 1.115343  | 2.227445  |
| 5 | 2.418709  | 2.399201  | 2.623989  |
| 7 | 1.772086  | -0.368967 | 3.310075  |
| 6 | 1.184854  | 2.165164  | 3.308823  |
| 6 | -2.186804 | -1.236147 | 3.077499  |
| 6 | 1.023639  | -2.792160 | 3.283862  |
| 5 | -0.957236 | -0.441117 | 3.729700  |
| 5 | 0.697137  | -1.275633 | 3.634267  |

7d

| Atomic<br>Number | Coordinates (Angstroms) |           |           |
|------------------|-------------------------|-----------|-----------|
|                  | X                       | Y         | Z         |
| 5                | 0.706304                | -1.062279 | 0.765620  |
| 5                | 1.011881                | 0.610714  | 1.187832  |
| 5                | -0.639601               | 1.506518  | -0.915877 |
| 5                | -0.905501               | -0.203877 | -1.263570 |
| 5                | 0.940122                | 1.728811  | -0.196456 |
| 5                | -0.851312               | -1.281190 | 0.122996  |
| 5                | 0.655944                | 0.573237  | -1.561605 |
| 5                | -0.464083               | 1.552729  | 0.836101  |
| 5                | 0.493483                | -1.054181 | -0.978420 |
| 5                | -0.565559               | -0.117855 | 1.445419  |
| 5                | -2.658359               | 4.392476  | 0.188429  |
| 5                | 1.788422                | -1.835572 | 3.225524  |
| 5                | -2.021615               | -2.649062 | 1.988691  |
| 5                | 0.822790                | -4.051596 | 1.855660  |
| 5                | 2.660157                | -2.931330 | -0.865225 |
| 5                | 2.779991                | 3.054394  | -1.906938 |
| 5                | -3.286583               | 0.712291  | -2.608486 |
| 5                | -1.001468               | 3.865304  | -1.751379 |
| 5                | 1.087265                | -3.746051 | -0.971902 |
| 5                | -0.622085               | -0.871196 | -4.209394 |
| 5                | -2.501523               | -2.912328 | -1.431253 |
| 5                | -1.803176               | 1.418666  | -3.202087 |
| 5                | -1.068376               | -3.208265 | -2.461243 |
| 5                | -2.227596               | 0.615209  | 3.189007  |
| 5                | 1.656535                | 2.805660  | 2.835743  |
| 5                | 3.019823                | 2.607329  | 1.741071  |
| 5                | -3.595935               | 3.007332  | 0.492863  |
| 5                | 4.337830                | -0.873627 | -1.377979 |
| 5                | 4.610282                | -0.773639 | 0.257570  |

|   |           |           |           |
|---|-----------|-----------|-----------|
| 5 | 2.301561  | -0.182608 | -3.355430 |
| 5 | 3.224408  | -1.119673 | 2.542850  |
| 5 | 0.713391  | 0.638202  | 4.293922  |
| 5 | -4.632494 | 0.310044  | -0.372998 |
| 5 | -4.464014 | 0.617379  | 1.273550  |
| 6 | -1.539642 | 0.379441  | 0.130240  |
| 6 | 1.603405  | -0.082500 | -0.238337 |
| 6 | 4.448183  | 0.758669  | 0.610216  |
| 6 | -4.188941 | -1.174654 | -0.557655 |
| 6 | -0.501855 | -1.991867 | -3.313693 |
| 6 | 0.865086  | 2.091372  | 3.925920  |
| 6 | 0.329787  | -3.693004 | 0.489376  |
| 6 | -1.854575 | 4.685914  | -0.909603 |
| 6 | -0.730169 | 0.558767  | -3.893388 |
| 6 | 0.797090  | -0.633580 | 3.702861  |
| 6 | -1.318186 | 2.485660  | -2.091573 |
| 6 | 1.371916  | -3.210739 | 2.812619  |
| 6 | 0.069624  | -4.006986 | -1.968094 |
| 6 | 0.128754  | 2.810859  | 3.003603  |
| 5 | -1.555259 | -0.593454 | -2.713378 |
| 5 | -1.140339 | -3.000535 | 0.580366  |
| 5 | -0.865785 | -0.459689 | 3.108995  |
| 5 | -1.129370 | 2.325773  | 2.207455  |
| 5 | -2.576179 | 3.294701  | -1.347633 |
| 5 | 1.816166  | 0.354853  | 2.648786  |
| 5 | 1.921777  | 3.098006  | -0.496126 |
| 5 | 0.822882  | 0.620697  | -3.282662 |
| 5 | 0.896123  | -1.852512 | -2.411686 |
| 5 | 1.416874  | -2.522895 | 1.299067  |
| 5 | 2.923379  | -0.999840 | -0.280883 |
| 5 | -3.044861 | 0.751857  | 0.268505  |
| 6 | -4.001711 | -0.744526 | 1.797992  |
| 7 | -4.009512 | -1.786681 | 0.746539  |
| 7 | 4.297528  | 1.478441  | -0.632933 |
| 6 | 4.180193  | 0.624354  | -1.791006 |
| 7 | -2.568035 | -3.494365 | -0.099623 |
| 6 | -3.196208 | -2.852634 | 0.933260  |
| 6 | 3.708113  | 2.712711  | -0.680660 |
| 7 | 3.092164  | 3.261110  | 0.449112  |
| 7 | -2.022318 | -1.643072 | 3.002252  |
| 6 | -3.033911 | -0.725015 | 2.814157  |
| 6 | 3.307295  | 0.958444  | -2.846486 |
| 7 | 2.630000  | 2.142834  | -2.949396 |
| 7 | -2.504826 | 1.893337  | 2.568819  |
| 6 | -3.528850 | 1.855858  | 1.513411  |
| 6 | 3.266840  | -1.881939 | -1.849878 |
| 7 | 2.305905  | -1.553291 | -2.868573 |
| 7 | -3.787896 | 2.648505  | -0.945474 |
| 6 | -4.006098 | 1.272955  | -1.351173 |
| 6 | 3.758314  | -1.631628 | 1.163431  |
| 7 | 2.833518  | -2.525503 | 0.537574  |
| 7 | -3.093662 | -0.722702 | -2.656957 |

|   |           |           |           |
|---|-----------|-----------|-----------|
| 6 | -3.426499 | -1.641328 | -1.634986 |
| 6 | 3.805596  | 1.263664  | 1.747166  |
| 7 | 3.282434  | 0.312214  | 2.695323  |

CBN clusters from pentagonal pyramid isomer VIII

8b

| Atomic<br>Number | Coordinates (Angstroms) |           |           |
|------------------|-------------------------|-----------|-----------|
|                  | X                       | Y         | Z         |
| 5                | -0.348176               | 1.254085  | 0.914765  |
| 5                | 1.188187                | 1.015724  | 0.308574  |
| 5                | 0.348176                | -1.254085 | -0.914765 |
| 5                | -1.188187               | -1.015724 | -0.308574 |
| 5                | 1.446402                | -0.634086 | 0.196812  |
| 5                | -1.446402               | 0.634086  | -0.196812 |
| 5                | 0.069516                | -1.414030 | 0.729828  |
| 5                | 1.036324                | 0.246313  | -1.173630 |
| 5                | -1.036324               | -0.246313 | 1.173630  |
| 5                | -0.069516               | 1.414030  | -0.729828 |
| 5                | 1.132590                | 1.293131  | 3.847592  |
| 5                | -1.132590               | -1.293131 | -3.847592 |
| 6                | -0.538509               | 0.010179  | -1.367110 |
| 6                | 0.538509                | -0.010179 | 1.367110  |
| 6                | 2.450201                | 0.735875  | 3.272021  |
| 6                | -2.450201               | -0.735875 | -3.272021 |
| 5                | -0.024981               | -2.677257 | 1.673968  |
| 5                | 2.744873                | -1.435463 | 0.605554  |
| 5                | 2.520714                | 1.794198  | 0.657423  |
| 5                | -1.955901               | -0.212329 | 2.450712  |
| 5                | -0.363477               | 2.522527  | 1.853986  |
| 5                | -2.744873               | 1.435463  | -0.605554 |
| 5                | -2.520714               | -1.794198 | -0.657423 |
| 5                | 0.363477                | -2.522527 | -1.853986 |
| 5                | 1.955901                | 0.212329  | -2.450712 |
| 5                | 0.024981                | 2.677257  | -1.673968 |
| 5                | -1.120198               | 0.032527  | -2.719115 |
| 5                | 1.120198                | -0.032527 | 2.719115  |
| 7                | 0.275400                | 0.021833  | 4.061756  |
| 7                | -0.275400               | -0.021833 | -4.061756 |
| 6                | 3.234097                | -1.657792 | 2.198642  |
| 6                | -3.234097               | 1.657792  | -2.198642 |
| 6                | 3.189550                | 1.505563  | 2.209735  |
| 6                | -3.189550               | -1.505563 | -2.209735 |
| 6                | 0.456828                | 2.599473  | 3.313385  |
| 6                | -0.456828               | -2.599473 | -3.313385 |
| 6                | -1.217137               | 0.046021  | 3.927067  |
| 6                | 1.217137                | -0.046021 | -3.927067 |

|   |           |           |           |
|---|-----------|-----------|-----------|
| 6 | 0.390155  | -2.486236 | 3.303511  |
| 6 | -0.390155 | 2.486236  | -3.303511 |
| 5 | 2.509281  | -0.829719 | 3.344577  |
| 6 | 1.080522  | -1.246301 | 3.772815  |
| 6 | -1.080522 | 1.246301  | -3.772815 |
| 5 | -2.509281 | 0.829719  | -3.344577 |
| 7 | -1.022762 | 2.646671  | 3.198918  |
| 5 | 1.283304  | 3.298303  | 2.185580  |
| 6 | 0.313419  | 3.904794  | 0.914671  |
| 5 | -1.136791 | 3.641313  | 0.555557  |
| 7 | 1.022762  | -2.646671 | -3.198918 |
| 5 | 1.136791  | -3.641313 | -0.555557 |
| 5 | -1.283304 | -3.298303 | -2.185580 |
| 6 | -0.313419 | -3.904794 | -0.914671 |
| 7 | 2.687585  | 2.803162  | 1.797610  |
| 5 | 3.925696  | 0.638974  | 1.099208  |
| 6 | 3.788395  | 1.274743  | -0.474975 |
| 5 | 2.846746  | 2.356770  | -1.032001 |
| 7 | -2.687585 | -2.803162 | -1.797610 |
| 5 | -2.846746 | -2.356770 | 1.032001  |
| 5 | -3.925696 | -0.638974 | -1.099208 |
| 6 | -3.788395 | -1.274743 | 0.474975  |
| 7 | 4.011351  | -0.886162 | 1.198729  |
| 5 | 2.439877  | -2.897490 | 1.686931  |
| 5 | 2.980874  | -2.176632 | -1.108297 |
| 6 | 2.520476  | -3.129456 | -0.022312 |
| 7 | -4.011351 | 0.886162  | -1.198729 |
| 5 | -2.980874 | 2.176632  | 1.108297  |
| 5 | -2.439877 | 2.897490  | -1.686931 |
| 6 | -2.520476 | 3.129456  | 0.022312  |
| 7 | 1.142717  | -3.343483 | 2.378964  |
| 5 | -1.156584 | -2.435586 | 3.125956  |
| 5 | -1.012270 | -3.656590 | 0.476230  |
| 6 | -1.736698 | -3.203202 | 1.745860  |
| 7 | -1.142717 | 3.343483  | -2.378964 |
| 5 | 1.012270  | 3.656590  | -0.476230 |
| 5 | 1.156584  | 2.435586  | -3.125956 |
| 6 | 1.736698  | 3.203202  | -1.745860 |
| 7 | -1.894660 | -1.188215 | 3.610861  |
| 5 | -1.844920 | 1.389442  | 3.390837  |
| 5 | -3.535961 | -0.116795 | 1.494609  |
| 6 | -3.126232 | 1.131838  | 2.274780  |
| 7 | 1.894660  | 1.188215  | -3.610861 |
| 5 | 3.535961  | 0.116795  | -1.494609 |
| 5 | 1.844920  | -1.389442 | -3.390837 |
| 6 | 3.126232  | -1.131838 | -2.274780 |

8c

| Atomic<br>Number | Coordinates (Angstroms) |   |   |
|------------------|-------------------------|---|---|
|                  | X                       | Y | Z |

---

|   |           |           |           |
|---|-----------|-----------|-----------|
| 5 | -0.420357 | 1.201055  | 0.987475  |
| 5 | 1.134395  | 1.139201  | 0.274639  |
| 5 | 0.420357  | -1.201055 | -0.987475 |
| 5 | -1.134395 | -1.139201 | -0.274639 |
| 5 | 1.613619  | -0.516764 | 0.191525  |
| 5 | -1.613619 | 0.516764  | -0.191525 |
| 5 | 0.211777  | -1.474735 | 0.664459  |
| 5 | 1.019369  | 0.396722  | -1.265572 |
| 5 | -1.019369 | -0.396722 | 1.265572  |
| 5 | -0.211777 | 1.474735  | -0.664459 |
| 5 | 2.560045  | -2.266309 | -2.424858 |
| 5 | -2.896959 | 1.577761  | -2.019239 |
| 5 | 0.434245  | 4.004184  | 0.624736  |
| 5 | -2.193052 | 3.104459  | 0.161497  |
| 5 | 0.275300  | -2.682164 | 3.304735  |
| 5 | 2.896959  | -1.577761 | 2.019239  |
| 5 | 0.595519  | 3.525208  | 3.090567  |
| 5 | 2.193052  | -3.104459 | -0.161497 |
| 5 | -2.560045 | 2.266309  | 2.424858  |
| 5 | -0.275300 | 2.682164  | -3.304735 |
| 5 | -1.258939 | 0.187730  | 3.576243  |
| 5 | -3.092416 | -1.644401 | -2.308119 |
| 5 | -1.929433 | -3.217341 | 1.531872  |
| 5 | -0.434245 | -4.004184 | -0.624736 |
| 5 | -4.042068 | -1.320299 | 0.316689  |
| 5 | 4.042068  | 1.320299  | -0.316689 |
| 5 | -0.595519 | -3.525208 | -3.090567 |
| 5 | 3.092416  | 1.644401  | 2.308119  |
| 5 | 1.258939  | -0.187730 | -3.576243 |
| 5 | 0.976498  | -1.279570 | 3.972453  |
| 5 | 0.939172  | 1.293508  | 4.038516  |
| 5 | -0.976498 | 1.279570  | -3.972453 |
| 5 | 1.929433  | 3.217341  | -1.531872 |
| 5 | -0.939172 | -1.293508 | -4.038516 |
| 6 | -0.588800 | 0.020603  | -1.375441 |
| 6 | 0.588800  | -0.020603 | 1.375441  |
| 6 | 2.312152  | 0.870199  | 3.410974  |
| 6 | -2.312152 | -0.870199 | -3.410974 |
| 5 | -3.639069 | 1.007260  | 0.608231  |
| 5 | -0.003618 | 2.933243  | -1.400821 |
| 5 | 3.086165  | 1.113018  | -1.936644 |
| 5 | 0.695758  | -2.445617 | -1.971739 |
| 5 | -2.496008 | -2.052913 | -0.448526 |
| 5 | 0.003618  | -2.933243 | 1.400821  |
| 5 | 3.639069  | -1.007260 | -0.608231 |
| 5 | 2.496008  | 2.052913  | 0.448526  |
| 5 | -0.695758 | 2.445617  | 1.971739  |
| 5 | -3.086165 | -1.113018 | 1.936644  |
| 5 | 1.086587  | 0.038469  | 2.797581  |
| 5 | -1.086587 | -0.038469 | -2.797581 |
| 7 | -2.288156 | 0.778097  | -3.328266 |

|   |           |           |           |
|---|-----------|-----------|-----------|
| 6 | -0.145625 | 0.003529  | -4.210174 |
| 6 | 0.145625  | -0.003529 | 4.210174  |
| 7 | 2.288156  | -0.778097 | 3.328266  |
| 6 | -2.406404 | 2.977353  | -1.518173 |
| 6 | 2.406404  | -2.977353 | 1.518173  |
| 6 | -3.651475 | -0.889022 | -1.085700 |
| 6 | 3.651475  | 0.889022  | 1.085700  |
| 6 | 1.171919  | 2.483983  | -2.737071 |
| 6 | -1.171919 | -2.483983 | 2.737071  |
| 6 | 1.551505  | -1.851878 | -3.411740 |
| 6 | -1.551505 | 1.851878  | 3.411740  |
| 6 | -1.427937 | -3.866636 | -1.901778 |
| 6 | 1.427937  | 3.866636  | 1.901778  |
| 7 | -3.152418 | 2.314038  | 1.155712  |
| 6 | -3.238664 | 0.602896  | -0.835495 |
| 6 | 3.238664  | -0.602896 | 0.835495  |
| 7 | 3.152418  | -2.314038 | -1.155712 |
| 7 | 0.951882  | 3.910882  | -0.710057 |
| 6 | -1.245018 | 3.315318  | -2.215972 |
| 6 | 1.245018  | -3.315318 | 2.215972  |
| 7 | -0.951882 | -3.910882 | 0.710057  |
| 7 | 4.055827  | 0.231056  | -1.333835 |
| 6 | 1.754188  | 0.987413  | -2.672482 |
| 6 | -1.754188 | -0.987413 | 2.672482  |
| 7 | -4.055827 | -0.231056 | 1.333835  |
| 7 | 1.028220  | -3.631654 | -0.977411 |
| 6 | 0.206283  | -2.487220 | -3.658435 |
| 6 | -0.206283 | 2.487220  | 3.658435  |
| 7 | -1.028220 | 3.631654  | 0.977411  |
| 7 | -3.178940 | -2.385864 | 1.074664  |
| 6 | -2.478982 | -2.990852 | -1.694385 |
| 6 | 2.478982  | 2.990852  | 1.694385  |
| 7 | 3.178940  | 2.385864  | -1.074664 |
